# Supplementary material
Source: publisher figshare collection journal article supplement (https://gsajournals.figshare.com/articles/dataset/_/7210190)
Supplement: Supplementary file 1 [file 1]

## Sheet: dim1_sig_UPregulated_genes
id	baseMean	baseMeanA	baseMeanB	foldChange	log2FoldChange	pval	padj
NCU02663	272.285	6.53905	538.031	82.2797	6.36246	4.4676e-12	1.73168e-10
NCU17250	18.5585	1.51919	35.5978	23.4321	4.55042	2.32408e-05	0.000291379
NCU07029	136.69	11.6259	261.755	22.5149	4.49281	1.70749e-19	1.24904e-17
NCU09691	47.4839	4.55757	90.4103	19.8374	4.31015	0.0309711	0.116631
NCU09458	802.753	77.8102	1527.7	19.6336	4.29525	2.8298e-11	9.55941e-10
NCU17249	25.1666	2.57608	47.757	18.5386	4.21246	2.76261e-06	4.23934e-05
NCU04282	52.7277	5.74677	99.7086	17.3504	4.11689	0.00383745	0.022794
NCU09933	1060.84	123.126	1998.56	16.2318	4.02075	0.000734007	0.00579169
NCU08986	1397.9	172.665	2623.14	15.1921	3.92525	0.00432898	0.0250844
NCU00757	100.301	13.0781	187.523	14.3387	3.84185	0.00716093	0.0369791
NCU08176	81.085	10.9643	151.206	13.7907	3.78563	0.000720279	0.00570187
NCU00848	435.311	64.9282	805.694	12.409	3.63332	6.47286e-31	9.88162e-29
NCU16940	20.7776	3.17069	38.3846	12.1061	3.59766	9.50433e-05	0.00100678
NCU06434	9.58934	1.51919	17.6595	11.6243	3.53907	0.012968	0.0597094
NCU07768	91.9447	14.8619	169.028	11.3732	3.50757	3.76319e-06	5.63263e-05
NCU07897	99.8625	17.0426	182.682	10.7191	3.42212	9.5664e-14	4.47459e-12
NCU16729	231.394	40.0281	422.759	10.5615	3.40075	7.69573e-10	2.12132e-08
NCU05755	202.196	35.4052	368.988	10.4218	3.38154	2.51507e-20	1.91165e-18
NCU04542	335.791	61.2984	610.283	9.95594	3.31556	1.89531e-05	0.000242944
NCU03355	1168.45	223.128	2113.78	9.4734	3.24388	1.54042e-34	2.88207e-32
NCU00806	7.65328	1.51919	13.7874	9.07548	3.18197	0.0376541	0.134584
NCU01829	17.6058	3.50067	31.7109	9.05852	3.17927	0.00143875	0.0101949
NCU09798	2712.13	544.013	4880.24	8.97082	3.16524	0.00129858	0.00938622
NCU09796	53.9366	10.8336	97.0396	8.95729	3.16306	2.25656e-08	5.03534e-07
NCU05788	6462.76	1303.95	11621.6	8.91262	3.15585	4.58945e-05	0.000533461
NCU05230	170.06	34.6114	305.509	8.82683	3.1419	0.0188044	0.0791638
NCU00932	41.1708	8.52053	73.8211	8.66391	3.11502	1.73826e-06	2.7815e-05
NCU02876	54.5192	11.5589	97.4795	8.43328	3.07609	1.07064e-07	2.13011e-06
NCU08852	341.723	72.5911	610.855	8.41501	3.07297	0.000268128	0.00246329
NCU04499	610.114	130.057	1090.17	8.38225	3.06734	9.03157e-06	0.000126429
NCU07051	16.3371	3.50067	29.1735	8.3337	3.05896	0.00211828	0.01401
NCU07463	139.048	30.4507	247.645	8.13265	3.02373	3.63298e-05	0.000433152
NCU12151	1867.95	428.153	3307.76	7.72564	2.94965	1.16072e-05	0.000157279
NCU05831	303.532	70.9428	536.122	7.55711	2.91783	1.03267e-09	2.76772e-08
NCU07953	7127.98	1714.95	12541	7.31275	2.87041	0.0183583	0.0777753
NCU09185	1634.65	396.06	2873.25	7.25457	2.85889	3.63075e-10	1.04818e-08
NCU09402	89.5415	21.7309	157.352	7.24093	2.85617	5.52536e-10	1.5444e-08
NCU07406	11.1007	2.7084	19.4929	7.19722	2.84744	0.0187418	0.0789686
NCU00762	77.8028	19.0225	136.583	7.18007	2.844	2.82519e-06	4.32174e-05
NCU00984	1443.86	353.258	2534.46	7.17452	2.84288	0.000563627	0.00466683
NCU03198	11.6395	2.90607	20.373	7.01051	2.80952	0.0204083	0.0841698
NCU08056	374.079	94.7237	653.435	6.89832	2.78625	0.00148719	0.0104771
NCU02096	1780.63	451.677	3109.58	6.88452	2.78336	3.98262e-14	1.96685e-12
NCU07241	400.708	102.849	698.567	6.79217	2.76387	0.0394288	0.139239
NCU05922	748.871	194.598	1303.14	6.69659	2.74343	0.000509498	0.00427689
NCU07037	193.226	50.5971	335.855	6.63784	2.73071	0.00583956	0.031828
NCU06134	30.6284	8.05823	53.1986	6.60177	2.72285	0.00021149	0.00200154
NCU10799	19.5243	5.15217	33.8964	6.57905	2.71788	0.00225999	0.0147666
NCU17064	279.581	73.9811	485.182	6.55818	2.7133	0.00125009	0.00911017
NCU06747	504.368	133.894	874.841	6.53382	2.70793	0.0329094	0.122111
NCU07279	585.843	155.687	1016	6.52589	2.70617	6.83913e-08	1.41872e-06
NCU08310	14.1153	3.76529	24.4652	6.49757	2.6999	0.00899798	0.044505
NCU17043	18.0499	4.88755	31.2122	6.38608	2.67493	0.00474876	0.0270972
NCU01340	307.274	83.2939	531.254	6.37807	2.67312	1.62671e-08	3.71508e-07
NCU00992	311.645	85.54	537.749	6.28652	2.65226	0.004136	0.0241447
NCU09372	35.011	9.70973	60.3122	6.21152	2.63495	0.000140832	0.00140818
NCU04039	779.481	218.441	1340.52	6.13676	2.61748	0.0412335	0.143734
NCU08186	43.4903	12.3528	74.6279	6.04139	2.59488	1.06772e-05	0.000146721
NCU11054	52.0826	14.7965	89.3686	6.03983	2.59451	2.50243e-06	3.88296e-05
NCU10040	25884.2	7431.7	44336.6	5.96588	2.57673	0.0263982	0.1027
NCU09273	88.5457	25.4309	151.661	5.96364	2.57619	0.00341669	0.0206338
NCU03297	5047.24	1461.3	8633.19	5.90789	2.56264	7.40408e-06	0.000105006
NCU01496	79.7812	23.1848	136.378	5.88221	2.55636	5.95349e-08	1.251e-06
NCU16667	426.057	123.848	728.265	5.88031	2.55589	2.00901e-10	6.01403e-09
NCU04058	1874	545.21	3202.79	5.87441	2.55445	4.0638e-25	4.88108e-23
NCU03016	30.1446	8.85051	51.4387	5.81195	2.53902	0.00407689	0.0238976
NCU00118	243.257	71.4704	415.044	5.80722	2.53785	5.54008e-10	1.5444e-08
NCU08187	32.2983	9.57902	55.0175	5.74354	2.52194	0.000132407	0.00133907
NCU07668	363.691	108.857	618.525	5.68199	2.5064	9.35429e-15	4.91935e-13
NCU02019	45.2061	13.5404	76.8718	5.67723	2.50519	3.33609e-05	0.00040269
NCU00017	367.825	110.906	624.744	5.63312	2.49393	1.00774e-07	2.01734e-06
NCU09116	832.964	257.215	1408.71	5.4768	2.45333	0.000622223	0.00504888
NCU09484	49.8645	15.5235	84.2056	5.42441	2.43947	1.19037e-05	0.000161073
NCU04554	2997.18	935.598	5058.76	5.40698	2.43482	1.28601e-08	3.00039e-07
NCU08183	1118.24	349.689	1886.79	5.39561	2.43179	1.25069e-21	1.15885e-19
NCU03761	427.284	136.072	718.496	5.28027	2.40061	6.11167e-05	0.000685818
NCU08899	615.842	198.427	1033.26	5.20724	2.38052	0.000536392	0.00448715
NCU08100	70.533	22.7878	118.278	5.19041	2.37585	2.43459e-05	0.000303113
NCU09486	557.559	182.637	932.481	5.10564	2.35209	1.54948e-17	1.00499e-15
NCU08188	38.6058	12.7481	64.4635	5.05671	2.3382	0.0316306	0.118587
NCU09395	188.638	62.3521	314.925	5.05075	2.3365	0.0234106	0.0939226
NCU03318	1361.56	450.424	2272.71	5.0457	2.33505	0.00154028	0.0107964
NCU00265	1530.5	512.905	2548.1	4.96797	2.31266	0.026134	0.10203
NCU00288	55.4647	18.6272	92.3022	4.95524	2.30895	0.00283947	0.0177769
NCU16380	120.538	40.822	200.254	4.90555	2.29441	5.55772e-09	1.35857e-07
NCU02773	1496.89	513.108	2480.68	4.83462	2.2734	6.78703e-15	3.68889e-13
NCU10521	409.826	140.76	678.893	4.82305	2.26995	0.0479774	0.160291
NCU07464	61.3363	21.2033	101.469	4.78555	2.25868	0.0041038	0.0240078
NCU02702	1157.66	400.603	1914.71	4.77957	2.25688	1.24481e-18	8.65056e-17
NCU06166	326.482	114.009	538.955	4.72729	2.24101	8.1766e-05	0.000877069
NCU17284	197.039	69.092	324.986	4.70367	2.23379	4.01245e-08	8.65568e-07
NCU02895	192.672	68.3651	316.978	4.63655	2.21305	0.00574994	0.0315339
NCU05616	76.629	27.28	125.978	4.61795	2.20725	0.0168048	0.0728433
NCU11356	835.918	300.157	1371.68	4.56988	2.19216	3.03001e-17	1.93941e-15
NCU06625	42.8019	15.3911	70.2126	4.56188	2.18963	0.0133445	0.0608095
NCU08425	198.429	71.4034	325.455	4.55797	2.18839	1.6594e-10	4.98281e-09
NCU07452	186.404	67.2428	305.565	4.5442	2.18403	0.024955	0.0987533
NCU01945	1320.78	477.108	2164.45	4.5366	2.18161	0.0137636	0.0623978
NCU08473	277.055	100.402	453.708	4.51892	2.17598	0.0264352	0.102714
NCU01516	715.72	265.472	1165.97	4.39205	2.13489	0.0147336	0.065905
NCU03274	1259.16	467.601	2050.73	4.38564	2.13279	0.000965812	0.00736532
NCU10404	33.3731	12.4181	54.3281	4.3749	2.12925	0.00118572	0.00875917
NCU03978	64.44	23.9786	104.901	4.37478	2.12921	1.39197e-05	0.000185006
NCU07846	1233.23	459.801	2006.66	4.36418	2.12571	0.0281517	0.107957
NCU05872	154.997	57.8615	252.133	4.35753	2.12351	6.9261e-09	1.66792e-07
NCU09693	15374.5	5770.96	24978	4.32822	2.11377	3.55576e-13	1.56534e-11
NCU08644	16.6606	6.27442	27.0468	4.31063	2.1079	0.0264443	0.102714
NCU08005	301.503	114.406	488.599	4.27074	2.09449	0.0112069	0.0530951
NCU06757	494.369	187.723	801.015	4.26701	2.09323	0.000219817	0.00206628
NCU16449	74.4041	28.4039	120.404	4.23901	2.08373	0.0102581	0.0494667
NCU11241	315.523	120.679	510.367	4.22913	2.08036	1.00586e-11	3.66516e-10
NCU06155	52.9315	20.2787	85.5843	4.2204	2.07738	0.000122549	0.00126167
NCU03408	486.445	187.394	785.496	4.19168	2.06753	0.00317679	0.019512
NCU06919	39.2081	15.1265	63.2897	4.18402	2.06489	0.000937786	0.00718969
NCU01061	410.491	158.394	662.587	4.18316	2.06459	0.0154903	0.0684366
NCU09506	125.463	48.6172	202.308	4.16124	2.05701	0.0151297	0.0672333
NCU04421	1050.81	408.217	1693.4	4.14828	2.05251	2.31184e-07	4.39295e-06
NCU04850	27.4985	10.7013	44.2957	4.1393	2.04939	0.04819	0.160837
NCU02212	24.3738	9.64438	39.1033	4.05452	2.01953	0.00675776	0.0354619
NCU04292	480.042	190.632	769.452	4.03632	2.01304	5.40488e-13	2.33707e-11
NCU03684	8158.21	3251.65	13064.8	4.01789	2.00644	1.28877e-15	7.37555e-14
NCU01395	1197.52	480.279	1914.75	3.98675	1.99521	0.000245972	0.0022791
NCU05694	101.599	40.8874	162.31	3.96968	1.98902	0.00318596	0.0195313
NCU02909	188.533	75.9594	301.107	3.96405	1.98698	9.40508e-09	2.22092e-07
NCU05319	70.5054	28.4676	112.543	3.95337	1.98308	0.00225752	0.0147604
NCU09354	856.673	347.253	1366.09	3.934	1.976	8.20063e-15	4.38373e-13
NCU05858	16.0448	6.53905	25.5506	3.90739	1.9662	0.0437923	0.150125
NCU00748	1706.45	696.659	2716.25	3.89897	1.96309	0.00507543	0.0286088
NCU07479	49.8335	20.3456	79.3214	3.89869	1.96299	0.000256277	0.0023611
NCU06913	15.3561	6.40833	24.3039	3.79254	1.92317	0.0324504	0.121008
NCU04487	1428.52	596.745	2260.31	3.78773	1.92133	3.11001e-15	1.73892e-13
NCU06080	46.4109	19.4848	73.337	3.7638	1.91219	0.00108102	0.00808842
NCU04097	803.094	337.799	1268.39	3.75487	1.90876	0.00793422	0.0402461
NCU06754	3605.68	1517.91	5693.45	3.75085	1.90722	8.22625e-08	1.66736e-06
NCU04497	476.884	202.387	751.38	3.7126	1.89243	1.11756e-05	0.000152492
NCU06748	817.73	349.353	1286.11	3.6814	1.88025	0.0262696	0.102325
NCU04904	1614.31	690.803	2537.81	3.67371	1.87724	8.17356e-10	2.24634e-08
NCU01339	252.552	108.262	396.841	3.66554	1.87403	4.50645e-09	1.11845e-07
NCU06967	362.882	155.82	569.945	3.65772	1.87095	0.000121543	0.00125264
NCU04493	8924.49	3832.55	14016.4	3.65721	1.87074	1.96641e-08	4.41828e-07
NCU08421	253.815	109.19	398.44	3.64904	1.86752	2.17378e-09	5.59489e-08
NCU03462	481.789	208.604	754.975	3.61918	1.85566	1.77838e-11	6.2688e-10
NCU00180	118.481	51.5217	185.441	3.59927	1.84771	0.0395782	0.139614
NCU17100	3163.1	1378.41	4947.8	3.58951	1.84379	0.0388308	0.137481
NCU10342	15.5685	6.80367	24.3332	3.57649	1.83854	0.0499331	0.165125
NCU00955	2296.68	1004.88	3588.47	3.57105	1.83635	2.71232e-09	6.8719e-08
NCU06117	942.865	412.77	1472.96	3.56848	1.83531	4.0249e-13	1.76388e-11
NCU17278	70.6461	30.9784	110.314	3.56099	1.83228	0.00569845	0.0313398
NCU08803	36.0955	15.8534	56.3375	3.55364	1.8293	0.00351679	0.0211595
NCU08120	685.571	301.144	1070	3.55312	1.82909	0.0060853	0.0328546
NCU03273	851.007	376.711	1325.3	3.51809	1.81479	8.34684e-13	3.53071e-11
NCU06450	600.966	266.798	935.133	3.50502	1.80942	0.00315909	0.0194278
NCU09396	28.2177	12.5504	43.8849	3.49668	1.80599	0.00959529	0.0468402
NCU06795	66.0957	29.4608	102.731	3.48703	1.802	0.000149537	0.00148605
NCU00959	1839.79	820.249	2859.33	3.48593	1.80154	0.0200709	0.0831509
NCU09430	85.4186	38.112	132.725	3.4825	1.80012	6.71607e-05	0.000739985
NCU06920	17.1275	7.66289	26.592	3.47023	1.79503	0.0369271	0.13257
NCU01748	6092.19	2727.29	9457.09	3.46758	1.79393	0.00701514	0.036439
NCU04494	336.182	150.602	521.762	3.46451	1.79265	0.000420289	0.00364438
NCU11405	92.0514	41.2859	142.817	3.45922	1.79045	0.0275249	0.106024
NCU05899	3550.37	1595.95	5504.79	3.44922	1.78627	0.00937085	0.0460449
NCU09355	1849.71	832.313	2867.11	3.44475	1.7844	1.55254e-10	4.72022e-09
NCU02196	40.214	18.1649	62.2631	3.42766	1.77722	0.00307557	0.0189621
NCU05525	3028.29	1368.11	4688.46	3.42696	1.77693	6.41368e-14	3.05876e-12
NCU09473	464.904	210.781	719.026	3.41124	1.7703	1.22528e-10	3.78437e-09
NCU06206	2885.97	1316.31	4455.63	3.38495	1.75914	1.68489e-13	7.52309e-12
NCU05502	504.816	230.397	779.235	3.38214	1.75794	1.50504e-10	4.60457e-09
NCU05404	39810.8	18171.1	61450.6	3.38178	1.75778	9.35274e-15	4.91935e-13
NCU07432	1446.47	660.271	2232.67	3.38144	1.75764	1.16275e-12	4.83437e-11
NCU01968	951.952	435.157	1468.75	3.37521	1.75498	0.0047897	0.0272668
NCU09794	614.783	281.321	948.245	3.37069	1.75304	0.0158413	0.0697062
NCU02190	5854.33	2680	9028.65	3.36889	1.75227	1.11587e-13	5.19441e-12
NCU08707	1308.53	601.022	2016.05	3.35437	1.74604	2.43857e-12	9.80366e-11
NCU01589	1879.19	863.149	2895.22	3.35425	1.74599	0.0053144	0.0297319
NCU10048	44.7908	20.674	68.9075	3.33305	1.73684	0.00275647	0.0173241
NCU17114	978.866	452.009	1505.72	3.33118	1.73603	6.17129e-05	0.00069171
NCU04569	3189.95	1475.46	4904.45	3.32401	1.73293	2.54013e-06	3.93517e-05
NCU05780	1517.29	703.679	2330.89	3.31244	1.72789	0.00483896	0.0274989
NCU09806	2082.05	966.443	3197.67	3.3087	1.72626	8.02459e-08	1.63671e-06
NCU00710	158.715	73.7165	243.713	3.30608	1.72512	0.0072961	0.0376372
NCU06371	494.707	230.464	758.95	3.29314	1.71946	4.18858e-10	1.19855e-08
NCU00862	550.659	256.947	844.371	3.28617	1.71641	0.000376051	0.00330796
NCU02726	767.574	358.546	1176.6	3.28159	1.7144	5.21917e-06	7.57871e-05
NCU10038	323.275	151.334	495.216	3.27234	1.71032	0.000289764	0.00263223
NCU12112	98.527	46.3026	150.751	3.25579	1.70301	7.61432e-05	0.000824024
NCU03068	1184.78	557.23	1812.33	3.2524	1.7015	9.85414e-12	3.60417e-10
NCU07402	818.144	385.494	1250.79	3.24465	1.69806	1.83443e-11	6.44302e-10
NCU09838	95.6788	45.3142	146.043	3.2229	1.68836	4.81333e-05	0.000557486
NCU09791	36.5282	17.3057	55.7507	3.22153	1.68775	0.00850411	0.0425599
NCU09760	1669.29	791.47	2547.11	3.21821	1.68626	6.09084e-09	1.47775e-07
NCU03078	242.571	115.069	370.072	3.21608	1.6853	0.0446514	0.15184
NCU02943	1163.23	552.211	1774.24	3.21297	1.68391	0.00028194	0.00258043
NCU09734	43.9361	20.8717	67.0005	3.21011	1.68262	0.0483783	0.16141
NCU02704	36.6758	17.4396	55.9121	3.20605	1.6808	0.00537834	0.029972
NCU03500	1010.48	481.009	1539.95	3.20149	1.67874	1.58293e-11	5.62054e-10
NCU06721	35.2157	16.778	53.6533	3.19783	1.67709	0.00829157	0.0417108
NCU04924	1387.31	663.536	2111.07	3.18155	1.66973	0.00680876	0.035691
NCU05257	2442.01	1168.31	3715.71	3.18043	1.66922	3.5874e-07	6.61019e-06
NCU01343	484.269	232.045	736.493	3.17392	1.66627	0.000398767	0.00348885
NCU09245	153.803	73.7181	233.887	3.17272	1.66572	0.00792966	0.040244
NCU08138	85.9673	41.2189	130.716	3.17125	1.66505	0.00436751	0.0252625
NCU01983	503.764	242.683	764.845	3.15162	1.65609	0.00696695	0.0362468
NCU06060	47.506	22.9217	72.0903	3.14506	1.65309	0.00240272	0.0154808
NCU02549	5742.62	2772.07	8713.16	3.14319	1.65223	0.0170864	0.0737495
NCU04768	446.517	215.93	677.104	3.13575	1.64881	0.0208095	0.0853165
NCU01521	138.636	67.0451	210.228	3.13561	1.64875	1.03805e-05	0.000143252
NCU06726	227.197	111.103	343.29	3.08983	1.62753	0.00119237	0.00879495
NCU03229	822.389	402.862	1241.92	3.08273	1.62421	0.000861824	0.00667571
NCU06469	826.94	405.512	1248.37	3.0785	1.62223	0.00288087	0.0179552
NCU06342	1750.06	859.167	2640.95	3.07385	1.62005	2.15904e-11	7.4487e-10
NCU00290	23.1202	11.3612	34.8791	3.07001	1.61824	0.0353836	0.128931
NCU10772	52.7719	25.9585	79.5854	3.06587	1.6163	0.00254293	0.0162531
NCU07334	1815.62	895.081	2736.16	3.05688	1.61206	3.30086e-11	1.10738e-09
NCU02804	608.177	300.744	915.611	3.04449	1.6062	0.00199099	0.0133496
NCU10292	454.986	225.313	684.659	3.0387	1.60345	0.000152079	0.00150823
NCU09816	4125.11	2043.44	6206.77	3.03741	1.60284	0.0319006	0.119462
NCU05813	1719.41	853.425	2585.39	3.02943	1.59904	0.00319797	0.019568
NCU07951	3211.06	1595.98	4826.15	3.02394	1.59643	8.03076e-12	2.97077e-10
NCU04472	5894.76	2934.08	8855.44	3.01813	1.59366	3.35923e-12	1.32854e-10
NCU04765	228.508	113.813	343.202	3.01549	1.59239	6.20436e-07	1.09352e-05
NCU08117	226.202	112.823	339.58	3.00984	1.58969	3.9342e-07	7.19471e-06
NCU05552	689.201	343.81	1034.59	3.0092	1.58938	0.000282967	0.00258739
NCU04045	374.205	186.868	561.542	3.00501	1.58737	2.83769e-08	6.24613e-07
NCU00264	194.515	97.1643	291.866	3.00384	1.58681	0.00646059	0.0344223
NCU04537	33.03	16.5134	49.5466	3.00038	1.58515	0.0134662	0.061221
NCU08371	157.976	79.001	236.952	2.99935	1.58465	9.3227e-06	0.000129926
NCU06596	893.968	449.3	1338.63	2.97938	1.57501	5.23778e-10	1.47279e-08
NCU08125	60.8265	30.583	91.07	2.9778	1.57424	0.00130042	0.00939256
NCU05601	414.166	208.534	619.799	2.97218	1.57152	0.00489866	0.0277572
NCU01944	462.564	233.368	691.759	2.96424	1.56766	1.15716e-08	2.71278e-07
NCU10809	446.635	225.975	667.295	2.95296	1.56216	0.000677738	0.00542246
NCU09129	852.741	431.459	1274.02	2.95282	1.5621	0.001596	0.0111397
NCU00831	2335.04	1181.9	3488.17	2.95132	1.56136	4.63064e-11	1.5118e-09
NCU09147	30.6575	15.5235	45.7916	2.94983	1.56063	0.0183724	0.0777753
NCU04046	5477.41	2776.05	8178.78	2.9462	1.55885	9.274e-05	0.000984345
NCU08947	3619.15	1834.7	5403.6	2.94522	1.55838	0.0246718	0.0979722
NCU10028	5565.85	2832.46	8299.24	2.93004	1.55092	1.99838e-11	6.95911e-10
NCU08693	6948.79	3539.53	10358.1	2.9264	1.54913	0.000781276	0.00612493
NCU05123	1186.08	604.599	1767.55	2.92352	1.5477	2.17318e-10	6.46571e-09
NCU05170	96.0801	49.0795	143.081	2.91528	1.54364	0.000145197	0.00144588
NCU06461	332.19	169.693	494.687	2.91518	1.54359	0.000131369	0.00133274
NCU04909	973.538	497.395	1449.68	2.91455	1.54327	6.06723e-10	1.68652e-08
NCU02017	897.276	459.142	1335.41	2.90849	1.54027	1.07944e-05	0.000147914
NCU07478	283.505	145.587	421.424	2.89465	1.53339	3.62482e-07	6.66651e-06
NCU03254	256.406	131.71	381.102	2.89349	1.53281	0.00529371	0.0296502
NCU01753	654.057	336.283	971.831	2.88992	1.53103	0.000500776	0.00422188
NCU02955	1063.59	549.242	1577.93	2.87293	1.52252	5.76607e-05	0.000651546
NCU05881	6298.63	3256.71	9340.55	2.86809	1.52009	2.72975e-11	9.25358e-10
NCU05477	90.6993	46.8988	134.5	2.86788	1.51998	0.000425659	0.00367526
NCU06940	42347.3	21918.2	62776.3	2.86411	1.51809	0.0333821	0.123614
NCU07756	1672.17	866.688	2477.66	2.85876	1.51539	0.014815	0.0662082
NCU01855	246.551	128.28	364.823	2.84396	1.5079	7.97613e-07	1.37102e-05
NCU07021	1093.41	569.581	1617.24	2.83935	1.50556	0.00815263	0.0412036
NCU07318	16533.1	8616.67	24449.4	2.83746	1.5046	0.0412147	0.143734
NCU07907	224.653	117.311	331.996	2.83006	1.50083	5.8158e-06	8.38056e-05
NCU08940	2996.05	1565.2	4426.89	2.82832	1.49994	0.00583701	0.031828
NCU02258	129.128	67.5074	190.749	2.8256	1.49856	0.0498626	0.165005
NCU03653	1234.26	646.076	1822.44	2.82078	1.49609	6.45167e-05	0.000714901
NCU08275	181.686	95.2514	268.12	2.81487	1.49307	1.3352e-05	0.000178191
NCU04334	767.855	402.861	1132.85	2.81201	1.4916	0.00455418	0.0261965
NCU01404	134.439	70.5458	198.332	2.8114	1.49129	0.00614179	0.0330678
NCU00114	820.635	430.801	1210.47	2.80981	1.49047	0.00209041	0.0138634
NCU08184	134.483	70.8088	198.157	2.79847	1.48464	7.91503e-05	0.000853407
NCU04996	1121.48	590.791	1652.17	2.79654	1.48364	0.0020208	0.0135361
NCU06758	391.479	206.355	576.604	2.79424	1.48245	0.00202775	0.0135494
NCU06965	106.533	56.3455	156.721	2.78144	1.47583	0.00125254	0.00912125
NCU04064	52.1757	27.6116	76.7398	2.77926	1.4747	0.00448327	0.0258552
NCU10003	204.224	108.264	300.184	2.7727	1.47129	0.000697983	0.00554794
NCU01652	4038.75	2141.23	5936.27	2.77237	1.47112	0.00824999	0.0416092
NCU02009	7095.99	3768.77	10423.2	2.76568	1.46764	1.02735e-10	3.20356e-09
NCU03730	317.153	168.573	465.734	2.76281	1.46614	5.29202e-07	9.49928e-06
NCU01474	1054.57	560.729	1548.41	2.76142	1.46541	0.00153179	0.0107446
NCU00149	37.1414	19.7494	54.5334	2.76126	1.46533	0.0198272	0.08232
NCU16450	3281.35	1747.88	4814.81	2.75465	1.46187	7.69684e-10	2.12132e-08
NCU05060	170.921	91.0891	250.754	2.75284	1.46092	2.93496e-05	0.000358271
NCU06244	388.358	207.606	569.109	2.7413	1.45486	5.14304e-07	9.26186e-06
NCU04412	673.417	359.998	986.835	2.74122	1.45482	0.0044031	0.0254381
NCU09199	550.089	294.072	806.105	2.74118	1.4548	6.66364e-08	1.38824e-06
NCU01894	474.101	253.453	694.75	2.74114	1.45478	0.000470299	0.00401012
NCU00096	64.568	34.546	94.5901	2.73809	1.45317	0.00288559	0.0179731
NCU08147	1424.74	762.459	2087.03	2.73724	1.45272	0.00462562	0.0264877
NCU16844	2287.66	1224.7	3350.61	2.73586	1.45199	0.03864	0.13708
NCU05083	75.3954	40.492	110.299	2.72396	1.44571	0.00171382	0.0118494
NCU06451	766.079	411.453	1120.7	2.72377	1.44561	0.00192418	0.0130365
NCU09308	221.937	119.622	324.252	2.71063	1.43863	0.00192972	0.0130467
NCU02184	684.206	369.169	999.244	2.70674	1.43655	0.0146279	0.0655924
NCU08969	28.8861	15.5888	42.1835	2.70601	1.43617	0.0359257	0.13003
NCU03752	527.549	284.957	770.141	2.70266	1.43438	1.36826e-07	2.68925e-06
NCU00304	1857.05	1006.8	2707.31	2.68903	1.42709	1.87801e-09	4.88533e-08
NCU00676	157.337	85.4093	229.266	2.68432	1.42455	0.0194031	0.0809144
NCU06619	9336.11	5090.96	13581.3	2.66772	1.41561	0.00391073	0.0231855
NCU08825	84.1893	46.0379	122.341	2.65739	1.41001	0.00181941	0.0124528
NCU00847	1203.1	659.085	1747.11	2.65081	1.40643	7.73139e-09	1.84359e-07
NCU00578	91.9583	50.3994	133.517	2.64918	1.40555	0.00105577	0.00794398
NCU01102	915.768	502.805	1328.73	2.64264	1.40198	0.00774992	0.0395795
NCU03501	330.684	181.786	479.581	2.63816	1.39953	0.0298395	0.113225
NCU08980	1221.12	671.775	1770.47	2.63552	1.39809	6.88298e-09	1.66165e-07
NCU05248	687.388	378.289	996.486	2.63419	1.39736	0.0280694	0.107769
NCU03385	211.442	116.585	306.299	2.62725	1.39355	0.00163382	0.0113539
NCU06063	279.225	154.039	404.41	2.62538	1.39252	0.00183395	0.0125362
NCU00466	526.458	290.769	762.146	2.62114	1.39019	0.0112877	0.0533616
NCU08283	6315.85	3490.4	9141.3	2.61898	1.38901	1.54905e-09	4.0842e-08
NCU05526	6413.64	3548.93	9278.36	2.61441	1.38649	1.07101e-09	2.8626e-08
NCU12100	190.459	105.42	275.497	2.61332	1.38589	0.038762	0.137333
NCU00699	238.281	132.039	344.523	2.60926	1.38364	1.20062e-05	0.000162234
NCU05517	1038.65	576.123	1501.18	2.60565	1.38165	0.000169971	0.00166363
NCU16329	1258.86	698.458	1819.25	2.60467	1.3811	0.000118188	0.00122195
NCU05873	1981.67	1101.18	2862.16	2.59918	1.37806	0.0181483	0.0771789
NCU09091	207.251	115.2	299.303	2.59811	1.37746	2.86478e-05	0.000351468
NCU08893	671.353	373.207	969.498	2.59775	1.37726	0.0150921	0.067128
NCU03270	645.202	359.271	931.132	2.59172	1.37391	0.000125365	0.0012892
NCU05246	1329.13	740.127	1918.14	2.59164	1.37387	3.59511e-08	7.82479e-07
NCU08314	1294.47	721.181	1867.76	2.58987	1.37288	1.39616e-08	3.2331e-07
NCU00891	1210.36	675.003	1745.72	2.58625	1.37086	0.0323152	0.12055
NCU16968	145.909	81.4448	210.374	2.58303	1.36906	0.000321139	0.00288758
NCU03921	382.972	213.818	552.125	2.58222	1.36861	9.7371e-07	1.64752e-05
NCU04543	573.334	320.232	826.437	2.58075	1.36779	0.0247348	0.0981023
NCU02705	202.196	113.083	291.309	2.57606	1.36517	5.25826e-05	0.000602563
NCU07386	783.089	438.006	1128.17	2.5757	1.36496	1.31994e-07	2.59953e-06
NCU08621	2379.84	1331.47	3428.2	2.57476	1.36444	0.00378626	0.02253
NCU08336	4082.53	2284.14	5880.91	2.57467	1.36439	0.00205652	0.0136916
NCU00051	560.139	313.425	806.852	2.57431	1.36419	0.00119555	0.00880506
NCU04764	187.812	105.157	270.466	2.57202	1.3629	0.00623716	0.0334603
NCU02127	303.365	169.891	436.839	2.57129	1.36249	5.35311e-06	7.75007e-05
NCU09064	152.051	85.2053	218.897	2.56905	1.36123	0.000183974	0.00177568
NCU05850	2180.04	1221.65	3138.42	2.56899	1.3612	0.00782968	0.0398197
NCU08847	17197.3	9647.96	24746.6	2.56496	1.35893	0.000534429	0.00447458
NCU07871	172.32	96.702	247.937	2.56393	1.35836	0.000116596	0.00120699
NCU05638	1199.38	673.102	1725.65	2.56373	1.35824	0.000430263	0.00370445
NCU16506	217.261	122.004	312.518	2.56155	1.35702	1.9677e-05	0.000250901
NCU09862	1152.99	647.651	1658.32	2.56052	1.35644	0.0386786	0.137137
NCU00952	416.446	234.097	598.796	2.5579	1.35496	0.000628472	0.00508685
NCU05835	410.368	230.727	590.01	2.55718	1.35455	0.000292198	0.00264693
NCU04809	343.432	193.144	493.719	2.55622	1.35401	3.23757e-06	4.90628e-05
NCU01347	467.261	262.963	671.56	2.55382	1.35266	0.0360864	0.13048
NCU08898	486.793	274.39	699.195	2.54818	1.34947	5.43594e-07	9.70389e-06
NCU06606	2530.19	1430.52	3629.86	2.53744	1.34338	0.0413182	0.143926
NCU03814	461.778	261.178	662.379	2.53612	1.34262	0.00775892	0.0396047
NCU07696	734.651	416.006	1053.3	2.53193	1.34023	2.08918e-07	4.0011e-06
NCU00317	298.773	169.229	428.317	2.53099	1.3397	8.51814e-06	0.000120106
NCU12023	1367.68	775.073	1960.28	2.52915	1.33866	0.00514827	0.0289858
NCU05512	975.418	553.329	1397.51	2.52563	1.33665	0.0265862	0.103092
NCU02724	1343.86	762.663	1925.05	2.52412	1.33578	3.77602e-08	8.16376e-07
NCU01650	479.758	272.54	686.976	2.52064	1.33379	0.00562757	0.0310645
NCU07242	126.96	72.132	181.788	2.52021	1.33355	0.000287797	0.00262416
NCU05752	1149.35	653.007	1645.7	2.52018	1.33353	9.53724e-08	1.9171e-06
NCU05268	33.1777	18.8918	47.4637	2.51239	1.32906	0.0399313	0.140554
NCU07549	685.761	390.51	981.012	2.51213	1.32891	0.0114179	0.0538721
NCU05807	1988.74	1132.75	2844.74	2.51136	1.32847	4.21077e-08	9.02349e-07
NCU07666	1151.87	656.124	1647.62	2.51114	1.32834	5.83995e-05	0.000659128
NCU01800	688.413	392.293	984.533	2.50969	1.32751	0.00597827	0.0324206
NCU04636	1383.1	789.418	1976.78	2.5041	1.32429	5.26894e-08	1.11438e-06
NCU08900	155.74	88.9753	222.504	2.50074	1.32235	0.00477646	0.0272074
NCU03394	873.481	500.162	1246.8	2.49279	1.31776	0.000138838	0.00139454
NCU05653	646.604	371.025	922.183	2.4855	1.31354	6.45627e-07	1.13381e-05
NCU00850	129.266	74.1772	184.355	2.48533	1.31344	0.00907892	0.0448369
NCU03559	4966.8	2852.6	7080.99	2.48229	1.31167	0.0235514	0.0944094
NCU00371	679.3	390.245	968.355	2.4814	1.31116	0.000142689	0.00142381
NCU03338	559.132	321.416	796.849	2.47918	1.30986	0.0223519	0.0905714
NCU07546	700.971	403.793	998.149	2.47193	1.30564	0.0441936	0.150916
NCU07465	8761.07	5048.97	12473.2	2.47044	1.30477	2.80394e-08	6.18584e-07
NCU04578	226.145	130.457	321.832	2.46695	1.30273	5.42992e-05	0.000619317
NCU06768	948.738	547.917	1349.56	2.46307	1.30046	0.00397922	0.0234487
NCU00291	403.308	233.105	573.51	2.4603	1.29884	3.79235e-06	5.65887e-05
NCU01319	1754.57	1014.53	2494.6	2.45887	1.298	4.61965e-08	9.87793e-07
NCU02722	198.563	114.999	282.128	2.4533	1.29472	8.99818e-05	0.000959904
NCU05287	307.005	177.817	436.193	2.45305	1.29458	1.93981e-05	0.000248321
NCU08510	38.184	22.1279	54.24	2.45121	1.29349	0.0345192	0.126397
NCU00870	721.738	418.446	1025.03	2.44961	1.29255	1.08424e-05	0.000148362
NCU11050	4353.45	2525.43	6181.46	2.44769	1.29142	1.63289e-08	3.72047e-07
NCU00262	69.7256	40.4904	98.9608	2.44405	1.28928	0.00782123	0.0397975
NCU02928	83.6822	48.6172	118.747	2.44249	1.28835	0.00321262	0.0196206
NCU00021	542.969	315.475	770.464	2.44224	1.2882	1.53445e-06	2.47984e-05
NCU04575	184.487	107.206	261.769	2.44175	1.28791	0.000140283	0.00140413
NCU01473	722.867	420.763	1024.97	2.43598	1.2845	0.00308326	0.0189975
NCU02973	122.53	71.3397	173.72	2.43512	1.28399	0.00171488	0.0118494
NCU01971	157.313	91.6821	222.944	2.43171	1.28197	0.000390659	0.00342407
NCU04923	3147.37	1835.55	4459.18	2.42934	1.28056	5.21333e-05	0.000598119
NCU02435	22775.6	13289.3	32261.8	2.42765	1.27956	0.0120694	0.056372
NCU05757	275.58	160.846	390.314	2.42663	1.27896	2.19824e-05	0.000277399
NCU07240	1789.37	1044.85	2533.9	2.42513	1.27806	7.65168e-08	1.56393e-06
NCU05196	1001.21	584.848	1417.57	2.42383	1.27729	0.00138084	0.00985635
NCU05832	3697.02	2159.98	5234.05	2.4232	1.27691	0.00314408	0.0193478
NCU03737	2662.29	1556.55	3768.02	2.42074	1.27545	0.00854341	0.042639
NCU09676	1248.51	730.345	1766.67	2.41895	1.27438	0.0045586	0.0261965
NCU01807	444.147	260.121	628.174	2.41493	1.27198	0.00914625	0.0451237
NCU04854	106.457	62.3537	150.561	2.41463	1.2718	0.00166875	0.0115636
NCU05714	1856.01	1087.38	2624.64	2.41372	1.27126	0.00319207	0.0195565
NCU04171	738.468	432.852	1044.08	2.4121	1.27029	1.10838e-06	1.85283e-05
NCU02271	676.202	396.851	955.553	2.40784	1.26774	3.0059e-05	0.000365555
NCU09144	590.563	346.652	834.473	2.40723	1.26738	1.32101e-06	2.17464e-05
NCU04049	780.696	459.941	1101.45	2.39477	1.25988	0.00671103	0.0352928
NCU00312	60.0833	35.4036	84.7629	2.39419	1.25954	0.013433	0.0611446
NCU05214	89.9422	53.0409	126.843	2.39143	1.25787	0.00431032	0.0249911
NCU02528	217.364	128.281	306.446	2.38886	1.25632	0.00074253	0.00584945
NCU09843	107.318	63.4154	151.221	2.38461	1.25376	0.00613048	0.0330252
NCU08410	419.686	248.364	591.007	2.3796	1.25072	0.00283445	0.0177568
NCU00931	116.826	69.1573	164.495	2.37855	1.25009	0.0356426	0.129343
NCU03076	1373.24	813.19	1933.29	2.37742	1.2494	3.71774e-07	6.82451e-06
NCU05089	744.773	441.969	1047.58	2.37025	1.24504	2.30508e-05	0.000289369
NCU03516	567.302	337.139	797.466	2.36539	1.24208	4.827e-06	7.07258e-05
NCU09294	232.337	138.251	326.424	2.36109	1.23946	0.00041375	0.00360362
NCU04076	85.8176	51.1279	120.507	2.35698	1.23694	0.00353447	0.0212117
NCU01692	9198.33	5482.71	12914	2.3554	1.23597	0.0382988	0.136393
NCU06048	1896.29	1131.57	2661.01	2.35162	1.23365	0.00516782	0.0290623
NCU00357	2010.86	1200.45	2821.26	2.35017	1.23276	1.73057e-07	3.35393e-06
NCU03228	131.76	78.6662	184.853	2.34984	1.23256	0.001389	0.00989659
NCU06119	471.059	281.322	660.796	2.34889	1.23198	5.40452e-06	7.81287e-05
NCU01634	16281.4	9723.54	22839.2	2.34886	1.23196	0.00103235	0.00781009
NCU16402	248.24	148.291	348.189	2.34802	1.23144	9.53193e-05	0.001008
NCU17060	154.527	92.3437	216.71	2.34678	1.23068	0.0162657	0.0711231
NCU01422	10014.8	5985.78	14043.9	2.34621	1.23033	7.12369e-08	1.46836e-06
NCU04609	503.749	301.147	706.352	2.34554	1.22992	5.13213e-06	7.47462e-05
NCU08278	266.151	159.119	373.182	2.3453	1.22977	0.000102127	0.00107026
NCU09536	1286.26	769.465	1803.05	2.34325	1.22851	3.92406e-07	7.18967e-06
NCU02041	4793.24	2872.81	6713.67	2.33697	1.22464	0.000471051	0.00401301
NCU05607	145.81	87.3908	204.229	2.33696	1.22463	0.000671067	0.0053735
NCU06366	3115.16	1870.51	4359.8	2.33081	1.22083	0.000408179	0.00356228
NCU09722	304.207	182.708	425.706	2.32999	1.22032	4.60769e-05	0.000534943
NCU01485	461.663	277.565	645.761	2.32652	1.21817	0.000542512	0.00453056
NCU02244	376.377	226.31	526.444	2.32621	1.21798	0.0394183	0.139239
NCU09333	7465.15	4488.69	10441.6	2.3262	1.21798	3.72105e-05	0.000440951
NCU05623	897.396	539.793	1255	2.32496	1.21721	0.0387599	0.137333
NCU07513	451.713	272.139	631.286	2.31972	1.21395	0.0159343	0.069957
NCU06589	1066.6	642.9	1490.3	2.31808	1.21293	7.87788e-07	1.35893e-05
NCU01796	271.318	163.616	379.02	2.31651	1.21196	0.00228431	0.0148855
NCU07760	234.175	141.222	327.127	2.3164	1.21188	0.0001591	0.00156828
NCU02761	1366.89	824.612	1909.17	2.31523	1.21116	6.60784e-07	1.15005e-05
NCU08988	1330	802.41	1857.59	2.31502	1.21102	0.00421491	0.0244963
NCU03343	903.62	545.934	1261.31	2.31036	1.20812	0.00684561	0.0358455
NCU03574	190.534	115.133	265.935	2.3098	1.20777	0.000292476	0.00264698
NCU06395	177.884	107.537	248.231	2.30832	1.20685	0.0274453	0.105791
NCU00827	298.48	180.656	416.304	2.30441	1.20439	8.16623e-05	0.000876923
NCU02155	37.6421	22.7894	52.4947	2.30347	1.20381	0.0375051	0.13415
NCU02888	910.265	551.231	1269.3	2.30266	1.2033	0.029441	0.111874
NCU07430	903.469	547.2	1259.74	2.30216	1.20299	1.09854e-06	1.84188e-05
NCU01283	3954.16	2395.05	5513.27	2.30194	1.20285	2.43239e-07	4.60404e-06
NCU09477	38688	23461.1	53915	2.29806	1.20042	0.00444367	0.025642
NCU07295	272.411	165.201	379.621	2.29794	1.20034	0.000109649	0.00114216
NCU05828	1292.53	784.19	1800.88	2.29649	1.19943	3.79069e-06	5.65887e-05
NCU05354	472.644	286.868	658.42	2.2952	1.19862	1.33518e-05	0.000178191
NCU04473	2174.82	1321.28	3028.36	2.292	1.1966	4.45328e-07	8.11347e-06
NCU03383	468.389	284.563	652.214	2.29198	1.1966	0.000565626	0.00467486
NCU07853	19667.4	11971.1	27363.7	2.28582	1.19271	3.58763e-05	0.000429324
NCU01844	961.7	585.366	1338.03	2.28581	1.1927	2.22868e-06	3.50854e-05
NCU03080	716.78	436.296	997.265	2.28576	1.19267	3.53073e-06	5.30919e-05
NCU02328	1753.51	1067.82	2439.2	2.28427	1.19174	8.87252e-07	1.5144e-05
NCU08414	66.0292	40.2258	91.8327	2.28293	1.19089	0.0135535	0.0614788
NCU11030	794.45	484.973	1103.93	2.27626	1.18667	2.44992e-06	3.81451e-05
NCU01629	246.237	150.341	342.132	2.27571	1.18632	0.00286767	0.0178843
NCU06923	4049.74	2473.45	5626.03	2.27457	1.18559	3.28119e-07	6.06895e-06
NCU03240	7100.08	4336.92	9863.24	2.27425	1.18539	1.68965e-07	3.28772e-06
NCU04776	51.7844	31.6399	71.9289	2.27336	1.18483	0.0258949	0.101259
NCU02335	318.902	194.923	442.882	2.27208	1.18402	0.000241584	0.00224487
NCU04226	41.262	25.2332	57.2908	2.27045	1.18298	0.0425225	0.14679
NCU04945	687.359	420.635	954.084	2.2682	1.18155	0.000816382	0.00635802
NCU02545	537.011	328.816	745.206	2.26633	1.18036	0.000289567	0.00263223
NCU03904	1459.95	895.283	2024.61	2.26142	1.17723	1.68227e-06	2.69634e-05
NCU07822	43.4769	26.6854	60.2683	2.25847	1.17535	0.043142	0.148419
NCU06966	730.394	448.373	1012.42	2.25798	1.17503	0.00395586	0.0233677
NCU07747	2323.17	1426.45	3219.89	2.25728	1.17458	6.64401e-07	1.15428e-05
NCU02657	5192.89	3190.32	7195.46	2.25541	1.17339	2.23525e-07	4.25572e-06
NCU07375	433.663	266.593	600.734	2.25338	1.17209	0.0174786	0.07511
NCU16328	54.4618	33.4891	75.4344	2.25251	1.17153	0.0258341	0.101184
NCU01458	56.2484	34.6129	77.8839	2.25014	1.17001	0.0193368	0.0808395
NCU08274	111.997	68.9597	155.035	2.24819	1.16877	0.00261596	0.0166453
NCU02056	140.537	86.5985	194.475	2.24571	1.16717	0.00101285	0.00767668
NCU16659	77.9907	48.088	107.893	2.24367	1.16586	0.008979	0.0444563
NCU00696	1606.48	991.239	2221.73	2.24137	1.16438	6.14599e-07	1.0852e-05
NCU04069	760.888	469.847	1051.93	2.23888	1.16277	0.0342262	0.125988
NCU07276	774.505	479.096	1069.91	2.23319	1.15911	4.36943e-06	6.4312e-05
NCU06894	227.561	140.83	314.293	2.23171	1.15815	0.0062603	0.0335244
NCU01752	11613.1	7189.59	16036.7	2.23055	1.1574	1.21225e-05	0.000163578
NCU00463	499.211	309.07	689.352	2.23041	1.15731	0.00531944	0.029743
NCU03638	1379	854.144	1903.85	2.22896	1.15637	0.00429753	0.0249318
NCU08552	588.419	364.486	812.352	2.22876	1.15624	0.0427508	0.14731
NCU06007	108.543	67.2428	149.842	2.22837	1.15599	0.00352339	0.0211861
NCU00372	313.856	194.73	432.982	2.22349	1.15283	6.82788e-05	0.000751453
NCU01757	237.241	147.369	327.112	2.21968	1.15035	0.000213405	0.00201771
NCU02128	577.874	359.074	796.675	2.21869	1.14971	9.76527e-06	0.000135144
NCU07121	845.105	525.604	1164.61	2.21575	1.14779	3.29773e-06	4.98968e-05
NCU04910	6068.03	3773.98	8362.08	2.21572	1.14778	0.000232475	0.00217058
NCU06926	1049.34	652.811	1445.87	2.21484	1.1472	2.66991e-06	4.11657e-05
NCU00137	2195.74	1367.7	3023.77	2.21084	1.14459	0.0145832	0.0654429
NCU16634	847.895	528.236	1167.55	2.21029	1.14423	6.62384e-06	9.44917e-05
NCU05061	364.085	227.161	501.01	2.20553	1.14112	0.00668397	0.0351695
NCU03970	645.764	402.931	888.597	2.20533	1.141	0.000609046	0.00495689
NCU05553	285.675	178.279	393.071	2.20481	1.14065	0.00305428	0.0188548
NCU02327	199.401	124.448	274.354	2.20458	1.1405	0.00107633	0.00806129
NCU03031	1344.81	839.544	1850.08	2.20368	1.13991	0.0245407	0.0975312
NCU02636	2235.73	1395.85	3075.62	2.2034	1.13973	0.00305683	0.0188585
NCU00183	734.199	459.34	1009.06	2.19675	1.13537	0.00175391	0.0120678
NCU05561	21737.9	13607.9	29867.8	2.19489	1.13415	0.00399986	0.0235134
NCU08794	1142.18	715.496	1568.87	2.1927	1.13271	0.0130829	0.0599337
NCU00956	416.746	261.508	571.985	2.18726	1.12913	3.47046e-05	0.000416327
NCU03823	129.426	81.2455	177.607	2.18606	1.12833	0.00335619	0.0203823
NCU00599	279.017	175.244	382.789	2.18432	1.12719	0.000202746	0.00193384
NCU04845	125.217	78.738	171.696	2.1806	1.12473	0.0198333	0.08232
NCU08974	747.618	471.114	1024.12	2.17383	1.12024	5.15305e-06	7.49388e-05
NCU05009	1848.92	1165.86	2531.97	2.17176	1.11887	0.00224746	0.0147144
NCU06722	949.119	598.78	1299.46	2.17017	1.11781	8.87166e-06	0.000124909
NCU04336	847.433	536.422	1158.44	2.15958	1.11075	0.0123676	0.0573604
NCU09813	1437.41	910.289	1964.53	2.15814	1.10979	0.00114431	0.00848548
NCU04181	1325.35	840.599	1810.1	2.15335	1.10658	0.00672955	0.035371
NCU16992	125.268	79.5286	171.007	2.15026	1.10451	0.00272994	0.0172129
NCU07023	1893.36	1202.18	2584.54	2.14988	1.10426	0.00104367	0.00787735
NCU17224	243.644	154.764	332.524	2.14858	1.10339	0.00063634	0.00514199
NCU03149	155.469	98.8174	212.12	2.14658	1.10204	0.00185128	0.0126128
NCU04180	147.493	93.7943	201.193	2.14504	1.101	0.0032063	0.0195943
NCU08941	1141.38	726.658	1556.11	2.14145	1.09859	0.0357035	0.129467
NCU05540	279.504	177.949	381.059	2.14139	1.09855	0.000299912	0.00271175
NCU01764	74.8734	47.691	102.056	2.13994	1.09757	0.0151403	0.0672333
NCU02720	735.057	468.521	1001.59	2.13778	1.09611	1.94236e-05	0.000248321
NCU03067	393.252	250.674	535.831	2.13756	1.09596	0.0268405	0.103821
NCU11128	96.0535	61.2298	130.877	2.13748	1.09591	0.00982987	0.0478174
NCU08671	973.169	620.846	1325.49	2.13498	1.09422	1.15564e-05	0.000156809
NCU06749	600.906	383.578	818.234	2.13316	1.09299	0.0344314	0.126361
NCU01400	1943.28	1241.22	2645.34	2.13124	1.09169	0.0221375	0.0898147
NCU02757	995.26	635.842	1354.68	2.13053	1.09121	0.0133031	0.0607347
NCU04638	88.5359	56.6085	120.463	2.12801	1.0895	0.010082	0.0487515
NCU01013	428.063	273.728	582.398	2.12765	1.08926	0.000427072	0.00368024
NCU00788	670.658	429.149	912.166	2.12552	1.08782	2.40788e-05	0.000300336
NCU01580	169.832	108.726	230.938	2.12403	1.08681	0.00132707	0.00954258
NCU08353	144.018	92.2114	195.824	2.12364	1.08654	0.00328758	0.0200281
NCU03717	1438.22	921.521	1954.91	2.1214	1.08502	8.91992e-06	0.000125407
NCU03275	52.6059	33.7521	71.4596	2.11719	1.08215	0.042759	0.14731
NCU07509	365.027	234.223	495.831	2.11692	1.08197	0.0053912	0.029972
NCU03776	656.909	421.627	892.191	2.11607	1.08139	0.0247752	0.0982226
NCU16370	158.288	101.787	214.79	2.11018	1.07737	0.00235758	0.0152608
NCU03030	217.359	139.904	294.814	2.10726	1.07537	0.0358741	0.12994
NCU09505	668.656	430.471	906.842	2.10663	1.07494	2.77912e-05	0.000342254
NCU00977	356.814	230.002	483.627	2.10271	1.07225	0.0112528	0.0532222
NCU07560	604.256	389.588	818.924	2.10203	1.07178	5.34051e-05	0.00061055
NCU11313	631.505	407.227	855.784	2.10149	1.07141	4.07166e-05	0.000477843
NCU01272	3319.97	2142.59	4497.34	2.09902	1.06971	0.0228885	0.0921698
NCU04228	1066.32	688.604	1444.04	2.09705	1.06836	1.78567e-05	0.000230714
NCU01371	63.4078	40.9527	85.8628	2.09663	1.06807	0.0368418	0.132361
NCU16651	123.53	79.7933	167.267	2.09625	1.06781	0.00645742	0.0344223
NCU07828	362.68	234.559	490.8	2.09244	1.06518	0.00024491	0.00227142
NCU02049	316.926	205.035	428.817	2.09143	1.06449	0.000178001	0.00173005
NCU00249	448.8	290.369	607.231	2.09124	1.06436	0.00238671	0.0154185
NCU03777	1676.38	1085.53	2267.22	2.08859	1.06253	0.0155286	0.0685158
NCU08071	644.43	417.397	871.462	2.08785	1.06202	0.00997379	0.0483656
NCU16657	171.603	111.169	232.038	2.08726	1.06161	0.0201558	0.0834097
NCU08848	815.76	528.561	1102.96	2.08672	1.06124	3.97416e-05	0.000468662
NCU03125	7384.98	4787.19	9982.76	2.0853	1.06026	4.11817e-06	6.08901e-05
NCU16512	389.907	252.783	527.03	2.08491	1.05999	0.0300641	0.113811
NCU09824	520.279	337.405	703.154	2.08401	1.05936	0.0162209	0.070959
NCU11349	340.393	220.818	459.969	2.08302	1.05868	0.00804728	0.0407559
NCU08816	372.721	241.822	503.62	2.08261	1.05839	0.000161361	0.00158895
NCU03572	750.538	486.958	1014.12	2.08256	1.05836	3.07526e-05	0.000373057
NCU08946	4241.15	2753.58	5728.72	2.08046	1.05691	0.0295801	0.112328
NCU03063	186.491	121.143	251.839	2.07886	1.05579	0.00206118	0.0137069
NCU03993	108.887	70.7467	147.026	2.07821	1.05534	0.0208432	0.0854184
NCU01799	107.547	69.8859	145.207	2.07778	1.05504	0.00834886	0.0419123
NCU06694	1479.06	961.351	1996.77	2.07705	1.05454	0.000104529	0.00109233
NCU09230	334.086	217.252	450.92	2.07556	1.0535	0.000205683	0.00195229
NCU01625	458.14	298.035	618.245	2.0744	1.0527	0.000164372	0.00161533
NCU07899	106.068	69.0266	143.11	2.07325	1.0519	0.0092342	0.0454884
NCU08535	2532.8	1649.35	3416.25	2.07127	1.05052	0.000443542	0.00381203
NCU01553	270.07	175.904	364.235	2.07065	1.05008	0.000554347	0.00460961
NCU02293	303.718	198.025	409.411	2.06747	1.04786	0.00553119	0.0306334
NCU08648	125.738	82.0394	169.437	2.06532	1.04636	0.0358956	0.129969
NCU02727	1012.16	660.6	1363.71	2.06436	1.04569	0.0340168	0.125502
NCU03857	6641.43	4345.8	8937.06	2.05648	1.04018	2.76835e-06	4.24146e-05
NCU07353	169.879	111.167	228.591	2.05629	1.04004	0.0114098	0.0538604
NCU04103	245.965	161.106	330.823	2.05346	1.03805	0.000760069	0.00597794
NCU04280	393.969	258.211	529.727	2.05153	1.0367	0.00138953	0.00989659
NCU05989	3700.08	2427.36	4972.81	2.04865	1.03468	0.0299192	0.113472
NCU03261	593.088	389.253	796.923	2.04731	1.03373	0.00779342	0.0397391
NCU09539	1315.03	865.164	1764.9	2.03996	1.02854	0.00250228	0.0160374
NCU09136	2757.46	1814.76	3700.17	2.03893	1.02781	0.0193639	0.0808474
NCU00193	289.399	190.568	388.231	2.03723	1.02661	0.0127016	0.0586492
NCU06780	145.479	95.9113	195.047	2.03362	1.02405	0.00414884	0.0241846
NCU11345	2093.28	1380.27	2806.3	2.03315	1.02372	0.00109529	0.00815308
NCU03352	192.577	127.024	258.131	2.03215	1.02301	0.00231267	0.0150301
NCU09364	420.077	277.293	562.862	2.02985	1.02137	0.000225895	0.00211727
NCU06837	225.999	149.218	302.779	2.0291	1.02084	0.00117189	0.00867021
NCU07670	454.947	300.418	609.475	2.02875	1.02059	0.000139963	0.00140237
NCU02613	194.523	128.479	260.566	2.02808	1.02012	0.00166608	0.0115533
NCU06924	2736.33	1807.49	3665.17	2.02777	1.0199	0.000959624	0.00732825
NCU04498	656.897	434.043	879.751	2.02687	1.01926	7.18888e-05	0.000782333
NCU01331	810.263	535.505	1085.02	2.02616	1.01875	5.48146e-05	0.000623733
NCU03561	449.473	297.173	601.774	2.025	1.01792	0.000255944	0.00236027
NCU08338	356.095	235.618	476.573	2.02265	1.01625	0.00035968	0.003187
NCU04953	63.9627	42.3412	85.5843	2.0213	1.01528	0.0335279	0.123981
NCU05119	240.49	159.252	321.729	2.02025	1.01454	0.0285877	0.109328
NCU07266	280.237	185.677	374.796	2.01853	1.01331	0.000807323	0.00629362
NCU17008	150.617	99.8057	201.427	2.0182	1.01307	0.00494338	0.027978
NCU09264	143.976	95.516	192.436	2.0147	1.01057	0.00477316	0.0272074
NCU06362	678.931	450.421	907.442	2.01465	1.01053	0.00012563	0.0012893
NCU06693	263.214	174.646	351.783	2.01426	1.01025	0.001089	0.0081249
NCU06062	1038.78	690.472	1387.08	2.00889	1.0064	2.8284e-05	0.000347883
NCU08292	795.222	528.687	1061.76	2.00829	1.00597	0.000114682	0.00118949
NCU06385	440.466	292.947	587.986	2.00714	1.00514	0.00907701	0.0448369
NCU02679	382.746	254.773	510.719	2.00461	1.00332	0.000249487	0.00230948
NCU11085	304.618	202.848	406.389	2.00342	1.00247	0.0440656	0.15069
NCU01023	741.123	493.62	988.626	2.00281	1.00202	0.000128164	0.00130703
NCU01499	1123.76	748.719	1498.8	2.00182	1.00131	4.94927e-05	0.00057187
NCU04897	57.9847	38.6429	77.3266	2.00106	1.00076	0.0386484	0.13708
NCU08002	2589.73	1726.08	3453.37	2.00071	1.00051	0.0226776	0.091624

## Sheet: dim1_sig_DOWNregulated_genes
id	baseMean	baseMeanA	baseMeanB	foldChange	log2FoldChange	pval	padj
NCU09968	1120.9	2240.81	0.982715	0.000438553	-11.155	2.11494e-119	1.02881e-115
NCU00607	4241.13	8474.48	7.78845	0.000919048	-10.0876	9.81103e-161	9.54515e-157
NCU08052	7884.68	15749.4	19.9183	0.0012647	-9.62699	2.88683e-72	2.8086e-69
NCU16445	1012.28	2019.65	4.91357	0.00243289	-8.68312	3.57908e-106	6.96417e-103
NCU09420	746.327	1483.91	8.7418	0.00589105	-7.40726	6.29655e-86	8.7513e-83
NCU09969	75.9255	150.868	0.982715	0.00651372	-7.2623	5.08761e-23	5.21025e-21
NCU07034	259.802	515.086	4.51758	0.00877053	-6.83312	1.18041e-50	5.2201e-48
NCU09976	298.508	591.384	5.63229	0.00952393	-6.71423	4.62179e-54	2.81034e-51
NCU05084	203.115	401.874	4.35622	0.0108398	-6.52752	6.56922e-43	2.1304e-40
NCU09170	8157.69	16120	195.356	0.0121189	-6.3666	2.45928e-107	7.97544e-104
NCU07094	168.536	332.98	4.09222	0.0122897	-6.34641	4.16768e-37	9.01053e-35
NCU05567	1318.2	2604.3	32.0923	0.0123228	-6.34252	2.55029e-88	4.1353e-85
NCU10031	461.557	911.556	11.5579	0.0126794	-6.30137	1.17045e-62	8.75945e-60
NCU09775	9234.35	18234.5	234.225	0.0128452	-6.28263	1.39063e-106	3.38235e-103
NCU08438	255.678	504.712	6.64437	0.0131647	-6.24718	1.79295e-46	6.70906e-44
NCU02919	100.408	197.707	3.10951	0.0157279	-5.99053	9.87113e-22	9.41531e-20
NCU05134	1698.35	3330.16	66.5312	0.0199784	-5.64542	1.0846e-81	1.31901e-78
NCU07652	22.8512	44.7196	0.982715	0.021975	-5.50799	2.14273e-07	4.09561e-06
NCU04852	41.5411	81.2487	1.83343	0.0225657	-5.46973	8.70754e-12	3.20893e-10
NCU01958	22.1904	43.3981	0.982715	0.0226442	-5.46472	3.31966e-07	6.12846e-06
NCU02918	41.0459	80.1264	1.96543	0.0245291	-5.34936	1.34404e-11	4.80742e-10
NCU07619	81.4295	158.928	3.93086	0.0247336	-5.33739	8.22343e-20	6.10731e-18
NCU00292	54.3845	106.085	2.68415	0.0253019	-5.30461	3.58138e-14	1.79605e-12
NCU00732	5165.94	10069.6	262.284	0.0260471	-5.26274	1.69577e-46	6.59925e-44
NCU09358	69.7847	135.477	4.09222	0.030206	-5.04902	1.48907e-16	9.11145e-15
NCU09630	38.2857	74.3127	2.25879	0.0303957	-5.03999	2.75385e-10	8.07937e-09
NCU05980	31.0375	60.2415	1.83343	0.0304347	-5.03814	8.39891e-09	1.993e-07
NCU07067	101.912	197.765	6.05765	0.0306305	-5.02889	7.65135e-22	7.59592e-20
NCU09906	2382.46	4614.32	150.606	0.0326389	-4.93727	2.02857e-68	1.79418e-65
NCU04721	439.674	851.055	28.2935	0.0332452	-4.91071	2.60942e-47	1.10378e-44
NCU05598	22215	42983.6	1446.31	0.0336479	-4.89334	3.05675e-78	3.30434e-75
NCU09773	465.849	901.336	30.3615	0.033685	-4.89175	5.73687e-25	6.80659e-23
NCU07033	4488.43	8673.73	303.119	0.0349467	-4.8387	7.92072e-61	5.50434e-58
NCU05069	398.845	770.745	26.9441	0.0349585	-4.83821	2.02161e-20	1.56097e-18
NCU09235	22234.7	42892.9	1576.46	0.0367533	-4.76598	2.3154e-37	5.23873e-35
NCU08057	214.806	413.567	16.0462	0.0387994	-4.68782	3.08846e-32	5.27151e-30
NCU02369	10886.4	20891.9	880.793	0.0421595	-4.568	3.22556e-32	5.4106e-30
NCU06961	397.671	761.797	33.5446	0.0440335	-4.50526	7.22476e-40	1.8023e-37
NCU08290	111.809	214.084	9.53379	0.0445328	-4.48899	5.18364e-21	4.34755e-19
NCU03646	3509.58	6713.52	305.64	0.045526	-4.45717	2.25663e-63	1.82957e-60
NCU05639	199.494	381.476	17.513	0.0459085	-4.4451	3.59102e-16	2.14338e-14
NCU02920	35.3754	67.6413	3.10951	0.0459705	-4.44315	1.6179e-08	3.70366e-07
NCU08037	34.5481	65.9867	3.10951	0.0471233	-4.40742	1.84199e-08	4.15795e-07
NCU05143	962.602	1838.11	87.0953	0.0473831	-4.39948	1.80286e-51	9.2316e-49
NCU06861	566.335	1079.4	53.2721	0.0493536	-4.3407	6.27651e-44	2.18086e-41
NCU09024	1806.05	3435.39	176.699	0.0514348	-4.28111	8.67942e-55	5.62947e-52
NCU09287	291.748	554.601	28.895	0.0521005	-4.26256	6.1193e-32	1.00906e-29
NCU09023	149.765	284.627	14.9021	0.0523565	-4.25549	1.39257e-23	1.50536e-21
NCU07226	9.80575	18.6288	0.982715	0.0527525	-4.24462	0.00585537	0.0318607
NCU08173	1902.78	3603.66	201.897	0.0560255	-4.15777	5.76117e-54	3.29708e-51
NCU09267	1842.33	3486.4	198.26	0.0568668	-4.13627	2.86977e-51	1.396e-48
NCU02322	618.478	1169.24	67.7195	0.0579177	-4.10985	4.95548e-42	1.46097e-39
NCU11417	389.453	736.092	42.8144	0.0581644	-4.10372	6.14063e-21	5.06289e-19
NCU05142	32.9964	62.3553	3.6375	0.0583351	-4.09949	6.4658e-08	1.35281e-06
NCU05394	2457.07	4638.15	275.998	0.0595061	-4.07082	7.26156e-52	3.92487e-49
NCU02317	260.986	491.978	29.9949	0.060968	-4.0358	2.5723e-29	3.62695e-27
NCU07976	108.374	204.046	12.702	0.0622507	-4.00577	3.18262e-17	2.02377e-15
NCU02903	422.71	795.229	50.192	0.0631164	-3.98584	3.32056e-35	6.46115e-33
NCU08172	165.465	311.246	19.6837	0.0632416	-3.98298	4.4513e-23	4.6071e-21
NCU08643	1993.7	3748.87	238.536	0.0636288	-3.97418	8.04191e-51	3.7257e-48
NCU07723	1077.83	2025.77	129.895	0.0641213	-3.96305	1.56645e-44	5.64445e-42
NCU02188	89.0592	167.382	10.7366	0.0641444	-3.96253	5.9002e-15	3.22489e-13
NCU09776	102.263	192.087	12.438	0.064752	-3.94893	3.06527e-16	1.8523e-14
NCU00653	15.3823	28.7992	1.96543	0.0682459	-3.87311	0.000374919	0.00330099
NCU04205	1120.23	2096.86	143.595	0.0684811	-3.86815	1.24645e-24	1.42667e-22
NCU02022	93.1023	174.251	11.9539	0.0686019	-3.86561	2.03529e-15	1.15124e-13
NCU11340	21.3568	39.8974	2.81615	0.0705847	-3.8245	4.35854e-05	0.000509054
NCU06513	75.3392	140.69	9.98851	0.0709966	-3.81611	7.21736e-08	1.48452e-06
NCU06143	24.4102	45.5788	3.2415	0.0711186	-3.81363	1.52869e-05	0.000201799
NCU01416	16.817	31.3753	2.25879	0.0719926	-3.79601	0.00031345	0.00282628
NCU05767	12.9714	24.1093	1.83343	0.0760465	-3.71697	0.00182012	0.0124528
NCU06265	3951.91	7343.21	560.605	0.0763433	-3.71136	3.06348e-47	1.24186e-44
NCU03771	6616.9	12293.5	940.318	0.0764891	-3.7086	2.45111e-10	7.27038e-09
NCU01092	699.827	1299.55	100.105	0.077031	-3.69842	1.4735e-36	3.11646e-34
NCU07107	6.86621	12.7497	0.982715	0.0770775	-3.69755	0.041656	0.14458
NCU07138	282.638	524.413	40.8635	0.0779223	-3.68182	1.32584e-26	1.74312e-24
NCU04211	481.109	892.181	70.037	0.0785009	-3.67115	4.24877e-33	7.65488e-31
NCU08793	1385.22	2568.4	202.044	0.0786652	-3.66813	2.43431e-42	7.63982e-40
NCU00937	222.543	412.51	32.5764	0.0789712	-3.66253	1.45332e-23	1.55378e-21
NCU10110	24.8197	45.9726	3.66686	0.079762	-3.64816	1.83529e-05	0.000236498
NCU16913	23.6299	43.7249	3.53487	0.0808433	-3.62873	0.00336827	0.0204174
NCU07053	526.329	973.851	78.8082	0.0809243	-3.62728	6.73475e-33	1.19132e-30
NCU07449	35.2201	65.1306	5.30957	0.0815218	-3.61667	2.53695e-07	4.79261e-06
NCU04667	1009.84	1866.98	152.703	0.0817911	-3.61191	4.01013e-39	9.75365e-37
NCU10055	160.698	296.975	24.4213	0.0822336	-3.60413	2.24041e-19	1.62663e-17
NCU09429	194.402	358.809	29.9949	0.0835957	-3.58043	1.71853e-21	1.57732e-19
NCU05133	1844.03	3400.56	287.495	0.0845434	-3.56416	1.85379e-43	6.21916e-41
NCU02653	37.9711	70.0166	5.92565	0.0846322	-3.56265	3.14304e-07	5.85797e-06
NCU09424	287.418	529.895	44.9412	0.0848114	-3.5596	6.54063e-25	7.66672e-23
NCU09559	16541.8	30496.7	2586.93	0.0848267	-3.55934	2.48763e-38	5.76242e-36
NCU09074	50.6106	93.1981	8.02308	0.0860863	-3.53807	1.24063e-05	0.000166944
NCU02858	248.703	457.818	39.5874	0.0864698	-3.53166	5.81231e-24	6.49977e-22
NCU09293	12.2451	22.5248	1.96543	0.0872563	-3.5186	0.00331377	0.0201498
NCU09491	58.0096	106.617	9.40179	0.0881825	-3.50336	3.62743e-05	0.000433022
NCU08842	1097.04	2014.08	179.999	0.0893702	-3.48406	3.96015e-19	2.81229e-17
NCU09994	325.91	598.108	53.712	0.0898033	-3.47709	3.51464e-18	2.4251e-16
NCU04952	67.2436	123.325	11.162	0.0905082	-3.46581	2.7959e-10	8.16855e-09
NCU09964	159.976	292.553	27.3988	0.0936543	-3.41651	9.59956e-18	6.39686e-16
NCU07485	68.3986	124.975	11.8219	0.0945943	-3.4021	1.57572e-10	4.77575e-09
NCU02921	10.5611	19.2888	1.83343	0.0950519	-3.39514	0.0103938	0.0499857
NCU05852	76.8438	140.296	13.3914	0.0954508	-3.3891	2.34862e-11	8.01744e-10
NCU01111	31.4513	57.4024	5.50029	0.09582	-3.38353	7.60969e-06	0.000107765
NCU09169	1504.7	2745.09	264.322	0.0962892	-3.37648	3.2344e-37	7.15169e-35
NCU07022	24.0423	43.8604	4.22422	0.0963106	-3.37616	6.98106e-05	0.00076399
NCU07232	166641	303790	29493	0.0970835	-3.36463	2.51418e-42	7.64389e-40
NCU01108	160.141	291.828	28.4548	0.0975056	-3.35837	1.12547e-17	7.44878e-16
NCU05097	7.90464	14.4012	1.40807	0.0977747	-3.3544	0.0497721	0.164817
NCU05964	4893.54	8914.69	872.39	0.0978598	-3.35314	5.1613e-36	1.02478e-33
NCU09702	2963.18	5397.47	528.893	0.0979891	-3.35124	6.67699e-40	1.70949e-37
NCU07626	30.0638	54.7593	5.3683	0.0980344	-3.35057	1.44397e-05	0.000191395
NCU00697	16.3368	29.7254	2.94814	0.0991793	-3.33382	0.0010824	0.00808842
NCU17138	17.9365	32.6315	3.2415	0.0993368	-3.33153	0.000728297	0.00576065
NCU07095	17.177	31.2446	3.10951	0.0995215	-3.32885	0.00115239	0.00853241
NCU01735	6434.06	11702	1166.16	0.0996554	-3.32691	2.24023e-41	6.41035e-39
NCU01348	3004.15	5458.07	550.232	0.100811	-3.31028	9.68863e-41	2.61835e-38
NCU09717	9.96649	18.0995	1.83343	0.101297	-3.30333	0.0147236	0.0658906
NCU09904	785.335	1425.07	145.604	0.102174	-3.2909	1.79338e-30	2.6436e-28
NCU02654	62.4651	113.343	11.5873	0.102232	-3.29008	0.000379123	0.00333197
NCU08791	7913.74	14351	1476.44	0.10288	-3.28096	5.67803e-41	1.57833e-38
NCU05888	14.9166	27.017	2.81615	0.104236	-3.26207	0.00245745	0.0158149
NCU05153	377.218	682.726	71.7091	0.105033	-3.25108	2.20559e-25	2.68227e-23
NCU09421	205.923	372.479	39.3673	0.10569	-3.24209	1.3171e-19	9.70764e-18
NCU05691	321.652	581.803	61.5005	0.105707	-3.24186	7.41199e-24	8.19446e-22
NCU08179	124.162	224.519	23.8052	0.106028	-3.23749	1.97706e-14	1.01772e-12
NCU07076	9.53687	17.2403	1.83343	0.106346	-3.23317	0.018049	0.0768823
NCU05395	165378	298610	32145.6	0.107651	-3.21557	1.77082e-40	4.65629e-38
NCU08907	176768	319028	34508.2	0.108167	-3.20867	7.01984e-39	1.66576e-36
NCU07622	40.3088	72.7266	7.89108	0.108503	-3.20419	1.28209e-06	2.12134e-05
NCU05897	27629.2	49780.4	5477.88	0.110041	-3.18389	3.05695e-19	2.18685e-17
NCU02904	2373.61	4276.27	470.943	0.110129	-3.18273	3.77107e-35	7.19387e-33
NCU08487	2366.86	4263.68	470.033	0.110241	-3.18127	5.0515e-36	1.02388e-33
NCU05844	739.419	1330.32	148.522	0.111644	-3.16302	1.00062e-29	1.45299e-27
NCU01057	49.2835	88.5784	9.98851	0.112765	-3.14861	1.24713e-07	2.46113e-06
NCU07124	13.7608	24.7055	2.81615	0.113988	-3.13304	0.00519485	0.0291974
NCU10537	102.607	183.828	21.3851	0.116332	-3.10368	2.76869e-12	1.10396e-10
NCU03322	37.5351	67.1791	7.89108	0.117463	-3.08972	5.82307e-06	8.38056e-05
NCU09279	8.64577	15.4581	1.83343	0.118607	-3.07574	0.0497365	0.164755
NCU07325	1112.42	1987.85	236.983	0.119215	-3.06836	1.68443e-29	2.40997e-27
NCU09103	90.8114	162.1	19.5223	0.120433	-3.05369	3.85667e-11	1.26762e-09
NCU09425	693.532	1237.79	149.271	0.120594	-3.05177	2.42611e-27	3.32445e-25
NCU02329	65.2195	116.388	14.0514	0.120729	-3.05016	5.63277e-09	1.37346e-07
NCU07927	40.9978	73.1219	8.8738	0.121356	-3.04268	2.40166e-06	3.75964e-05
NCU06328	362.225	645.818	78.6323	0.121756	-3.03793	9.54349e-22	9.19293e-20
NCU03641	4792.43	8544.47	1040.4	0.121763	-3.03785	2.6843e-36	5.55651e-34
NCU04539	310.081	552.355	67.8073	0.12276	-3.02608	1.76812e-21	1.59279e-19
NCU01112	136.205	242.547	29.8629	0.123122	-3.02184	5.64784e-14	2.73372e-12
NCU04556	155.054	274.642	35.4658	0.129135	-2.95305	1.68943e-05	0.000219445
NCU01109	16.5629	29.3269	3.79886	0.129535	-2.94858	0.00234847	0.0152119
NCU08739	1589.15	2809.33	368.973	0.131338	-2.92864	6.5004e-31	9.88162e-29
NCU07099	13.2313	23.3824	3.08014	0.131729	-2.92436	0.00581994	0.0317923
NCU05668	18.658	32.9599	4.35622	0.132167	-2.91956	0.00126546	0.00918527
NCU07569	160378	283134	37622.2	0.132877	-2.91183	1.92866e-33	3.54036e-31
NCU09526	427.481	754.152	100.809	0.133673	-2.90323	1.1001e-21	1.02913e-19
NCU05819	137.744	242.941	32.547	0.133971	-2.90001	1.20527e-10	3.7344e-09
NCU08189	7.75306	13.6727	1.83343	0.134094	-2.89868	0.0494553	0.164159
NCU05146	69.236	122.001	16.4715	0.135012	-2.88884	1.32649e-08	3.08741e-07
NCU05137	99685.3	175600	23770.8	0.135369	-2.88503	1.10787e-32	1.92473e-30
NCU05135	400.694	705.787	95.6024	0.135455	-2.88411	3.39257e-21	2.92091e-19
NCU01430	2271.97	4001.54	542.403	0.135548	-2.88312	1.44664e-12	5.93856e-11
NCU07921	418.814	736.306	101.323	0.137609	-2.86135	1.04123e-21	9.83506e-20
NCU08545	72.4863	127.416	17.5569	0.137792	-2.85944	5.31209e-09	1.3018e-07
NCU17083	153.614	269.958	37.2699	0.138058	-2.85665	4.6855e-14	2.29072e-12
NCU06524	12651.5	22179.8	3123.22	0.140814	-2.82814	1.07026e-31	1.70698e-29
NCU05483	11.3498	19.8834	2.81615	0.141633	-2.81977	0.0206169	0.0847769
NCU09099	35.0054	61.2984	8.71243	0.142132	-2.8147	2.91497e-05	0.000356278
NCU09277	35.052	61.3621	8.7418	0.142462	-2.81135	3.32291e-05	0.000401597
NCU08095	816.144	1427.85	204.435	0.143177	-2.80413	6.97857e-20	5.22266e-18
NCU04623	58.5744	102.452	14.6968	0.143451	-2.80137	5.61122e-07	9.99845e-06
NCU07349	191.865	335.489	48.2411	0.143794	-2.79793	3.68682e-15	2.04966e-13
NCU09335	2213.96	3867.28	560.634	0.144968	-2.78619	1.21306e-20	9.5176e-19
NCU04343	57799.1	100907	14691.4	0.145593	-2.77998	8.51079e-32	1.38002e-29
NCU02849	14.9122	26.0255	3.79886	0.145967	-2.77629	0.00685673	0.0358708
NCU06373	399.317	696.329	102.306	0.146921	-2.76688	6.39041e-12	2.42861e-10
NCU07787	439489	766058	112920	0.147404	-2.76215	4.95114e-31	7.7693e-29
NCU08784	843.934	1470.29	217.576	0.147981	-2.75651	1.20458e-25	1.50249e-23
NCU03753	21558.8	37540.4	5577.32	0.148569	-2.7508	1.62168e-25	1.99713e-23
NCU09511	54.6152	94.9883	14.2421	0.149935	-2.73759	1.45686e-06	2.37417e-05
NCU00716	48901.8	85048.7	12755	0.149973	-2.73723	6.99053e-12	2.63608e-10
NCU01861	1391.49	2419.21	363.768	0.150366	-2.73345	1.29831e-16	7.99449e-15
NCU00845	16.0829	27.9416	4.22422	0.15118	-2.72566	0.00623877	0.0334603
NCU09285	45389.7	78852.6	11926.8	0.151255	-2.72495	1.33343e-30	1.99584e-28
NCU04197	3795.93	6593.09	998.766	0.151487	-2.72273	1.27121e-26	1.69419e-24
NCU06506	719.58	1248.41	190.75	0.152794	-2.71034	9.72324e-24	1.06289e-21
NCU08347	536.524	930.583	142.465	0.153092	-2.70753	1.7376e-21	1.57992e-19
NCU07333	146.503	254.049	38.9568	0.153344	-2.70516	7.63873e-12	2.8474e-10
NCU17137	15.7374	27.28	4.19485	0.15377	-2.70115	0.00442194	0.0255318
NCU04675	4827.35	8366.82	1287.87	0.153926	-2.69969	2.02028e-28	2.8079e-26
NCU04430	1310.85	2271.64	350.053	0.154097	-2.69809	8.35094e-26	1.06903e-23
NCU08747	1458.13	2526.57	389.685	0.154235	-2.6968	3.45958e-14	1.74395e-12
NCU02042	36.422	63.0168	9.82715	0.155945	-2.68089	4.27772e-05	0.000500215
NCU03952	610.863	1055.88	165.845	0.157068	-2.67054	2.26886e-21	1.98863e-19
NCU11260	3418.2	5905.67	930.738	0.157601	-2.66565	4.4114e-27	5.96091e-25
NCU07088	116.766	201.733	31.799	0.157629	-2.6654	1.52473e-10	4.6502e-09
NCU08856	65.31	112.814	17.8063	0.157838	-2.66348	0.00694567	0.0362308
NCU16875	808.146	1394.9	221.39	0.158714	-2.6555	8.73449e-13	3.6787e-11
NCU07931	240.971	415.748	66.194	0.159217	-2.65094	1.18076e-15	6.7974e-14
NCU07905	27.0507	46.6357	7.46572	0.160086	-2.64308	0.00061295	0.00498195
NCU16443	148.781	256.421	41.142	0.160447	-2.63983	2.00238e-12	8.08346e-11
NCU09957	50.4043	86.86	13.9487	0.160589	-2.63856	4.09177e-06	6.05918e-05
NCU05557	22.9258	39.5005	6.35101	0.160783	-2.63681	0.00160484	0.0111925
NCU09181	10.6227	18.2972	2.94814	0.161125	-2.63374	0.0287341	0.109762
NCU02713	13833.4	23813.3	3853.56	0.161824	-2.6275	3.62475e-21	3.09344e-19
NCU07825	35.1486	60.4407	9.85651	0.163077	-2.61637	0.000110593	0.00115076
NCU17244	23.4539	40.2928	6.61501	0.164174	-2.60671	0.00124282	0.00908446
NCU02690	915.401	1569.58	261.227	0.166432	-2.587	5.17197e-22	5.18743e-20
NCU09209	16.1821	27.7439	4.62021	0.166531	-2.58614	0.00674147	0.0354146
NCU01459	2752.4	4717.79	787.01	0.166818	-2.58366	8.62411e-26	1.08966e-23
NCU06938	11.3313	19.4211	3.2415	0.166907	-2.58289	0.0333905	0.123614
NCU07332	493.801	845.769	141.834	0.167699	-2.57606	1.03329e-18	7.2847e-17
NCU00585	15972.4	27354.6	4590.16	0.167802	-2.57517	1.93949e-17	1.24962e-15
NCU05341	225.756	386.417	65.0938	0.168455	-2.56957	7.22174e-15	3.90335e-13
NCU00837	107.324	183.627	31.0215	0.168937	-2.56544	5.43618e-10	1.52417e-08
NCU05649	60.5771	103.641	17.513	0.168977	-2.5651	2.4755e-06	3.84731e-05
NCU03868	93.2857	159.583	26.988	0.169116	-2.56392	4.86363e-09	1.19793e-07
NCU06131	441.804	755.591	128.017	0.169426	-2.56127	1.21121e-18	8.47758e-17
NCU11395	3128.87	5340.23	917.508	0.17181	-2.54111	7.93375e-25	9.18898e-23
NCU06153	480	819.149	140.852	0.171949	-2.53995	4.87407e-16	2.87393e-14
NCU01223	137.227	234.162	40.2913	0.172066	-2.53897	3.35142e-11	1.12048e-09
NCU07661	216.766	369.641	63.8913	0.172847	-2.53243	1.16122e-13	5.32903e-12
NCU02100	486.002	828.38	143.624	0.173379	-2.528	3.93873e-18	2.67971e-16
NCU03847	27.1301	46.2372	8.02308	0.17352	-2.52683	0.000717945	0.00568801
NCU09759	144.036	245.39	42.6821	0.173936	-2.52337	1.90191e-11	6.65599e-10
NCU03388	18728.4	31906.9	5549.79	0.173937	-2.52336	2.4704e-20	1.89248e-18
NCU04480	687.748	1170.81	204.685	0.174823	-2.51603	2.56759e-19	1.85038e-17
NCU05157	883.93	1504.32	263.545	0.175193	-2.51299	9.75864e-21	7.78212e-19
NCU04451	2039.39	3469.66	609.123	0.175557	-2.50999	1.8182e-08	4.11379e-07
NCU04883	20.2357	34.4137	6.05765	0.176024	-2.50615	0.0037657	0.0224214
NCU07113	138.253	235.085	41.4208	0.176195	-2.50476	1.34874e-10	4.13939e-09
NCU08720	38251.1	65020.2	11482.1	0.176593	-2.5015	4.05655e-26	5.26216e-24
NCU09211	10.1602	17.2403	3.08014	0.178659	-2.48472	0.0379785	0.135594
NCU07767	25.6594	43.5304	7.78845	0.17892	-2.48262	0.00215327	0.0142028
NCU07049	2102.9	3566.55	639.251	0.179235	-2.48007	1.34185e-17	8.82082e-16
NCU07098	487.033	825.603	148.464	0.179825	-2.47534	5.91504e-18	3.99635e-16
NCU08880	152.089	257.741	46.437	0.18017	-2.47257	3.85248e-11	1.26762e-09
NCU07484	52.9361	89.6353	16.2369	0.181144	-2.46479	1.36672e-05	0.000182148
NCU07355	65.1943	110.177	20.2117	0.183447	-2.44656	8.00333e-07	1.37327e-05
NCU04991	34.437	58.1962	10.6779	0.18348	-2.4463	0.000275936	0.00253024
NCU08797	11.7751	19.8834	3.66686	0.184419	-2.43894	0.0395614	0.139606
NCU09278	1103.9	1863.91	343.893	0.184501	-2.4383	8.03554e-21	6.46097e-19
NCU00399	182788	308567	57008.6	0.184753	-2.43633	7.65089e-17	4.77151e-15
NCU04994	27.0463	45.6442	8.44844	0.185093	-2.43367	0.0012883	0.00933277
NCU09027	38.2923	64.6014	11.9833	0.185496	-2.43054	0.000171092	0.00167124
NCU06427	469.569	792.17	146.968	0.185526	-2.4303	1.99386e-05	0.000253904
NCU05854	1286.38	2170.06	402.709	0.185575	-2.42993	8.21361e-22	8.07173e-20
NCU07142	545.769	919.928	171.609	0.186546	-2.4224	7.8177e-18	5.24541e-16
NCU06137	3669.19	6179.57	1158.81	0.187524	-2.41486	1.5732e-23	1.66366e-21
NCU06305	20316.9	34204.5	6429.34	0.187968	-2.41144	2.37035e-24	2.68152e-22
NCU04932	312.896	526.538	99.2545	0.188504	-2.40733	1.62919e-06	2.62424e-05
NCU07130	14.2154	23.9133	4.51758	0.188915	-2.40419	0.027069	0.104506
NCU07657	201.015	338.066	63.9646	0.189207	-2.40196	2.49317e-12	9.98193e-11
NCU01231	124.409	209.202	39.6168	0.189371	-2.40071	6.27713e-06	8.99414e-05
NCU00322	3028.03	5089.64	966.412	0.189878	-2.39686	5.35402e-12	2.05076e-10
NCU16683	470.362	790.059	150.664	0.190699	-2.39063	1.133e-13	5.24904e-12
NCU09342	12.2706	20.6103	3.93086	0.190723	-2.39045	0.0334323	0.123674
NCU07977	30.6744	51.5217	9.82715	0.190738	-2.39034	0.000503133	0.00423441
NCU05834	25.3143	42.4735	8.15508	0.192004	-2.38079	0.0019763	0.0132603
NCU17258	412.517	692.045	132.99	0.192169	-2.37955	3.81279e-16	2.26187e-14
NCU04295	1535.64	2576.05	495.232	0.192245	-2.37899	1.04173e-20	8.23987e-19
NCU16713	124.238	208.331	40.1448	0.192697	-2.3756	2.60951e-09	6.64605e-08
NCU09057	1360.92	2282	439.847	0.192746	-2.37523	1.91232e-20	1.4884e-18
NCU05838	821.354	1377.21	265.495	0.192777	-2.37499	3.4869e-16	2.09408e-14
NCU07964	107.322	179.867	34.7765	0.193346	-2.37075	1.94601e-08	4.38258e-07
NCU07817	78633.1	131607	25659.2	0.194968	-2.35869	9.25172e-13	3.86309e-11
NCU08155	2162.07	3617.04	707.1	0.195491	-2.35482	6.76102e-23	6.85187e-21
NCU08610	6224.69	10411.3	2038.12	0.195762	-2.35283	1.94558e-23	2.03533e-21
NCU11424	2186.1	3649.94	722.254	0.197881	-2.3373	2.57948e-21	2.24069e-19
NCU08735	24.1906	40.3581	8.02308	0.198797	-2.33063	0.00270822	0.0170871
NCU11053	407.755	679.895	135.615	0.199465	-2.3258	1.6027e-15	9.11849e-14
NCU12057	59.3312	98.8174	19.845	0.200825	-2.31599	1.03961e-05	0.000143262
NCU08752	189.743	315.609	63.8767	0.202392	-2.30477	9.21645e-11	2.88318e-09
NCU07185	11.2792	18.7595	3.79886	0.202503	-2.30398	0.0467197	0.157116
NCU06525	66.2569	110.175	22.3384	0.202753	-2.3022	2.45048e-06	3.81451e-05
NCU00988	330.598	549.562	111.634	0.203133	-2.2995	3.95092e-06	5.85953e-05
NCU07143	271.267	450.82	91.7152	0.203441	-2.29732	2.22886e-13	9.90163e-12
NCU07737	2030.75	3370.61	690.881	0.204972	-2.2865	6.29223e-20	4.74551e-18
NCU01210	81.0619	134.417	27.7067	0.206125	-2.27841	5.64106e-07	1.00332e-05
NCU04510	3309.66	5486.65	1132.68	0.206443	-2.27619	7.86777e-21	6.37879e-19
NCU05183	174.685	289.454	59.9165	0.206998	-2.27231	4.70889e-10	1.32791e-08
NCU03773	6311.64	10452	2171.28	0.207738	-2.26716	2.1834e-21	1.94884e-19
NCU11342	18.8303	31.1776	6.48301	0.207938	-2.26578	0.0113914	0.0537997
NCU03651	6903.19	11423.6	2382.81	0.208587	-2.26128	1.33774e-13	6.11029e-12
NCU01451	6023.35	9966.26	2080.44	0.208749	-2.26016	4.2226e-21	3.57232e-19
NCU00175	10447.6	17284.2	3610.91	0.208914	-2.25902	1.551e-12	6.31367e-11
NCU09857	58.7156	97.1021	20.3291	0.209358	-2.25596	3.45991e-05	0.000415908
NCU07815	216.542	358.076	75.009	0.209478	-2.25513	7.52306e-12	2.81507e-10
NCU12034	12.9454	21.4025	4.48822	0.209705	-2.25357	0.034475	0.126389
NCU00412	214.61	354.709	74.5104	0.210061	-2.25112	1.41748e-11	5.05154e-10
NCU08557	52.5359	86.7962	18.2756	0.210557	-2.24771	4.02704e-05	0.000474323
NCU04478	53.0421	87.5885	18.4957	0.211166	-2.24355	6.88207e-05	0.000754343
NCU07620	31.4449	51.9186	10.9712	0.211316	-2.24253	0.00109401	0.00814978
NCU05161	458.8	757.504	160.095	0.211345	-2.24233	4.7851e-15	2.63018e-13
NCU05948	189.527	312.903	66.1498	0.211406	-2.24191	3.46688e-11	1.1538e-09
NCU07823	68.0349	112.294	23.7759	0.211729	-2.23971	6.43499e-06	9.20677e-05
NCU06010	198.079	326.635	69.5236	0.212848	-2.23211	7.40439e-11	2.34649e-09
NCU02579	585.642	965.647	205.637	0.212953	-2.23139	8.13745e-16	4.74067e-14
NCU07267	4138.99	6822.92	1455.05	0.213259	-2.22932	2.24055e-21	1.98166e-19
NCU04720	26342.3	43421.4	9263.22	0.213333	-2.22882	8.86953e-22	8.62917e-20
NCU07798	263.783	434.765	92.8008	0.21345	-2.22803	3.49226e-12	1.37001e-10
NCU05148	313.147	515.95	110.343	0.213864	-2.22523	8.79128e-13	3.68665e-11
NCU01214	122.332	201.528	43.1368	0.214049	-2.22399	1.15357e-08	2.71088e-07
NCU12026	39.1102	64.4037	13.8167	0.214533	-2.22073	0.000492139	0.00415627
NCU06327	8373.98	13787	2960.93	0.214762	-2.21919	5.77744e-21	4.80416e-19
NCU02769	15.5317	25.5632	5.50029	0.215165	-2.21649	0.0257702	0.101015
NCU04879	217.963	358.482	77.444	0.216033	-2.21068	7.08595e-11	2.25291e-09
NCU07224	11.888	19.5518	4.22422	0.216053	-2.21054	0.0479189	0.160152
NCU08750	2183.06	3587.62	778.49	0.216993	-2.20428	6.15707e-09	1.4901e-07
NCU01077	36.9187	60.6368	13.2006	0.2177	-2.19959	0.000421227	0.00364913
NCU08763	356.219	584.51	127.929	0.218866	-2.19188	1.14198e-13	5.26557e-12
NCU12125	55.5176	91.0875	19.9477	0.218994	-2.19103	2.90721e-05	0.000355777
NCU04265	43260.1	70973.5	15546.6	0.219048	-2.19068	7.10764e-21	5.81094e-19
NCU07806	231.685	380.073	83.2961	0.219158	-2.18995	1.19322e-11	4.31556e-10
NCU09075	215.237	352.721	77.7522	0.220435	-2.18157	9.97181e-07	1.6843e-05
NCU09416	20.6424	33.8191	7.46572	0.220755	-2.17948	0.0094563	0.0463329
NCU09210	88.0435	144.2	31.8868	0.221129	-2.17704	5.12732e-07	9.25486e-06
NCU05209	44.5978	72.988	16.2075	0.222057	-2.171	0.000218855	0.00206103
NCU04871	64.6326	105.753	23.5119	0.222328	-2.16924	1.78848e-05	0.000230771
NCU08699	8993.84	14714.7	3272.96	0.222427	-2.16859	3.7581e-18	2.57483e-16
NCU03604	132.44	216.654	48.2266	0.222597	-2.16749	2.87694e-08	6.31822e-07
NCU07422	215.132	351.734	78.5291	0.223262	-2.16319	2.2067e-11	7.58622e-10
NCU09669	25.2444	41.2189	9.26979	0.224892	-2.1527	0.00453129	0.0261012
NCU16720	58.4284	95.3837	21.4732	0.225124	-2.15121	7.83653e-05	0.000846189
NCU05047	106.012	172.995	39.0301	0.225614	-2.14807	3.06106e-07	5.72712e-06
NCU11067	111.966	182.703	41.2301	0.225668	-2.14773	1.15603e-07	2.28598e-06
NCU07293	1573.44	2563.71	583.163	0.227468	-2.13626	4.00629e-17	2.53098e-15
NCU02238	21.9459	35.7368	8.15508	0.228198	-2.13164	0.00973073	0.0474062
NCU01870	166.701	271.286	62.1166	0.228971	-2.12676	4.78572e-09	1.18474e-07
NCU06484	547.463	888.893	206.033	0.231786	-2.10913	1.68873e-14	8.7859e-13
NCU16721	206.063	334.432	77.6935	0.232315	-2.10585	9.51066e-10	2.58462e-08
NCU08715	329.905	535.241	124.57	0.232737	-2.10323	4.53352e-12	1.75026e-10
NCU00642	6660.36	10784.9	2535.84	0.235129	-2.08847	3.08129e-09	7.74623e-08
NCU06326	1769.41	2864.04	674.79	0.235608	-2.08554	5.70636e-17	3.58175e-15
NCU16917	61.0138	98.7504	23.2773	0.235718	-2.08487	6.53723e-05	0.000723558
NCU07938	125.199	202.583	47.8158	0.236031	-2.08295	6.60181e-08	1.37831e-06
NCU16852	74.4346	120.414	28.4548	0.236307	-2.08126	1.0767e-05	0.000147747
NCU08114	93.3995	151.069	35.7298	0.236513	-2.08001	1.96877e-06	3.11958e-05
NCU04415	5413.17	8754.24	2072.1	0.236697	-2.07889	5.74289e-14	2.76597e-12
NCU09714	507.698	820.92	194.475	0.236899	-2.07765	1.36085e-13	6.18676e-12
NCU00250	28.2744	45.7096	10.8392	0.237133	-2.07623	0.00398766	0.0234604
NCU07582	49.5089	79.9941	19.0237	0.237813	-2.0721	0.000308881	0.00278766
NCU04691	19.8312	32.0353	7.62709	0.238084	-2.07046	0.0170349	0.0735934
NCU03471	2211.88	3570.19	853.572	0.239083	-2.06441	7.7584e-17	4.80774e-15
NCU01899	322.619	520.17	125.069	0.240439	-2.05626	7.86058e-12	2.91891e-10
NCU09451	92.674	149.413	35.9351	0.240509	-2.05584	1.16133e-06	1.93138e-05
NCU08166	153.564	247.505	59.6232	0.240897	-2.05351	3.61979e-08	7.86093e-07
NCU07133	57.3853	92.476	22.2945	0.241085	-2.05239	0.000136171	0.0013757
NCU06312	387.418	624.275	150.561	0.241178	-2.05183	2.9406e-12	1.16772e-10
NCU01068	2449.44	3944.57	954.31	0.24193	-2.04734	0.000188092	0.00181363
NCU05166	56.977	91.7475	22.2064	0.242039	-2.04669	7.04057e-05	0.000769637
NCU16710	143.097	230.136	56.0589	0.243591	-2.03747	8.58822e-08	1.73711e-06
NCU03192	2108.82	3391.13	826.508	0.243726	-2.03667	1.45138e-17	9.47681e-16
NCU09729	77.7989	125.104	30.4935	0.243745	-2.03656	7.21974e-06	0.000102541
NCU09344	14.9701	24.044	5.89629	0.245229	-2.0278	0.0358702	0.12994
NCU08165	156.492	251.337	61.6473	0.245277	-2.02751	5.95081e-08	1.251e-06
NCU01089	646.017	1037.16	254.876	0.245744	-2.02477	2.932e-08	6.42466e-07
NCU07934	193.82	311.046	76.5933	0.246244	-2.02184	3.71916e-09	9.27788e-08
NCU01094	59.972	96.2413	23.7026	0.246283	-2.02161	0.000127936	0.00130608
NCU09360	333.165	534.235	132.095	0.24726	-2.0159	2.5697e-10	7.59897e-09
NCU04726	741.482	1188.24	294.727	0.248037	-2.01137	1.34655e-14	7.04334e-13
NCU00678	249.256	399.228	99.2838	0.24869	-2.00758	4.39211e-10	1.24968e-08
NCU01860	45.3861	72.658	18.1142	0.249308	-2.004	0.000346868	0.00308863
NCU17135	18.9426	30.3168	7.56836	0.249642	-2.00207	0.0294489	0.111874
NCU07434	121.773	194.864	48.681	0.24982	-2.00104	2.36546e-07	4.48607e-06
NCU00233	48.712	77.9457	19.4784	0.249897	-2.00059	0.00060742	0.00495401
NCU04085	246.837	394.595	99.0783	0.251088	-1.99373	5.84708e-06	8.40269e-05
NCU09520	326.529	521.624	131.435	0.251973	-1.98866	5.32167e-11	1.71439e-09
NCU05078	388.933	621.233	156.634	0.252133	-1.98774	1.67406e-11	5.92253e-10
NCU08839	59.7403	95.3821	24.0986	0.252653	-1.98477	0.000138895	0.00139454
NCU01009	60.8596	97.1659	24.5533	0.252695	-1.98453	0.000154281	0.0015254
NCU08393	44.9524	71.7318	18.173	0.253346	-1.98082	0.00123102	0.00901174
NCU08050	15.9088	25.3639	6.45364	0.254442	-1.97459	0.0293504	0.111587
NCU04914	4724.78	7532.54	1917.02	0.254499	-1.97427	5.60451e-11	1.79955e-09
NCU05766	37.7649	60.1729	15.3568	0.255211	-1.97024	0.00148422	0.0104638
NCU04603	8958.55	14265.6	3651.46	0.255962	-1.966	7.861e-11	2.47507e-09
NCU11088	295.197	469.579	120.815	0.257285	-1.95856	1.60235e-10	4.82638e-09
NCU07149	19.6485	31.2446	8.05245	0.257723	-1.95611	0.0299715	0.113549
NCU11201	358.451	569.979	146.923	0.25777	-1.95585	2.26348e-11	7.75402e-10
NCU07359	1530.34	2432.59	628.089	0.258198	-1.95345	4.96026e-07	9.00343e-06
NCU05126	4412.89	7010.12	1815.66	0.259005	-1.94895	7.6774e-10	2.12132e-08
NCU01132	40.6676	64.5998	16.7355	0.259065	-1.94862	0.00106631	0.00800302
NCU09761	1710.66	2717.1	704.215	0.259179	-1.94798	5.675e-06	8.19171e-05
NCU01107	4871.79	7730.77	2012.81	0.260363	-1.9414	1.53905e-16	9.35836e-15
NCU07119	1078.1	1709.85	446.344	0.261043	-1.93764	4.90163e-11	1.5896e-09
NCU03617	744.435	1180.19	308.677	0.261547	-1.93486	8.31805e-10	2.27962e-08
NCU04963	15538.9	24620.5	6457.36	0.262276	-1.93084	2.85791e-05	0.000351069
NCU09755	545.836	864.782	226.89	0.262367	-1.93034	1.69103e-12	6.85499e-11
NCU02540	1288.66	2041.39	535.933	0.262534	-1.92943	8.08946e-15	4.3482e-13
NCU00766	395.59	626.524	164.656	0.262809	-1.92791	1.33973e-11	4.80742e-10
NCU07834	99.5145	157.535	41.4941	0.263396	-1.92469	3.31606e-06	5.00962e-05
NCU07351	12482	19747.8	5216.06	0.264133	-1.92066	1.72281e-14	8.91552e-13
NCU01906	1223.35	1935.37	511.322	0.264199	-1.92031	5.52118e-12	2.10649e-10
NCU16661	75.7098	119.694	31.7257	0.265057	-1.91563	7.57939e-05	0.000821157
NCU04861	26.2421	41.4836	11.0006	0.265179	-1.91496	0.0130845	0.0599337
NCU04728	256.656	405.697	107.615	0.265259	-1.91452	9.7794e-10	2.62828e-08
NCU07273	993.159	1568.93	417.39	0.266035	-1.91031	4.72086e-14	2.29646e-12
NCU07804	1203.12	1900.11	506.129	0.266368	-1.90851	2.45866e-14	1.25237e-12
NCU08895	1907.15	3011.83	802.484	0.266444	-1.90809	4.71041e-15	2.60384e-13
NCU05928	19.4499	30.7153	8.18444	0.266461	-1.908	0.0305129	0.115151
NCU07311	775.355	1223.64	327.069	0.267292	-1.90351	6.14303e-13	2.64449e-11
NCU06413	324.563	512.147	136.979	0.26746	-1.90261	0.00527391	0.0295734
NCU02765	4196.81	6615.65	1777.97	0.268752	-1.89565	6.49668e-16	3.8076e-14
NCU07176	45.6395	71.9327	19.3464	0.268951	-1.89458	0.00139846	0.00995288
NCU02370	422.201	664.888	179.514	0.269992	-1.88901	1.0905e-10	3.38962e-09
NCU16912	16.4994	25.9585	7.04037	0.271216	-1.88249	0.0406119	0.142178
NCU16699	402.342	632.797	171.888	0.271631	-1.88028	7.84264e-11	2.47507e-09
NCU06203	6105.65	9601.39	2609.92	0.271828	-1.87924	1.04115e-15	6.02939e-14
NCU16998	39.4938	62.0906	16.8969	0.272132	-1.87762	0.00220328	0.014464
NCU09042	129.837	203.909	55.7656	0.273482	-1.87048	1.34861e-06	2.21106e-05
NCU04431	100.545	157.733	43.3569	0.274876	-1.86315	2.63001e-05	0.000325125
NCU09692	1075.29	1686.16	464.415	0.275428	-1.86025	4.61874e-13	2.01336e-11
NCU08779	9894.17	15511.4	4276.92	0.275727	-1.85869	2.12689e-15	1.1961e-13
NCU08611	980.876	1537.01	424.739	0.27634	-1.85548	1.68572e-13	7.52309e-12
NCU07578	89.8845	140.827	38.942	0.276523	-1.85453	1.68452e-05	0.0002191
NCU05138	104.184	163.221	45.1464	0.276597	-1.85414	1.3915e-05	0.000185006
NCU07841	52.5135	82.2338	22.7932	0.277175	-1.85113	0.00192696	0.0130371
NCU07168	277.053	433.775	120.331	0.277405	-1.84994	1.6332e-09	4.29443e-08
NCU05534	3193.55	4997.66	1389.45	0.27802	-1.84674	3.11162e-06	4.74498e-05
NCU02164	7602.78	11888.7	3316.84	0.27899	-1.84171	3.75625e-14	1.87408e-12
NCU07102	26.3876	41.2174	11.5579	0.280415	-1.83437	0.0135373	0.0614788
NCU16942	81.9598	128.014	35.906	0.280486	-1.834	0.000110969	0.00115238
NCU01510	1918.71	2996.33	841.09	0.280707	-1.83286	8.25287e-13	3.50621e-11
NCU11264	45.1815	70.5474	19.8157	0.280884	-1.83195	0.0014106	0.0100173
NCU00780	162.297	253.384	71.2105	0.281038	-1.83116	5.67092e-07	1.00496e-05
NCU05038	21.7573	33.9514	9.56315	0.281672	-1.82791	0.0215717	0.0878491
NCU08770	15.6265	24.374	6.879	0.282227	-1.82507	0.049517	0.164253
NCU02764	1069.76	1666.61	472.921	0.283763	-1.81724	2.79704e-13	1.23693e-11
NCU07818	381.446	594.012	168.881	0.284305	-1.81449	3.66932e-08	7.95073e-07
NCU08736	558.06	868.667	247.454	0.284866	-1.81164	1.04683e-11	3.80024e-10
NCU05156	75.208	117.048	33.3684	0.285084	-1.81054	0.000107958	0.00112575
NCU09820	311.572	484.773	138.372	0.285438	-1.80875	1.79771e-09	4.68899e-08
NCU17074	382.576	595.216	169.937	0.285504	-1.80842	4.39296e-10	1.24968e-08
NCU08755	106.839	166.2	47.4785	0.28567	-1.80758	0.00394346	0.0233519
NCU07073	309.212	480.8	137.624	0.28624	-1.8047	1.22943e-09	3.26807e-08
NCU09134	17.9342	27.8746	7.99372	0.286774	-1.80201	0.0343664	0.126265
NCU05801	191.217	296.922	85.511	0.287991	-1.7959	1.88652e-07	3.63445e-06
NCU07101	46.626	72.395	20.8571	0.288101	-1.79535	0.00174384	0.012007
NCU16442	101.197	157.071	45.3223	0.288547	-1.79312	0.000474524	0.00403201
NCU00582	12791.7	19853.7	5729.73	0.288598	-1.79287	2.50492e-11	8.5211e-10
NCU03673	111.352	172.732	49.9719	0.289304	-1.78934	9.71474e-06	0.000134799
NCU05132	8337.34	12931.3	3743.39	0.289483	-1.78845	4.21474e-14	2.07097e-12
NCU01901	1988.22	3083.64	892.792	0.289525	-1.78824	1.56785e-13	7.06185e-12
NCU00332	2422.41	3756.67	1088.15	0.289657	-1.78758	3.77776e-14	1.87519e-12
NCU02975	121.743	188.791	54.6951	0.289713	-1.78731	0.00997737	0.0483656
NCU04674	280.552	435.038	126.067	0.289783	-1.78695	1.39905e-08	3.2331e-07
NCU04390	229.364	355.498	103.229	0.290379	-1.78399	2.49779e-08	5.52295e-07
NCU04887	1941.95	3007.83	876.074	0.291264	-1.7796	1.49693e-05	0.000197875
NCU09061	19.5822	30.32	8.84443	0.291703	-1.77743	0.0354608	0.129068
NCU06890	174.027	269.363	78.6907	0.292136	-1.77529	3.22159e-07	5.98146e-06
NCU08936	178025	275510	80540.5	0.292332	-1.77432	9.08937e-15	4.83227e-13
NCU10865	4147.17	6417.25	1877.09	0.292508	-1.77345	6.31467e-13	2.70641e-11
NCU03222	36793.6	56917	16670.2	0.292886	-1.77159	2.40825e-14	1.23315e-12
NCU02584	24.5569	37.9813	11.1326	0.293107	-1.7705	0.0219332	0.0890975
NCU05627	6609.19	10217.5	3000.9	0.293703	-1.76757	7.96656e-14	3.74428e-12
NCU08064	957.524	1480.2	434.846	0.293774	-1.76722	9.74649e-12	3.57825e-10
NCU09830	720.051	1113.09	327.011	0.293786	-1.76716	4.70303e-11	1.53029e-09
NCU00990	78.9026	121.87	35.9354	0.294867	-1.76186	0.00184291	0.0125734
NCU00865	10634.6	16419.3	4849.85	0.295376	-1.75938	5.37653e-08	1.13467e-06
NCU06125	5741.7	8864.16	2619.25	0.295488	-1.75883	7.66868e-14	3.62178e-12
NCU08738	7127.35	11002.6	3252.12	0.295578	-1.75839	3.12669e-14	1.58435e-12
NCU05198	352.244	543.689	160.799	0.295755	-1.75753	1.97828e-09	5.13246e-08
NCU01979	97.2885	150.076	44.501	0.296523	-1.75378	4.07019e-05	0.000477843
NCU09705	437.092	674.15	200.034	0.296721	-1.75282	9.7043e-10	2.61532e-08
NCU09305	46.7258	72.0666	21.3851	0.296741	-1.75273	0.0021216	0.0140225
NCU16606	68.0712	104.959	31.1829	0.297094	-1.75101	0.000207042	0.00196327
NCU00855	1624.33	2502.91	745.74	0.297949	-1.74686	0.00232626	0.0150941
NCU02516	19.5959	30.1861	9.0058	0.298342	-1.74496	0.0368976	0.132513
NCU00509	143.479	220.882	66.0768	0.29915	-1.74106	2.88857e-06	4.41176e-05
NCU03873	5047.47	7766.43	2328.51	0.299818	-1.73784	1.47539e-13	6.6763e-12
NCU03887	2626.07	4040.1	1212.04	0.300004	-1.73695	2.82593e-10	8.23157e-09
NCU08549	804.06	1236.95	371.174	0.300073	-1.73662	4.29499e-11	1.40694e-09
NCU09631	32.6692	50.2018	15.1367	0.301518	-1.72969	0.00661352	0.0348553
NCU00403	1740.04	2673.85	806.227	0.301523	-1.72966	1.2853e-05	0.000172004
NCU07477	274.716	421.824	127.607	0.302512	-1.72494	2.33168e-06	3.65886e-05
NCU00688	33.2741	51.0594	15.4888	0.303349	-1.72095	0.00884768	0.0438955
NCU02265	2402.32	3682.31	1122.34	0.304792	-1.71411	4.63554e-13	2.01336e-11
NCU02030	42.3408	64.866	19.8157	0.305486	-1.71082	0.00340808	0.0205945
NCU01162	768.1	1176.01	360.188	0.306279	-1.70708	3.13463e-11	1.05525e-09
NCU00995	1412.68	2162.45	662.922	0.306561	-1.70575	1.45627e-12	5.95297e-11
NCU05667	88032.2	134617	41447.5	0.307892	-1.69951	7.41501e-14	3.51906e-12
NCU09126	46.8705	71.6665	22.0744	0.308016	-1.69892	0.001905	0.0129516
NCU03686	25351.8	38740	11963.5	0.308815	-1.69519	6.22283e-14	2.98236e-12
NCU09856	247.39	377.91	116.87	0.309255	-1.69313	0.00267141	0.0169181
NCU00195	284.944	435.169	134.72	0.309582	-1.69161	5.08616e-08	1.08042e-06
NCU10063	2315.3	3535.68	1094.92	0.309678	-1.69116	1.3185e-12	5.4586e-11
NCU11291	4088.04	6235.84	1940.24	0.311143	-1.68435	2.9888e-07	5.61352e-06
NCU07607	623.046	949.942	296.151	0.311756	-1.68151	9.07168e-06	0.000126808
NCU00397	2108.74	3213.05	1004.43	0.312608	-1.67757	3.46763e-12	1.36585e-10
NCU05417	480.073	731.144	229.002	0.31321	-1.6748	4.47641e-10	1.26971e-08
NCU08413	2820.27	4295.12	1345.41	0.313242	-1.67465	0.0233626	0.0938049
NCU04669	2349.19	3567.3	1131.09	0.317073	-1.65711	3.55691e-12	1.38977e-10
NCU05820	328.481	498.7	158.262	0.317348	-1.65586	2.46482e-08	5.46247e-07
NCU06833	20.9309	31.7706	10.0911	0.317625	-1.6546	0.0293444	0.111587
NCU05037	33.6008	50.994	16.2075	0.317832	-1.65366	0.0130121	0.0597506
NCU03370	14610.1	22149.7	7070.39	0.319209	-1.64743	1.42572e-12	5.87746e-11
NCU00826	55.5111	84.1516	26.8706	0.319311	-1.64696	0.000683186	0.00544367
NCU05303	1288.8	1952.54	625.066	0.320129	-1.64327	2.00283e-11	6.95911e-10
NCU04908	429.383	650.372	208.395	0.320424	-1.64195	9.25906e-09	2.19176e-07
NCU08366	167.925	254.108	81.7415	0.32168	-1.6363	2.74575e-06	4.22012e-05
NCU06045	52.5502	79.4617	25.6387	0.322655	-1.63194	0.00231957	0.0150648
NCU04505	1058.8	1600.53	517.07	0.323062	-1.63012	2.13848e-09	5.51863e-08
NCU09043	2159.37	3264.16	1054.57	0.323076	-1.63005	3.47479e-11	1.1538e-09
NCU07776	26052.3	39343.5	12761.2	0.324354	-1.62436	6.87857e-13	2.93516e-11
NCU09777	111.445	168.239	54.6509	0.32484	-1.6222	6.08462e-05	0.000683571
NCU10245	40.7365	61.496	19.977	0.32485	-1.62215	0.00622267	0.0334108
NCU00853	236.633	357.086	116.181	0.325358	-1.6199	4.88197e-07	8.87788e-06
NCU08191	84.104	126.89	41.3182	0.325623	-1.61873	0.000365488	0.00323005
NCU05882	2463.83	3716.78	1210.89	0.325789	-1.61799	3.52835e-11	1.16759e-09
NCU00801	4174.47	6296.04	2052.89	0.32606	-1.61679	6.60573e-07	1.15005e-05
NCU03205	292.548	441.107	143.99	0.326429	-1.61516	1.14744e-07	2.27362e-06
NCU03107	685.386	1033.29	337.483	0.32661	-1.61436	1.28135e-09	3.39679e-08
NCU04988	183.509	276.564	90.4539	0.327063	-1.61236	1.84016e-06	2.9301e-05
NCU06656	4649.33	7005.66	2292.99	0.327306	-1.61129	6.2573e-05	0.000697334
NCU08909	153238	230887	75588	0.327381	-1.61096	3.85405e-12	1.49984e-10
NCU06018	140.223	211.245	69.2009	0.327585	-1.61006	1.65158e-05	0.000215392
NCU10470	34.4737	51.9186	17.0289	0.327992	-1.60827	0.0126196	0.0583571
NCU09535	1528.62	2302.1	755.137	0.328021	-1.60814	2.07671e-11	7.19014e-10
NCU06867	664.1	999.723	328.477	0.328568	-1.60574	1.45035e-09	3.83437e-08
NCU09444	150.413	226.373	74.4517	0.328889	-1.60433	8.97334e-06	0.000125795
NCU04298	355.556	534.648	176.464	0.330057	-1.59921	1.35203e-06	2.21106e-05
NCU05070	222.024	333.837	110.211	0.330134	-1.59888	6.43125e-07	1.13146e-05
NCU05721	3795.89	5705.81	1885.97	0.330534	-1.59713	1.30919e-11	4.71745e-10
NCU01078	115.366	173.323	57.4083	0.331221	-1.59413	4.53799e-05	0.000528111
NCU05068	515.398	773.895	256.9	0.331957	-1.59093	1.38009e-08	3.20451e-07
NCU08334	2382.35	3576.91	1187.8	0.332073	-1.59043	6.92063e-12	2.61987e-10
NCU16751	283.061	424.788	141.335	0.332719	-1.58762	9.94463e-08	1.99487e-06
NCU06032	899.654	1349.34	449.966	0.333471	-1.58437	2.12102e-10	6.32987e-09
NCU00499	6656.76	9982.2	3331.32	0.333726	-1.58326	7.12158e-12	2.67513e-10
NCU09654	41.8209	62.6821	20.9597	0.334382	-1.58043	0.0189652	0.0797029
NCU04605	2104.08	3152.69	1055.47	0.334783	-1.5787	8.74712e-11	2.74518e-09
NCU06420	9372.36	14028.7	4716.04	0.336172	-1.57273	1.54471e-07	3.01778e-06
NCU07850	6372.62	9537.47	3207.76	0.336332	-1.57204	4.71799e-12	1.81428e-10
NCU03775	131.611	196.97	66.2527	0.336359	-1.57192	2.45757e-05	0.00030536
NCU15830	135.068	202.124	68.0129	0.336491	-1.57136	2.9857e-05	0.000363553
NCU08769	50.6415	75.7618	25.5212	0.336862	-1.56977	0.00204199	0.0136165
NCU03675	984.297	1472.4	496.199	0.337001	-1.56918	3.25888e-10	9.43622e-09
NCU04771	1887.56	2823.54	951.578	0.337016	-1.56911	6.97941e-11	2.22632e-09
NCU05855	1117.46	1670.79	564.123	0.337639	-1.56645	2.75707e-10	8.07937e-09
NCU08171	8707.37	13018	4396.73	0.337742	-1.56601	1.83845e-05	0.000236591
NCU04154	225.683	337.268	114.098	0.3383	-1.56362	1.04451e-06	1.76118e-05
NCU06565	1489.66	2225.22	754.111	0.338893	-1.5611	1.33831e-10	4.1204e-09
NCU00987	317.327	473.811	160.843	0.339466	-1.55866	3.1504e-07	5.86046e-06
NCU08850	632.467	943.513	321.422	0.340665	-1.55358	3.20534e-09	8.03371e-08
NCU08516	817.764	1219.22	416.306	0.341452	-1.55025	2.91042e-09	7.35468e-08
NCU07083	228.298	339.844	116.753	0.343548	-1.54142	1.29035e-06	2.13137e-05
NCU04179	2179.8	3243.92	1115.68	0.343928	-1.53982	1.47167e-08	3.38483e-07
NCU00524	28.5411	42.4735	14.6087	0.343949	-1.53973	0.0262269	0.102228
NCU06077	77.303	115.004	39.6019	0.344353	-1.53804	0.000706843	0.00561377
NCU05224	334.597	497.321	171.873	0.345597	-1.53284	1.79739e-07	3.47651e-06
NCU07222	68.5288	101.856	35.2018	0.345605	-1.53281	0.00151454	0.0106466
NCU05113	85.1841	126.557	43.8116	0.346182	-1.5304	0.000489568	0.00413815
NCU04482	541.176	803.743	278.608	0.346639	-1.5285	1.60749e-05	0.000209923
NCU05933	36.0507	53.5032	18.5983	0.347611	-1.52445	0.0161736	0.0708409
NCU04088	1070.62	1588.57	552.667	0.347902	-1.52325	8.05517e-08	1.63951e-06
NCU16500	25.8212	38.3097	13.3326	0.348023	-1.52275	0.0273054	0.105293
NCU04139	97.8286	145.055	50.6025	0.348852	-1.51931	0.0002225	0.00208747
NCU00281	852.858	1264.14	441.577	0.349311	-1.51742	2.95141e-09	7.43893e-08
NCU06682	1577.43	2337.87	816.989	0.34946	-1.5168	2.67679e-06	4.12064e-05
NCU02321	68.2468	101.13	35.3632	0.349679	-1.5159	0.00205746	0.0136916
NCU03184	5209.01	7712.04	2705.99	0.350878	-1.51096	0.000581324	0.00478485
NCU04435	370.372	547.985	192.759	0.35176	-1.50734	3.23858e-07	6.00156e-06
NCU09262	74.1132	109.651	38.5753	0.351801	-1.50717	0.00133538	0.00958107
NCU07949	3716.76	5496.9	1936.61	0.352309	-1.50509	5.10341e-11	1.64954e-09
NCU00877	250.948	370.827	131.068	0.353448	-1.50043	1.49945e-06	2.42732e-05
NCU09909	97.9299	144.597	51.2628	0.354522	-1.49605	0.0103179	0.0496698
NCU08397	1425.59	2104.28	746.895	0.354941	-1.49435	1.7017e-09	4.4505e-08
NCU01213	2859.94	4220.7	1499.18	0.355198	-1.4933	1.58265e-10	4.78186e-09
NCU05861	675.533	996.863	354.204	0.355318	-1.49282	3.72023e-05	0.000440951
NCU03422	48.478	71.5374	25.4186	0.355319	-1.49281	0.00571558	0.0314163
NCU03950	1126.48	1661.85	591.112	0.355696	-1.49129	3.21216e-09	8.03371e-08
NCU08225	757.495	1117.44	397.546	0.355764	-1.49101	1.74203e-08	3.95987e-07
NCU04314	105437	155536	55337.9	0.355788	-1.49091	6.23834e-11	1.99647e-09
NCU07340	380.563	561.253	199.873	0.356119	-1.48957	1.0642e-06	1.78819e-05
NCU04823	617.817	910.898	324.737	0.356502	-1.48802	4.16059e-08	8.93563e-07
NCU06847	3852.34	5678.85	2025.84	0.356735	-1.48708	0.000903362	0.00695317
NCU05414	96.6098	142.412	50.8081	0.356769	-1.48694	0.00061701	0.00501076
NCU12130	787.795	1160.69	414.897	0.357456	-1.48416	5.07524e-09	1.24689e-07
NCU01905	1729.31	2547.75	910.862	0.357516	-1.48392	9.542e-10	2.58591e-08
NCU05128	40.8131	60.1092	21.5171	0.357967	-1.4821	0.0118226	0.0554593
NCU01088	463.871	682.913	244.829	0.358507	-1.47993	0.00455822	0.0261965
NCU11353	1166.48	1717.15	615.811	0.358625	-1.47945	2.68279e-09	6.81485e-08
NCU03284	1487.87	2190.15	785.587	0.358691	-1.47919	1.17865e-09	3.14165e-08
NCU00876	1511.69	2224.93	798.451	0.358866	-1.47848	1.13628e-06	1.89296e-05
NCU10429	149.895	220.615	79.1748	0.358882	-1.47842	0.000191504	0.00183923
NCU09315	1550.99	2282.69	819.293	0.358916	-1.47828	1.67706e-09	4.39788e-08
NCU11279	159.573	234.75	84.396	0.359514	-1.47588	0.000163685	0.0016102
NCU06977	14674.7	21587	7762.45	0.35959	-1.47558	0.000607985	0.00495401
NCU01903	433.847	638.134	229.56	0.359736	-1.47499	2.55355e-06	3.94968e-05
NCU07108	653.345	960.628	346.063	0.360246	-1.47294	1.5942e-08	3.65801e-07
NCU09579	685.032	1006.74	363.326	0.360895	-1.47035	1.44966e-08	3.34213e-07
NCU08749	114.174	167.772	60.5765	0.361064	-1.46967	0.0015513	0.0108502
NCU05519	95.6933	140.564	50.8226	0.361562	-1.46768	0.000556869	0.00462267
NCU07933	784.139	1151.72	416.555	0.36168	-1.46722	2.07809e-08	4.65846e-07
NCU04538	469.421	689.217	249.625	0.362186	-1.4652	2.00634e-07	3.85004e-06
NCU06407	1169.9	1717	622.808	0.362731	-1.46303	2.53771e-09	6.48016e-08
NCU07343	69.0007	101.26	36.7419	0.362849	-1.46256	0.00203883	0.0136048
NCU00854	210.07	308.273	111.868	0.362888	-1.4624	7.96598e-06	0.000112483
NCU09566	323.951	475.324	172.577	0.363072	-1.46167	9.33568e-07	1.58235e-05
NCU16915	181.193	265.801	96.5849	0.363373	-1.46048	1.48442e-05	0.000196488
NCU02201	526.675	772.558	280.793	0.363459	-1.46013	3.0704e-07	5.73358e-06
NCU07129	1400.22	2053.64	746.809	0.363651	-1.45937	0.00202436	0.0135361
NCU05384	2718.53	3986.58	1450.48	0.36384	-1.45862	6.83168e-06	9.7314e-05
NCU07474	631.445	925.613	337.278	0.364383	-1.45647	5.23483e-08	1.10958e-06
NCU07277	80486.3	117979	42993.4	0.364415	-1.45635	2.65188e-10	7.81823e-09
NCU09403	239.815	351.467	128.164	0.364654	-1.4554	2.27538e-06	3.57628e-05
NCU02882	537.598	787.757	287.438	0.364881	-1.4545	1.06136e-07	2.11597e-06
NCU08996	91.7952	134.484	49.1064	0.365146	-1.45345	0.000339556	0.00303634
NCU05595	85.5313	125.3	45.7622	0.36522	-1.45316	0.00106962	0.00801717
NCU06358	148.62	217.713	79.5269	0.365284	-1.45291	9.17861e-05	0.000975942
NCU02343	2127.06	3115.59	1138.53	0.36543	-1.45233	3.71825e-05	0.000440951
NCU06575	67.4544	98.7536	36.1552	0.366115	-1.44963	0.00297153	0.0184257
NCU17257	39.7417	58.1277	21.3557	0.367393	-1.4446	0.0140336	0.0634447
NCU09316	2281.94	3337.36	1226.52	0.367513	-1.44413	8.16992e-09	1.9434e-07
NCU03747	511.905	748.665	275.146	0.367515	-1.44412	1.09171e-07	2.1676e-06
NCU00677	256.182	374.462	137.903	0.36827	-1.44116	4.25211e-06	6.26799e-05
NCU08864	57.132	83.4916	30.7723	0.368568	-1.44	0.00687819	0.0359387
NCU00939	2304.17	3363.63	1244.71	0.370048	-1.43421	9.59424e-10	2.59284e-08
NCU05063	44.7982	65.3952	24.2012	0.370076	-1.4341	0.0133184	0.0607761
NCU04442	8730.35	12741.7	4718.97	0.370356	-1.43302	2.99946e-10	8.71098e-09
NCU03621	1810.18	2641.28	979.08	0.370684	-1.43174	2.18474e-09	5.60827e-08
NCU04983	3840.43	5601.78	2079.08	0.371145	-1.42994	4.59451e-10	1.29942e-08
NCU10246	105.642	154.037	57.2469	0.371643	-1.42801	0.000381129	0.00334657
NCU09718	59.1323	86.2016	32.063	0.371953	-1.42681	0.00477567	0.0272074
NCU11292	6008.3	8757.61	3258.98	0.372131	-1.42612	4.11523e-10	1.18103e-08
NCU07745	4816.29	7016.81	2615.77	0.372787	-1.42358	2.58691e-07	4.87753e-06
NCU00520	4768.72	6941.68	2595.76	0.373939	-1.41913	3.9182e-10	1.12782e-08
NCU00128	33.6253	48.9456	18.305	0.373986	-1.41895	0.0287029	0.109725
NCU05920	40.4817	58.9184	22.0451	0.374163	-1.41826	0.0120152	0.0561843
NCU08270	1520.38	2212.05	828.723	0.374641	-1.41642	4.83094e-08	1.02845e-06
NCU05212	41.502	60.3722	22.6318	0.374871	-1.41553	0.013254	0.0605675
NCU06981	5162.88	7507.89	2817.86	0.375321	-1.4138	7.15366e-09	1.71421e-07
NCU03328	161.844	235.347	88.3417	0.375368	-1.41362	3.1833e-05	0.000385682
NCU06910	34183.8	49674.2	18693.4	0.376321	-1.40997	8.46501e-10	2.31337e-08
NCU04725	45.5733	66.1827	24.9639	0.377196	-1.40661	0.0301726	0.114108
NCU00080	2195.61	3188.47	1202.76	0.37722	-1.40652	2.03529e-09	5.26631e-08
NCU02033	946.7	1374.57	518.83	0.377449	-1.40565	1.26137e-08	2.94997e-07
NCU04672	52.8681	76.7533	28.9828	0.37761	-1.40503	0.00700037	0.0364012
NCU00782	129.606	188.061	71.1517	0.378345	-1.40223	0.000353875	0.00314416
NCU01579	142.348	206.549	78.1479	0.37835	-1.40221	9.27787e-05	0.000984345
NCU03070	393.514	570.713	216.315	0.379026	-1.39963	9.31667e-07	1.58188e-05
NCU09565	156.597	227.024	86.171	0.379568	-1.39757	5.6639e-05	0.000642238
NCU07253	18215.5	26404.2	10026.7	0.379739	-1.39692	9.24278e-10	2.51885e-08
NCU06978	416.464	603.531	229.398	0.380093	-1.39557	2.70563e-07	5.09151e-06
NCU09823	274.449	397.646	151.251	0.380365	-1.39454	0.000287494	0.00262385
NCU00552	20700.8	29986.7	11415	0.380668	-1.39339	5.42648e-07	9.70389e-06
NCU02819	2333.62	3380.09	1287.15	0.380804	-1.39288	4.15071e-09	1.03279e-07
NCU06681	1083.77	1569.51	598.037	0.381034	-1.39201	0.00110608	0.00822712
NCU01233	2155.91	3121.17	1190.64	0.381474	-1.39034	1.77592e-05	0.00022976
NCU02211	3546.49	5133.3	1959.68	0.381759	-1.38927	2.51019e-09	6.42674e-08
NCU00176	561.219	812.265	310.172	0.381861	-1.38888	2.99624e-07	5.61665e-06
NCU10687	2504.15	3624.26	1384.03	0.38188	-1.38881	7.10226e-09	1.70612e-07
NCU08027	3877.64	5611.57	2143.7	0.382015	-1.3883	4.81401e-09	1.18872e-07
NCU04734	58.8809	85.1415	32.6203	0.383131	-1.38409	0.00484873	0.0275384
NCU09713	345.01	498.507	191.512	0.384171	-1.38018	1.30018e-06	2.14397e-05
NCU07205	843.165	1218.26	468.066	0.384208	-1.38004	8.91665e-08	1.79979e-06
NCU05169	66.6399	96.2445	37.0353	0.384804	-1.3778	0.00598319	0.0324292
NCU06650	32.1107	46.3711	17.8502	0.384943	-1.37728	0.0373815	0.133887
NCU07134	215.537	311.182	119.891	0.385278	-1.37603	2.55005e-05	0.000316044
NCU16353	49.2434	71.0735	27.4134	0.385705	-1.37443	0.01007	0.0487175
NCU08696	470.586	679.166	262.005	0.385774	-1.37417	1.35223e-06	2.21106e-05
NCU09495	268.459	387.412	149.505	0.385907	-1.37367	1.59708e-05	0.000209118
NCU08524	42.4858	61.2984	23.6732	0.386197	-1.37259	0.0211441	0.0864963
NCU00270	1020.78	1472.14	569.419	0.386796	-1.37035	7.52741e-08	1.54177e-06
NCU08771	160.493	231.455	89.53	0.386813	-1.37029	0.000130294	0.00132458
NCU07891	103.857	149.748	57.9656	0.387089	-1.36926	0.000910413	0.0070019
NCU11287	334.066	481.666	186.467	0.387129	-1.36911	3.36493e-06	5.07556e-05
NCU02941	169.198	243.937	94.4581	0.387223	-1.36876	6.40617e-05	0.000710669
NCU09663	2804.71	4040.83	1568.59	0.388186	-1.36518	7.17118e-09	1.71421e-07
NCU06655	912.031	1313.87	510.193	0.388314	-1.36471	0.00132373	0.0095256
NCU05079	192.27	276.955	107.585	0.388459	-1.36417	0.00337753	0.020448
NCU10883	1604.49	2310.93	898.045	0.388607	-1.36362	0.00711336	0.0368459
NCU12068	155.295	223.655	86.9336	0.388694	-1.36329	7.08383e-05	0.000773497
NCU05243	886.004	1274.31	497.695	0.390559	-1.35639	8.2017e-08	1.66585e-06
NCU08127	930.308	1337.46	523.158	0.391159	-1.35417	3.14799e-06	4.79293e-05
NCU04167	82.1893	118.103	46.2757	0.391825	-1.35172	0.00193374	0.0130648
NCU06957	435.508	625.719	245.298	0.392025	-1.35098	8.66441e-07	1.48148e-05
NCU07115	73.4385	105.486	41.3915	0.39239	-1.34964	0.00318165	0.0195172
NCU01494	72.2598	103.773	40.746	0.392644	-1.34871	0.003648	0.0217872
NCU02976	407.803	585.444	230.161	0.39314	-1.34689	3.4557e-06	5.20441e-05
NCU03086	140.809	202.062	79.556	0.393721	-1.34475	0.00022788	0.00213383
NCU07008	137.292	196.978	77.6054	0.39398	-1.34381	0.000455553	0.00389804
NCU02637	15971.9	22904.4	9039.33	0.394654	-1.34134	5.91636e-09	1.43901e-07
NCU08190	378.653	542.838	214.468	0.395086	-1.33976	0.000933636	0.00716918
NCU03518	73.0563	104.692	41.4208	0.395646	-1.33772	0.014514	0.0651625
NCU03881	1848.2	2648.01	1048.38	0.395913	-1.33674	2.29641e-08	5.10086e-07
NCU08631	93.6879	134.221	53.1547	0.396024	-1.33634	0.00132241	0.0095256
NCU01882	906.139	1298.04	514.24	0.396167	-1.33582	1.70531e-07	3.31158e-06
NCU00130	397.739	569.731	225.747	0.396234	-1.33558	0.00108616	0.00810997
NCU00033	42.3196	60.5699	24.0692	0.39738	-1.33141	0.0200274	0.0830196
NCU07557	32.7852	46.8988	18.6716	0.398125	-1.32871	0.0362754	0.130809
NCU03903	46.8045	66.9144	26.6947	0.398937	-1.32577	0.0168163	0.0728433
NCU16323	74.8671	107.008	42.7263	0.399281	-1.32452	0.00536611	0.0299695
NCU00559	288.469	412.178	164.759	0.399728	-1.32291	2.19832e-05	0.000277399
NCU09679	93.8514	134.093	53.6094	0.399791	-1.32268	0.00214421	0.0141527
NCU00809	237.354	338.991	135.718	0.400358	-1.32064	5.27293e-05	0.000603534
NCU08092	7574.36	10814.4	4334.3	0.400789	-1.31909	1.08153e-08	2.54775e-07
NCU09159	147.961	211.174	84.7484	0.401321	-1.31717	0.000285779	0.00261065
NCU05377	944.498	1347.62	541.374	0.401726	-1.31572	1.42705e-07	2.79914e-06
NCU00521	3599.55	5132.6	2066.51	0.402624	-1.31249	2.29586e-08	5.10086e-07
NCU10129	374.604	533.921	215.288	0.403221	-1.31036	3.88014e-06	5.77215e-05
NCU03844	327.419	466.273	188.564	0.404408	-1.30612	8.96974e-06	0.000125795
NCU07932	3399.86	4841.5	1958.22	0.404465	-1.30591	2.16943e-08	4.85205e-07
NCU04403	138.329	196.97	79.688	0.404569	-1.30554	0.000270375	0.00248158
NCU09996	210.321	299.358	121.285	0.405149	-1.30347	5.19632e-05	0.000596871
NCU05966	100.894	143.602	58.1857	0.405186	-1.30334	0.00195807	0.0131562
NCU05955	213.27	303.452	123.089	0.405629	-1.30177	4.4018e-05	0.000513491
NCU01140	2739.56	3897.87	1581.25	0.405672	-1.30162	0.000158751	0.00156642
NCU17031	45.7945	65.129	26.46	0.406271	-1.29949	0.0207939	0.0852884
NCU05687	49.6022	70.5442	28.6601	0.406271	-1.29948	0.0126513	0.0584447
NCU07553	337.774	480.207	195.341	0.406785	-1.29766	0.000180171	0.00174938
NCU07345	108.644	154.438	62.8498	0.40696	-1.29704	0.00124862	0.00910635
NCU03562	48.8724	69.422	28.3228	0.407981	-1.29343	0.0193705	0.0808474
NCU07441	151.469	215.14	87.7992	0.408103	-1.29299	0.000343184	0.00306034
NCU05136	28634.1	40654.6	16613.5	0.40865	-1.29106	0.000153638	0.00152059
NCU08727	167.828	238.191	97.4649	0.409189	-1.28916	0.000189031	0.00181923
NCU10457	32.9129	46.6995	19.1263	0.409561	-1.28785	0.043657	0.149714
NCU08851	168.139	238.519	97.7583	0.409856	-1.28681	0.000181149	0.00175538
NCU07523	575.132	815.436	334.828	0.410612	-1.28415	1.98331e-06	3.13751e-05
NCU04053	1794.33	2543.34	1045.32	0.411003	-1.28278	1.04039e-07	2.07842e-06
NCU08892	587.23	832.343	342.118	0.41103	-1.28269	1.47429e-06	2.39856e-05
NCU16848	1428.65	2024.8	832.508	0.411156	-1.28224	9.01976e-08	1.81684e-06
NCU00974	368.198	521.767	214.628	0.411349	-1.28157	1.12485e-05	0.000153272
NCU09253	1503.07	2129.72	876.408	0.411512	-1.28099	1.52841e-07	2.99194e-06
NCU16856	1085.23	1537.67	632.782	0.41152	-1.28097	4.41163e-07	8.05268e-06
NCU05716	2349.26	3328.51	1370.01	0.411599	-1.28069	2.95067e-08	6.45103e-07
NCU00166	258.581	366.336	150.825	0.411712	-1.28029	4.91923e-05	0.000569075
NCU08776	758.889	1075.1	442.678	0.411754	-1.28014	8.89832e-07	1.51614e-05
NCU06114	931.641	1319.47	543.81	0.412142	-1.27879	0.0013389	0.00959906
NCU02356	3233.22	4577.26	1889.19	0.412735	-1.27671	3.52954e-08	7.6993e-07
NCU03707	62.7288	88.7745	36.6832	0.413217	-1.27503	0.00714881	0.0369362
NCU02712	2442.07	3455.96	1428.18	0.413252	-1.27491	1.11707e-05	0.000152492
NCU03803	6391.03	9043.81	3738.25	0.413349	-1.27457	0.00020305	0.00193484
NCU00246	149.661	211.771	87.5497	0.413416	-1.27433	0.000340325	0.00304042
NCU16806	469.344	664.04	274.648	0.413601	-1.27369	4.4317e-06	6.513e-05
NCU08457	1664.57	2354.72	974.413	0.413812	-1.27295	3.8035e-06	5.6668e-05
NCU07442	2379	3364.25	1393.76	0.414285	-1.27131	4.10193e-08	8.82914e-07
NCU00260	3367.96	4760.95	1974.97	0.414827	-1.26942	0.000732328	0.00578313
NCU10007	2008.64	2838.63	1178.66	0.415221	-1.26805	4.83075e-08	1.02845e-06
NCU12022	146.316	206.681	85.9512	0.415863	-1.26582	0.000593167	0.00486587
NCU02691	464.247	655.709	272.785	0.416015	-1.26529	4.13175e-06	6.09981e-05
NCU02320	265.606	375.122	156.091	0.416107	-1.26497	5.98159e-05	0.000673552
NCU00938	2766.34	3903.77	1628.9	0.417265	-1.26096	6.74868e-08	1.40295e-06
NCU00701	2769.72	3905.84	1633.6	0.418246	-1.25758	0.0150893	0.067128
NCU07387	904.034	1274.72	533.351	0.418408	-1.25702	7.12384e-07	1.23324e-05
NCU08435	791.243	1115.53	466.953	0.418592	-1.25638	0.00176104	0.0120911
NCU10907	763.264	1075.9	450.627	0.418837	-1.25554	1.3288e-06	2.18376e-05
NCU08597	1022.52	1441.23	603.814	0.418957	-1.25513	5.15024e-07	9.26186e-06
NCU09010	14532.2	20475.4	8588.9	0.419473	-1.25335	7.31977e-08	1.50241e-06
NCU01833	2592.1	3651.92	1532.27	0.419581	-1.25298	6.9775e-08	1.44128e-06
NCU08288	6721.15	9467.46	3974.84	0.419842	-1.25208	1.67763e-07	3.27087e-06
NCU08537	803.165	1130.99	475.341	0.420287	-1.25055	5.01729e-07	9.08999e-06
NCU07159	332.405	468.002	196.807	0.420526	-1.24973	2.13456e-05	0.000270406
NCU06170	2487.88	3502.71	1473.05	0.420544	-1.24967	6.91383e-08	1.43116e-06
NCU16418	33.6862	47.4248	19.9477	0.420616	-1.24942	0.0395185	0.139505
NCU07974	695.791	979.457	412.125	0.420768	-1.2489	1.2643e-06	2.09547e-05
NCU00349	315.591	444.143	187.039	0.421123	-1.24769	1.95829e-05	0.000250028
NCU09041	9592.26	13498.1	5686.44	0.421278	-1.24716	1.77992e-08	4.03657e-07
NCU00643	918.03	1291.82	544.236	0.421293	-1.24711	0.00060083	0.00490804
NCU10400	912.174	1282.97	541.375	0.421969	-1.24479	1.35542e-06	2.21256e-05
NCU00659	318.369	447.705	189.033	0.422228	-1.24391	2.88228e-05	0.00035317
NCU03863	354.677	498.582	210.771	0.42274	-1.24216	2.20775e-05	0.000278228
NCU03331	123.313	173.318	73.3076	0.422965	-1.24139	0.0180092	0.0767811
NCU03336	1067.51	1500.02	634.997	0.423325	-1.24016	6.47016e-07	1.1342e-05
NCU04928	1418.65	1993.36	843.937	0.423373	-1.24	0.0218638	0.0888524
NCU01180	1153.22	1619.76	686.686	0.423943	-1.23806	0.00064433	0.00519792
NCU09178	79.7906	112.029	47.5518	0.424458	-1.23631	0.00619818	0.0332977
NCU09596	41.8431	58.7223	24.9639	0.425117	-1.23407	0.0260928	0.10191
NCU00368	467.955	656.643	279.267	0.425296	-1.23346	6.17609e-06	8.86241e-05
NCU07816	695.455	975.867	415.043	0.425307	-1.23342	1.04985e-06	1.76712e-05
NCU09611	230.627	323.6	137.654	0.425382	-1.23317	9.63291e-05	0.00101647
NCU04531	1405.44	1971.9	838.977	0.425466	-1.23288	5.33064e-07	9.55097e-06
NCU04492	280.26	393.017	167.502	0.426195	-1.23041	5.09355e-05	0.000585758
NCU01911	5470.48	7667.9	3273.07	0.426854	-1.22819	0.000192506	0.00184703
NCU04042	5175.76	7251.85	3099.66	0.42743	-1.22624	6.46465e-08	1.35281e-06
NCU01636	419.312	587.475	251.15	0.427508	-1.22598	6.49221e-06	9.275e-05
NCU04105	771.816	1081.04	462.596	0.427919	-1.22459	1.94014e-06	3.07922e-05
NCU10002	315.635	441.899	189.371	0.428539	-1.2225	2.68592e-05	0.000331615
NCU02790	464.948	650.892	279.003	0.428648	-1.22213	6.88665e-06	9.79536e-05
NCU05197	90.2848	126.359	54.2107	0.429022	-1.22088	0.00270326	0.0170668
NCU07344	266.287	372.67	159.904	0.429077	-1.22069	3.86646e-05	0.000457625
NCU02596	1247.65	1745.89	749.418	0.429248	-1.22012	1.12861e-06	1.88341e-05
NCU06864	47.0902	65.8575	28.3228	0.430062	-1.21738	0.0359911	0.130218
NCU07811	55.9694	78.1449	33.7938	0.43245	-1.2094	0.0248919	0.0986049
NCU00856	348.56	486.158	210.962	0.433936	-1.20444	3.66707e-05	0.000436149
NCU01465	1718.47	2396.82	1040.13	0.43396	-1.20437	7.17789e-07	1.24039e-05
NCU05704	51.8173	72.2611	31.3736	0.43417	-1.20367	0.0202173	0.0835928
NCU06860	110.937	154.697	67.177	0.434248	-1.20341	0.0115744	0.0544259
NCU03985	209.335	291.694	126.976	0.435305	-1.1999	0.000199164	0.00190153
NCU09410	537.298	748.657	325.939	0.435365	-1.1997	4.98851e-06	7.28727e-05
NCU07032	42.9543	59.8445	26.064	0.435529	-1.19916	0.0407332	0.1425
NCU01472	116.069	161.632	70.5063	0.436216	-1.19689	0.00196591	0.0131996
NCU07736	1193.91	1661.48	726.333	0.43716	-1.19377	0.0399902	0.140711
NCU08733	197.868	275.317	120.419	0.437384	-1.19303	0.000368982	0.0032546
NCU00238	89.8342	124.974	54.6948	0.437651	-1.19215	0.00454415	0.0261598
NCU04350	16416.6	22823.6	10009.7	0.438568	-1.18913	1.93436e-07	3.71924e-06
NCU06918	236.056	328.165	143.946	0.438639	-1.18889	0.000426117	0.00367526
NCU01097	1209.39	1680.31	738.473	0.439486	-1.18611	7.91128e-07	1.36228e-05
NCU07203	70.6537	98.1558	43.1516	0.439624	-1.18566	0.0144312	0.0649102
NCU02850	62.9309	87.3892	38.4727	0.440245	-1.18362	0.0184902	0.0781118
NCU09155	100.372	139.375	61.3685	0.440313	-1.1834	0.00433834	0.0251236
NCU04352	15617	21684.8	9549.27	0.440367	-1.18322	2.21948e-07	4.23399e-06
NCU07178	2764	3837.85	1690.14	0.440387	-1.18315	6.50349e-07	1.13799e-05
NCU07100	1201.29	1666.93	735.658	0.441325	-1.18009	6.59678e-07	1.15005e-05
NCU04921	1758.13	2438.3	1077.97	0.442098	-1.17756	6.73644e-07	1.16825e-05
NCU16941	50.6807	70.2812	31.0802	0.442227	-1.17714	0.0263152	0.102449
NCU03398	250.575	347.376	153.773	0.442671	-1.17569	0.000191318	0.00183923
NCU05846	481.674	667.609	295.739	0.442982	-1.17468	1.55395e-05	0.000204026
NCU08090	533.997	740.074	327.919	0.44309	-1.17433	1.40612e-05	0.000186633
NCU00773	56.8853	78.8033	34.9672	0.443728	-1.17225	0.0285442	0.109247
NCU03967	30981.4	42917.5	19045.2	0.443762	-1.17214	5.66929e-07	1.00496e-05
NCU08121	132.675	183.696	81.6534	0.444503	-1.16973	0.00135349	0.00968955
NCU01098	108.521	150.143	66.8982	0.445563	-1.1663	0.00457754	0.0262619
NCU08372	74.4974	103.042	45.953	0.445964	-1.165	0.00800988	0.0405876
NCU08386	79.0362	109.318	48.7546	0.445989	-1.16492	0.0102604	0.0494667
NCU10009	877.299	1212.69	541.904	0.446859	-1.16211	0.0112015	0.0530951
NCU08298	1332.32	1841.51	823.12	0.44698	-1.16172	1.09994e-06	1.84188e-05
NCU01865	202.627	280.068	125.187	0.446986	-1.1617	0.000486576	0.00412001
NCU04195	945.913	1306.88	584.95	0.447595	-1.15974	1.76851e-06	2.82526e-05
NCU03780	257.223	355.364	159.082	0.44766	-1.15952	0.000196909	0.0018837
NCU08732	52.7388	72.8573	32.6203	0.447729	-1.1593	0.0254385	0.100189
NCU09408	196.166	270.959	121.373	0.447938	-1.15863	0.000555615	0.00461621
NCU01703	1206.55	1665.82	747.289	0.448602	-1.15649	1.67391e-06	2.68736e-05
NCU04297	104.373	143.931	64.8156	0.450325	-1.15096	0.0384769	0.136721
NCU02609	1776.29	2448.76	1103.81	0.450763	-1.14956	1.82892e-06	2.91697e-05
NCU02425	1700.47	2341.93	1059.02	0.452199	-1.14497	1.48507e-06	2.41207e-05
NCU03645	675.486	930.177	420.794	0.452381	-1.14439	0.000561412	0.00465642
NCU08021	861.782	1186.06	537.502	0.453182	-1.14184	5.30799e-06	7.69619e-05
NCU07849	1840.88	2533.48	1148.28	0.453243	-1.14164	1.19496e-06	1.98392e-05
NCU11341	208.617	287.002	130.232	0.453766	-1.13998	0.000302826	0.00273555
NCU02031	525.203	722.37	328.037	0.454111	-1.13888	2.13904e-05	0.00027062
NCU03013	823.902	1132.95	514.856	0.454439	-1.13784	7.7562e-06	0.00010968
NCU02168	102.201	140.497	63.9058	0.454855	-1.13652	0.00398756	0.0234604
NCU07310	325.662	447.579	203.745	0.455217	-1.13538	0.00012747	0.00130268
NCU05864	155.285	213.281	97.2888	0.456153	-1.13241	0.00857982	0.0427848
NCU03741	1449.05	1990.22	907.884	0.456173	-1.13235	4.68798e-06	6.87924e-05
NCU07079	5208.76	7153.58	3263.94	0.456267	-1.13205	5.68634e-07	1.00586e-05
NCU03248	304.81	418.518	191.102	0.456615	-1.13095	0.000126687	0.00129741
NCU07281	20994	28825.6	13162.5	0.456623	-1.13092	1.85313e-07	3.5772e-06
NCU00420	2204.81	3027.03	1382.58	0.456744	-1.13054	1.613e-06	2.60247e-05
NCU10697	54.7272	75.1034	34.3511	0.457384	-1.12852	0.0313046	0.117669
NCU01449	1934.07	2653.61	1214.54	0.457692	-1.12755	3.21402e-06	4.87819e-05
NCU07394	613.794	841.791	385.797	0.458305	-1.12562	1.74485e-05	0.00022604
NCU17136	152.879	209.658	96.1008	0.45837	-1.12541	0.00132335	0.0095256
NCU09682	1306.71	1791.73	821.698	0.458607	-1.12467	4.83863e-06	7.07895e-05
NCU01976	75.377	103.305	47.4491	0.459312	-1.12245	0.0200762	0.0831509
NCU07743	269.875	369.77	169.981	0.459693	-1.12126	0.000319933	0.0028794
NCU04796	2200.22	3013.52	1386.93	0.460238	-1.11955	1.4914e-06	2.41831e-05
NCU06884	260.155	356.298	164.011	0.46032	-1.11929	0.000468744	0.00400036
NCU04830	1034.37	1416.6	652.143	0.460359	-1.11917	9.33479e-06	0.000129926
NCU01660	258.127	353.505	162.749	0.460387	-1.11908	0.0349137	0.127554
NCU02302	83.2886	114.009	52.568	0.461085	-1.1169	0.00949005	0.0464197
NCU02906	444.902	608.893	280.91	0.461346	-1.11608	7.4737e-05	0.000811513
NCU00878	20505.3	28056.6	12954	0.461709	-1.11494	5.11447e-07	9.24883e-06
NCU04615	816.223	1116.77	515.677	0.461758	-1.11479	1.26397e-05	0.00016985
NCU09347	2659.65	3638.89	1680.4	0.461789	-1.1147	8.63917e-07	1.47976e-05
NCU08315	151.052	206.619	95.485	0.46213	-1.11363	0.00247942	0.0159223
NCU00146	738.568	1009.64	467.495	0.46303	-1.11082	2.21479e-05	0.000278754
NCU05189	172.378	235.616	109.14	0.463213	-1.11025	0.00160952	0.011209
NCU04990	944.441	1290.91	597.976	0.463222	-1.11022	1.2852e-05	0.000172004
NCU09263	54672.9	74728.1	34617.8	0.46325	-1.11014	0.00751795	0.0385975
NCU02123	620.357	847.862	392.852	0.463345	-1.10984	2.25345e-05	0.000283253
NCU03257	4694.26	6414.8	2973.72	0.463571	-1.10914	2.61242e-06	4.03433e-05
NCU07994	3439.79	4700.48	2179.09	0.46359	-1.10908	1.92885e-06	3.06631e-05
NCU04692	626.512	855.933	397.091	0.463928	-1.10803	4.23024e-05	0.000495259
NCU02795	82.8232	113.152	52.4947	0.463932	-1.10801	0.0129316	0.05957
NCU05046	301.291	411.319	191.263	0.464998	-1.1047	0.000129988	0.00132286
NCU07230	50.7104	69.2259	32.195	0.465071	-1.10448	0.0396679	0.13988
NCU07965	8707.32	11884	5530.62	0.465383	-1.10351	9.27409e-07	1.57741e-05
NCU05025	69.3735	94.6568	44.0902	0.46579	-1.10225	0.0163274	0.071265
NCU05151	367.921	501.954	233.887	0.465954	-1.10174	0.0149853	0.0667853
NCU01908	1985.56	2708.14	1262.98	0.466366	-1.10047	3.60193e-06	5.39956e-05
NCU09175	56469.4	77002.7	35936.2	0.466688	-1.09947	1.65895e-06	2.66776e-05
NCU09182	6091.03	8304.78	3877.28	0.466874	-1.0989	0.00239816	0.0154735
NCU08748	241.374	328.945	153.803	0.467564	-1.09677	0.000545929	0.00455128
NCU02594	94.4	128.605	60.1951	0.468062	-1.09523	0.00743211	0.0382375
NCU07761	529.828	721.704	337.952	0.468269	-1.09459	3.02555e-05	0.000367486
NCU01135	153.552	208.994	98.1104	0.46944	-1.09099	0.00232719	0.0150941
NCU01181	4679.17	6368.41	2989.94	0.469495	-1.09082	2.09145e-06	3.29785e-05
NCU02122	3378.13	4597.3	2158.95	0.469613	-1.09045	2.40551e-06	3.75964e-05
NCU00129	394.597	536.957	252.236	0.469751	-1.09003	0.00265735	0.0168536
NCU09227	1429.16	1943.32	914.998	0.470842	-1.08669	1.14691e-05	0.000155842
NCU01572	122.648	166.722	78.5733	0.471284	-1.08533	0.00410485	0.0240078
NCU03505	3541.58	4813.62	2269.55	0.471485	-1.08472	3.19637e-06	4.85898e-05
NCU02853	977.304	1328.03	626.577	0.47181	-1.08372	1.87915e-05	0.000241509
NCU00127	4147.01	5634.81	2659.2	0.471925	-1.08337	3.90626e-06	5.80214e-05
NCU04632	184.215	250.283	118.146	0.472049	-1.08299	0.00194923	0.013133
NCU01297	1539.29	2089.76	988.819	0.473173	-1.07956	1.2289e-05	0.000165596
NCU03333	9140.42	12406	5874.81	0.473546	-1.07842	1.27652e-05	0.0001713
NCU05732	67.3113	91.3538	43.2688	0.47364	-1.07814	0.0210661	0.0862592
NCU08226	60.6915	82.3678	39.0152	0.473671	-1.07804	0.0204159	0.0841698
NCU02412	155.994	211.706	100.281	0.473681	-1.07801	0.00248141	0.0159246
NCU00451	7374.94	10007.8	4742.08	0.473838	-1.07753	2.0074e-06	3.17046e-05
NCU02058	82.2508	111.567	52.9346	0.474464	-1.07563	0.012368	0.0573604
NCU05013	51.9619	70.4821	33.4417	0.474471	-1.07561	0.0438203	0.150153
NCU06267	283.385	384.366	182.404	0.474558	-1.07534	0.000255505	0.00235845
NCU07935	739.837	1003.22	476.456	0.474928	-1.07422	1.73565e-05	0.000225149
NCU05840	435.033	589.727	280.338	0.475369	-1.07288	9.8807e-05	0.00103927
NCU05718	360.802	488.92	232.684	0.475914	-1.07123	0.00625123	0.0335087
NCU04824	339.504	459.745	219.263	0.476923	-1.06817	0.000288245	0.00262579
NCU03754	1155.76	1565.01	746.512	0.477002	-1.06793	9.72646e-06	0.000134799
NCU05163	260.107	352.2	168.015	0.477044	-1.06781	0.000291328	0.0026415
NCU06486	48.3014	65.3905	31.2122	0.477321	-1.06697	0.0460479	0.155501
NCU04558	724.781	981.174	468.389	0.477376	-1.0668	2.43637e-05	0.000303113
NCU01066	55.9258	75.6964	36.1552	0.477634	-1.06602	0.034044	0.125507
NCU12104	206.931	280.066	133.796	0.477731	-1.06573	0.00125749	0.00913675
NCU05652	449.812	608.359	291.266	0.478772	-1.06259	0.000130702	0.00132735
NCU01917	46.9888	63.5429	30.4348	0.478965	-1.06201	0.0381666	0.136065
NCU06566	624.672	844.509	404.835	0.479374	-1.06078	6.88515e-05	0.000754343
NCU05291	9328.89	12601.2	6056.6	0.480637	-1.05698	2.4075e-06	3.75964e-05
NCU08664	137.312	185.476	89.1485	0.480646	-1.05695	0.00318082	0.0195172
NCU08795	222.585	300.549	144.62	0.481187	-1.05533	0.000694667	0.0055261
NCU05012	362.417	489.319	235.515	0.481312	-1.05496	0.000816891	0.00635802
NCU08434	11045.6	14908.6	7182.62	0.481778	-1.05356	3.54656e-06	5.32477e-05
NCU04690	87.2426	117.708	56.7777	0.482362	-1.05181	0.0168594	0.0729975
NCU06027	331.287	446.786	215.787	0.482976	-1.04998	0.000416764	0.00362096
NCU05817	63.0406	85.0124	41.0688	0.483091	-1.04963	0.0322375	0.120491
NCU03693	669.253	902.106	436.399	0.483756	-1.04765	5.76454e-05	0.000651546
NCU02318	759.042	1023.1	494.981	0.483803	-1.04751	2.46651e-05	0.00030608
NCU02793	9316.01	12553.2	6078.83	0.484246	-1.04619	5.00957e-06	7.30707e-05
NCU06254	295.901	398.573	193.228	0.484801	-1.04453	0.000476206	0.00404276
NCU05159	86.3119	116.257	56.3668	0.484847	-1.0444	0.0154441	0.0682669
NCU09681	676.084	910.019	442.149	0.485867	-1.04137	3.46247e-05	0.000415908
NCU08949	8737.96	11754.3	5721.65	0.486772	-1.03868	0.000953834	0.00728975
NCU11046	490.687	659.556	321.818	0.487931	-1.03525	0.000176089	0.00171489
NCU08619	144.655	194.397	94.9128	0.488242	-1.03433	0.00388838	0.0230812
NCU07234	199.979	268.64	131.318	0.488825	-1.03261	0.0204333	0.0841996
NCU03654	1394.06	1872.13	915.996	0.489281	-1.03126	0.00842977	0.0422313
NCU05965	210.462	282.582	138.343	0.489568	-1.03042	0.00144932	0.0102474
NCU03878	1112.56	1493.08	732.052	0.490298	-1.02827	0.00336533	0.0204123
NCU08232	745.869	1000.39	491.344	0.491151	-1.02576	0.000102197	0.00107026
NCU02799	855.628	1147.6	563.653	0.491157	-1.02574	2.76859e-05	0.000341389
NCU06227	337.452	452.603	222.3	0.491158	-1.02574	0.000631749	0.00510913
NCU01136	592.503	794.368	390.638	0.491759	-1.02398	0.000139414	0.00139831
NCU01704	932.603	1250.14	615.064	0.491995	-1.02328	5.59788e-05	0.000635493
NCU10500	5891.13	7896.49	3885.77	0.492089	-1.02301	0.00103473	0.00782197
NCU00749	445.85	597.325	294.375	0.492822	-1.02086	0.000126192	0.0012937
NCU02883	3927.67	5260.96	2594.38	0.493138	-1.01994	0.00713673	0.0369067
NCU00471	282.011	377.423	186.599	0.494402	-1.01624	0.00292265	0.0181574
NCU08509	111.068	148.624	73.5132	0.494626	-1.01559	0.0130782	0.0599337
NCU05860	66.3452	88.7761	43.9143	0.494663	-1.01548	0.0342876	0.126071
NCU09637	3485.79	4663.58	2308	0.494899	-1.01479	0.0285872	0.109328
NCU03647	486.111	650.229	321.994	0.495201	-1.01391	0.000214664	0.00202691
NCU01575	1466.83	1961.74	971.921	0.495437	-1.01323	1.8901e-05	0.000242596
NCU01559	973.978	1302.47	645.485	0.495584	-1.0128	0.000421587	0.00364913
NCU04130	652.98	873.038	432.923	0.495882	-1.01193	0.000101588	0.00106618
NCU08775	63.7481	85.21	42.2861	0.496257	-1.01084	0.032858	0.121967
NCU05005	541.215	723.298	359.132	0.49652	-1.01008	0.000181665	0.00175863
NCU01970	437.084	584.119	290.048	0.496557	-1.00997	0.000325173	0.00292115
NCU06177	474.749	634.383	315.115	0.496726	-1.00948	0.000221788	0.0020828
NCU16890	81.778	109.257	54.2988	0.496981	-1.00874	0.0269517	0.104131
NCU07065	153.874	205.561	102.188	0.497117	-1.00834	0.00391015	0.0231855
NCU17176	78.2253	104.499	51.9519	0.497153	-1.00824	0.0206887	0.0849905
NCU04212	730.35	975.297	485.403	0.497698	-1.00666	0.000110986	0.00115238
NCU00285	1093.14	1458.49	727.783	0.498996	-1.0029	7.44103e-05	0.000808869
NCU11282	753.42	1005.21	501.625	0.499023	-1.00282	6.57309e-05	0.0007267
NCU05255	954.537	1273.52	635.554	0.499053	-1.00274	6.32688e-05	0.000704281
NCU01060	1021.43	1362.67	680.187	0.499157	-1.00243	7.14612e-05	0.000779424
NCU16902	79.7709	106.417	53.1253	0.499221	-1.00225	0.026013	0.101639
NCU06836	8270.26	11032	5508.52	0.499322	-1.00196	1.02196e-05	0.000141231
NCU07425	2023.16	2697.95	1348.36	0.499772	-1.00066	2.06452e-05	0.000262216

## Sheet: MACS-H3K9me3-WT-peaks
Supercontig_12.1	230	231
Supercontig_12.1	21684	22324
Supercontig_12.1	31950	33415
Supercontig_12.1	63239	64847
Supercontig_12.1	69908	69909
Supercontig_12.1	74187	74188
Supercontig_12.1	76915	76916
Supercontig_12.1	85363	88811
Supercontig_12.1	134851	134852
Supercontig_12.1	199806	205194
Supercontig_12.1	267439	267709
Supercontig_12.1	269767	269768
Supercontig_12.1	287678	288147
Supercontig_12.1	385214	385215
Supercontig_12.1	558871	558872
Supercontig_12.1	670645	672723
Supercontig_12.1	688783	690248
Supercontig_12.1	694073	696143
Supercontig_12.1	872807	875170
Supercontig_12.1	901155	901156
Supercontig_12.1	911739	912683
Supercontig_12.1	917387	917388
Supercontig_12.1	922154	922435
Supercontig_12.1	924655	924656
Supercontig_12.1	1182218	1185851
Supercontig_12.1	1219447	1221586
Supercontig_12.1	1226225	1229063
Supercontig_12.1	1337678	1340171
Supercontig_12.1	1345842	1345843
Supercontig_12.1	1348415	1349151
Supercontig_12.1	1550812	1550813
Supercontig_12.1	1947086	1947087
Supercontig_12.1	2273544	2277010
Supercontig_12.1	2280860	2281882
Supercontig_12.1	2287480	2287481
Supercontig_12.1	2331356	2331357
Supercontig_12.1	2340512	2342487
Supercontig_12.1	2381870	2383366
Supercontig_12.1	2403444	2403445
Supercontig_12.1	3062514	3065335
Supercontig_12.1	3357577	3357578
Supercontig_12.1	3477164	3477165
Supercontig_12.1	3479458	3479459
Supercontig_12.1	3489579	3489580
Supercontig_12.1	3493870	3494387
Supercontig_12.1	3553398	3556215
Supercontig_12.1	3562493	3565344
Supercontig_12.1	3579852	3579853
Supercontig_12.1	3586332	3586333
Supercontig_12.1	3595877	3598078
Supercontig_12.1	3618477	3618478
Supercontig_12.1	3625123	3625124
Supercontig_12.1	3634759	3637518
Supercontig_12.1	3642100	3643199
Supercontig_12.1	3656843	3656844
Supercontig_12.1	3660531	3660532
Supercontig_12.1	3663835	3663836
Supercontig_12.1	3680561	3683987
Supercontig_12.1	3694661	3697222
Supercontig_12.1	3700777	3702348
Supercontig_12.1	3705996	3708384
Supercontig_12.1	3715149	3716764
Supercontig_12.1	3718872	3718873
Supercontig_12.1	3728552	3729403
Supercontig_12.1	3735433	3736622
Supercontig_12.1	3770402	3770403
Supercontig_12.1	3781899	3781900
Supercontig_12.1	3864497	3864498
Supercontig_12.1	3887027	3887028
Supercontig_12.1	3906085	3907493
Supercontig_12.1	3943354	3944791
Supercontig_12.1	3972260	3972261
Supercontig_12.1	3975218	3976050
Supercontig_12.1	3983174	3986583
Supercontig_12.1	4006083	4006084
Supercontig_12.1	4010354	4013004
Supercontig_12.1	4015488	4015489
Supercontig_12.1	4027054	4027055
Supercontig_12.1	4033401	4033402
Supercontig_12.1	4038279	4038280
Supercontig_12.1	4043500	4046962
Supercontig_12.1	4064105	4064106
Supercontig_12.1	4092717	4094243
Supercontig_12.1	4098072	4098686
Supercontig_12.1	4162927	4166485
Supercontig_12.1	4170053	4170054
Supercontig_12.1	4172518	4172519
Supercontig_12.1	4194754	4194755
Supercontig_12.1	4213837	4213838
Supercontig_12.1	4314779	4316240
Supercontig_12.1	4323642	4327285
Supercontig_12.1	4352630	4355158
Supercontig_12.1	4376764	4376765
Supercontig_12.1	4531843	4535445
Supercontig_12.1	4542033	4543689
Supercontig_12.1	4879074	4882049
Supercontig_12.1	4923901	4923902
Supercontig_12.1	5006724	5010035
Supercontig_12.1	5078249	5082051
Supercontig_12.1	5263508	5263509
Supercontig_12.1	5317653	5318694
Supercontig_12.1	5324115	5324116
Supercontig_12.1	5339224	5339615
Supercontig_12.1	5395118	5395855
Supercontig_12.1	5398672	5399570
Supercontig_12.1	5401907	5401908
Supercontig_12.1	5482456	5484188
Supercontig_12.1	5487549	5488237
Supercontig_12.1	5492107	5492108
Supercontig_12.1	5498089	5499153
Supercontig_12.1	5530121	5533061
Supercontig_12.1	5542310	5544677
Supercontig_12.1	5735051	5737344
Supercontig_12.1	5764822	5764823
Supercontig_12.1	5770316	5772842
Supercontig_12.1	5805686	5808463
Supercontig_12.1	5920202	5922791
Supercontig_12.1	5926218	5926219
Supercontig_12.1	5941530	5944269
Supercontig_12.1	5955532	5955533
Supercontig_12.1	5957634	5957635
Supercontig_12.1	5973079	5976494
Supercontig_12.1	6197639	6199931
Supercontig_12.1	6249909	6250848
Supercontig_12.1	6262530	6262531
Supercontig_12.1	6298354	6300887
Supercontig_12.1	6329529	6329530
Supercontig_12.1	6332904	6332905
Supercontig_12.1	6384382	6384383
Supercontig_12.1	6392459	6392460
Supercontig_12.1	6453942	6453943
Supercontig_12.1	6457901	6457902
Supercontig_12.1	6470175	6474138
Supercontig_12.1	6501877	6501878
Supercontig_12.1	6504913	6504914
Supercontig_12.1	6521737	6522578
Supercontig_12.1	6525356	6528734
Supercontig_12.1	6600552	6600553
Supercontig_12.1	6998480	7002549
Supercontig_12.1	7373610	7373611
Supercontig_12.1	7424142	7424143
Supercontig_12.1	7426794	7426795
Supercontig_12.1	7507045	7510603
Supercontig_12.1	7711880	7711881
Supercontig_12.1	8227320	8229781
Supercontig_12.1	8265059	8266681
Supercontig_12.1	8279330	8281168
Supercontig_12.1	8290707	8292956
Supercontig_12.1	8893933	8895097
Supercontig_12.1	8944382	8944383
Supercontig_12.1	8992631	8994361
Supercontig_12.1	8997642	8999944
Supercontig_12.1	9163924	9165488
Supercontig_12.1	9172773	9172774
Supercontig_12.1	9174796	9174797
Supercontig_12.1	9286990	9288511
Supercontig_12.1	9290619	9290620
Supercontig_12.1	9319448	9319449
Supercontig_12.1	9334646	9337076
Supercontig_12.1	9359742	9359743
Supercontig_12.1	9407366	9407367
Supercontig_12.1	9481812	9484818
Supercontig_12.1	9491605	9491606
Supercontig_12.1	9496956	9496957
Supercontig_12.1	9508280	9511651
Supercontig_12.1	9514056	9514991
Supercontig_12.1	9698335	9700121
Supercontig_12.1	9706038	9708352
Supercontig_12.1	9721821	9721822
Supercontig_12.1	9729916	9729917
Supercontig_12.1	9741354	9741355
Supercontig_12.1	9755670	9758032
Supercontig_12.1	9772951	9774992
Supercontig_12.1	9796968	9798649
Supercontig_12.10	462	2418
Supercontig_12.10	4442	4443
Supercontig_12.10	6821	6822
Supercontig_12.10	67610	67611
Supercontig_12.10	76706	77870
Supercontig_12.10	87798	87799
Supercontig_12.10	116689	116690
Supercontig_12.10	119510	119511
Supercontig_12.10	123296	125252
Supercontig_12.11	110	2313
Supercontig_12.11	6242	6243
Supercontig_12.11	18086	18087
Supercontig_12.11	28794	31388
Supercontig_12.12	401	2784
Supercontig_12.12	6752	6753
Supercontig_12.12	12873	12874
Supercontig_12.12	16544	19517
Supercontig_12.13	110	2471
Supercontig_12.13	9959	12375
Supercontig_12.14	1221	4055
Supercontig_12.14	6293	10923
Supercontig_12.15	348	3293
Supercontig_12.15	5364	6497
Supercontig_12.15	8838	8839
Supercontig_12.16	112	2586
Supercontig_12.16	6333	8881
Supercontig_12.17	247	6590
Supercontig_12.18	227	5867
Supercontig_12.19	293	4352
Supercontig_12.2	565	3180
Supercontig_12.2	5890	8740
Supercontig_12.2	13661	13662
Supercontig_12.2	109291	111568
Supercontig_12.2	124679	124680
Supercontig_12.2	140091	141917
Supercontig_12.2	144403	146843
Supercontig_12.2	391093	393787
Supercontig_12.2	397669	400546
Supercontig_12.2	517063	517064
Supercontig_12.2	572786	576989
Supercontig_12.2	684976	687922
Supercontig_12.2	700709	700710
Supercontig_12.2	704129	707403
Supercontig_12.2	874688	874689
Supercontig_12.2	880294	880295
Supercontig_12.2	882730	882731
Supercontig_12.2	1016443	1016444
Supercontig_12.2	1018724	1020035
Supercontig_12.2	1067133	1068266
Supercontig_12.2	1074154	1076713
Supercontig_12.2	1094443	1095197
Supercontig_12.2	1136308	1136309
Supercontig_12.2	1147864	1151106
Supercontig_12.2	1155550	1155551
Supercontig_12.2	1171280	1171281
Supercontig_12.2	1217630	1217631
Supercontig_12.2	1219709	1219710
Supercontig_12.2	1303970	1303971
Supercontig_12.2	1363227	1365372
Supercontig_12.2	1437414	1442032
Supercontig_12.2	1721041	1723647
Supercontig_12.2	1730425	1730882
Supercontig_12.2	1733244	1733833
Supercontig_12.2	1989528	1992329
Supercontig_12.2	1995036	1996030
Supercontig_12.2	2000956	2001725
Supercontig_12.2	2113523	2115540
Supercontig_12.2	2123587	2123588
Supercontig_12.2	2151855	2151856
Supercontig_12.2	2160549	2160550
Supercontig_12.2	2170014	2170427
Supercontig_12.2	2231840	2231841
Supercontig_12.2	2454506	2454507
Supercontig_12.2	2791186	2791187
Supercontig_12.2	2795615	2795616
Supercontig_12.2	2849064	2853089
Supercontig_12.2	2903317	2905612
Supercontig_12.2	2919079	2921113
Supercontig_12.2	3247824	3247825
Supercontig_12.2	3303897	3305865
Supercontig_12.2	3313101	3314518
Supercontig_12.2	3317926	3320968
Supercontig_12.2	3366895	3369656
Supercontig_12.2	3385264	3387241
Supercontig_12.2	3493524	3502606
Supercontig_12.2	3602283	3603786
Supercontig_12.2	3607193	3607666
Supercontig_12.2	3629053	3629054
Supercontig_12.2	3631222	3631223
Supercontig_12.2	3635514	3635515
Supercontig_12.2	3640757	3640758
Supercontig_12.2	3644061	3644062
Supercontig_12.2	3646496	3646497
Supercontig_12.2	3649800	3650089
Supercontig_12.2	3670190	3670191
Supercontig_12.2	3683024	3683025
Supercontig_12.2	3688781	3690625
Supercontig_12.2	3693450	3694852
Supercontig_12.2	3698285	3699168
Supercontig_12.2	3704049	3704050
Supercontig_12.2	3709881	3712100
Supercontig_12.2	3889159	3890687
Supercontig_12.2	3903375	3903376
Supercontig_12.2	3906989	3908895
Supercontig_12.2	3915830	3915831
Supercontig_12.2	3925915	3925916
Supercontig_12.2	3927958	3929494
Supercontig_12.2	3934424	3936367
Supercontig_12.2	4011581	4011582
Supercontig_12.2	4098787	4100201
Supercontig_12.2	4113072	4113073
Supercontig_12.2	4116072	4116073
Supercontig_12.2	4120313	4121014
Supercontig_12.2	4139057	4141943
Supercontig_12.2	4144907	4145606
Supercontig_12.2	4153227	4153228
Supercontig_12.2	4155744	4158743
Supercontig_12.2	4208996	4208997
Supercontig_12.2	4243437	4243438
Supercontig_12.2	4255050	4255051
Supercontig_12.2	4260416	4262218
Supercontig_12.2	4345370	4347919
Supercontig_12.2	4355129	4355907
Supercontig_12.2	4358665	4359556
Supercontig_12.2	4471111	4471471
Supercontig_12.2	4473908	4473909
Supercontig_12.2	4476674	4478295
Supercontig_12.20	372	373
Supercontig_12.3	224	1791
Supercontig_12.3	8686	8687
Supercontig_12.3	62825	63364
Supercontig_12.3	68065	68539
Supercontig_12.3	77016	77727
Supercontig_12.3	133551	135018
Supercontig_12.3	145906	147688
Supercontig_12.3	181359	183311
Supercontig_12.3	188637	188638
Supercontig_12.3	267703	267704
Supercontig_12.3	302522	303757
Supercontig_12.3	309230	309231
Supercontig_12.3	326346	327314
Supercontig_12.3	347197	348646
Supercontig_12.3	354543	355680
Supercontig_12.3	365543	365544
Supercontig_12.3	367627	368060
Supercontig_12.3	378270	380233
Supercontig_12.3	431320	434394
Supercontig_12.3	437323	437324
Supercontig_12.3	447189	448127
Supercontig_12.3	475044	475758
Supercontig_12.3	483220	483221
Supercontig_12.3	485412	486114
Supercontig_12.3	564142	567979
Supercontig_12.3	672913	672914
Supercontig_12.3	684477	685308
Supercontig_12.3	747042	747043
Supercontig_12.3	749297	749298
Supercontig_12.3	782105	782502
Supercontig_12.3	801043	801044
Supercontig_12.3	869958	869959
Supercontig_12.3	905420	905421
Supercontig_12.3	943129	944779
Supercontig_12.3	962771	965308
Supercontig_12.3	1042435	1044268
Supercontig_12.3	1055649	1059058
Supercontig_12.3	1252667	1255766
Supercontig_12.3	1258965	1259981
Supercontig_12.3	1271244	1274249
Supercontig_12.3	1340597	1345791
Supercontig_12.3	1387113	1387114
Supercontig_12.3	1389557	1389558
Supercontig_12.3	1702682	1704227
Supercontig_12.3	1721566	1721567
Supercontig_12.3	1729744	1732006
Supercontig_12.3	1737220	1737221
Supercontig_12.3	1743286	1743287
Supercontig_12.3	1749418	1749419
Supercontig_12.3	1815031	1816606
Supercontig_12.3	2185541	2188017
Supercontig_12.3	2218084	2218085
Supercontig_12.3	2232485	2236654
Supercontig_12.3	2288824	2290633
Supercontig_12.3	2293878	2295967
Supercontig_12.3	2416270	2416271
Supercontig_12.3	2424288	2425662
Supercontig_12.3	2436187	2436188
Supercontig_12.3	2444194	2444195
Supercontig_12.3	2761455	2762724
Supercontig_12.3	2821694	2823834
Supercontig_12.3	2831886	2832901
Supercontig_12.3	2881338	2882157
Supercontig_12.3	2888418	2890585
Supercontig_12.3	2966024	2969684
Supercontig_12.3	2972060	2973594
Supercontig_12.3	3519048	3519049
Supercontig_12.3	3521399	3521400
Supercontig_12.3	3555870	3560015
Supercontig_12.3	3578242	3578243
Supercontig_12.3	4073392	4074849
Supercontig_12.3	4093004	4095489
Supercontig_12.3	4255708	4257742
Supercontig_12.3	4280250	4281619
Supercontig_12.3	4335031	4335032
Supercontig_12.3	4528154	4532299
Supercontig_12.3	4579025	4580319
Supercontig_12.3	4582730	4582731
Supercontig_12.3	4588348	4591788
Supercontig_12.3	4594148	4596141
Supercontig_12.3	4829034	4830520
Supercontig_12.3	4842736	4842737
Supercontig_12.3	4854380	4854381
Supercontig_12.3	4856492	4856493
Supercontig_12.3	5045970	5049679
Supercontig_12.3	5062734	5065618
Supercontig_12.3	5084876	5088044
Supercontig_12.3	5208016	5214009
Supercontig_12.3	5273271	5274596
Supercontig_12.4	764	765
Supercontig_12.4	36842	38044
Supercontig_12.4	40930	40931
Supercontig_12.4	43328	46784
Supercontig_12.4	114484	118088
Supercontig_12.4	127416	128341
Supercontig_12.4	139371	141129
Supercontig_12.4	364434	364435
Supercontig_12.4	368041	368042
Supercontig_12.4	371249	373341
Supercontig_12.4	440431	440432
Supercontig_12.4	443159	445928
Supercontig_12.4	453142	455180
Supercontig_12.4	876082	876506
Supercontig_12.4	883156	883157
Supercontig_12.4	903317	903318
Supercontig_12.4	934097	934098
Supercontig_12.4	944971	944972
Supercontig_12.4	968230	968231
Supercontig_12.4	1009175	1009176
Supercontig_12.4	1044071	1044072
Supercontig_12.4	1072875	1072876
Supercontig_12.4	1087740	1087741
Supercontig_12.4	1107982	1111648
Supercontig_12.4	1125659	1128953
Supercontig_12.4	1137521	1137522
Supercontig_12.4	1159691	1159692
Supercontig_12.4	1164245	1165275
Supercontig_12.4	1171755	1173134
Supercontig_12.4	1273355	1273356
Supercontig_12.4	1419939	1419940
Supercontig_12.4	1443817	1446336
Supercontig_12.4	1452194	1452195
Supercontig_12.4	1484103	1484104
Supercontig_12.4	1697668	1697669
Supercontig_12.4	1761485	1761486
Supercontig_12.4	1881063	1883097
Supercontig_12.4	1909411	1909412
Supercontig_12.4	1925123	1925124
Supercontig_12.4	1931706	1932207
Supercontig_12.4	2018788	2022156
Supercontig_12.4	2028756	2028757
Supercontig_12.4	2049853	2050939
Supercontig_12.4	2337044	2337045
Supercontig_12.4	2345817	2345818
Supercontig_12.4	2376059	2379121
Supercontig_12.4	2388748	2392949
Supercontig_12.4	2547031	2547032
Supercontig_12.4	2608838	2611478
Supercontig_12.4	2613865	2613866
Supercontig_12.4	2620018	2622378
Supercontig_12.4	2660917	2664760
Supercontig_12.4	2710977	2713486
Supercontig_12.4	2718569	2720038
Supercontig_12.4	2735361	2737589
Supercontig_12.4	2998269	2998270
Supercontig_12.4	3053023	3053857
Supercontig_12.4	3059593	3059594
Supercontig_12.4	3081406	3083004
Supercontig_12.4	3743509	3745060
Supercontig_12.4	3750321	3751972
Supercontig_12.4	3757847	3757848
Supercontig_12.4	3769552	3769553
Supercontig_12.4	4031666	4035241
Supercontig_12.4	4041013	4041014
Supercontig_12.4	4047071	4047072
Supercontig_12.4	4062176	4063582
Supercontig_12.4	4168360	4169997
Supercontig_12.4	4179571	4179572
Supercontig_12.4	4230758	4235677
Supercontig_12.4	4238928	4240572
Supercontig_12.4	4250494	4251715
Supercontig_12.4	4282912	4282913
Supercontig_12.4	4295472	4295473
Supercontig_12.4	4298678	4301439
Supercontig_12.4	4387515	4389235
Supercontig_12.4	4448936	4450579
Supercontig_12.4	4452794	4452795
Supercontig_12.4	4456098	4456099
Supercontig_12.4	4458327	4458328
Supercontig_12.4	4481958	4483895
Supercontig_12.4	4625542	4626905
Supercontig_12.4	4633444	4633445
Supercontig_12.4	4658472	4660066
Supercontig_12.4	4769244	4772145
Supercontig_12.4	5018444	5018445
Supercontig_12.4	5024105	5024337
Supercontig_12.4	5036483	5038207
Supercontig_12.4	5209835	5210828
Supercontig_12.4	5227774	5229747
Supercontig_12.4	5241631	5241632
Supercontig_12.4	5246948	5248941
Supercontig_12.4	5308704	5309523
Supercontig_12.4	5330228	5331536
Supercontig_12.4	5814609	5815151
Supercontig_12.4	5848533	5848534
Supercontig_12.4	5853505	5856112
Supercontig_12.4	5862833	5864991
Supercontig_12.4	5872162	5875850
Supercontig_12.4	5878081	5878528
Supercontig_12.4	5888729	5888730
Supercontig_12.4	5914566	5916060
Supercontig_12.4	5930664	5930665
Supercontig_12.4	5933702	5937092
Supercontig_12.4	5951165	5952350
Supercontig_12.4	5965018	5965019
Supercontig_12.4	5978365	5978366
Supercontig_12.4	5986208	5986209
Supercontig_12.4	5995647	6000561
Supercontig_12.5	171	2288
Supercontig_12.5	7029	7030
Supercontig_12.5	16820	18405
Supercontig_12.5	147021	147022
Supercontig_12.5	177285	177973
Supercontig_12.5	180847	180848
Supercontig_12.5	185468	188084
Supercontig_12.5	191276	191277
Supercontig_12.5	196276	196277
Supercontig_12.5	254815	256117
Supercontig_12.5	266068	266069
Supercontig_12.5	481999	482000
Supercontig_12.5	493188	493189
Supercontig_12.5	495285	495286
Supercontig_12.5	507625	507626
Supercontig_12.5	580940	581791
Supercontig_12.5	607066	608612
Supercontig_12.5	611843	614358
Supercontig_12.5	782213	782905
Supercontig_12.5	786973	786974
Supercontig_12.5	790189	790190
Supercontig_12.5	794569	796202
Supercontig_12.5	851464	855010
Supercontig_12.5	892220	893873
Supercontig_12.5	907250	907251
Supercontig_12.5	917249	917250
Supercontig_12.5	969637	969638
Supercontig_12.5	982203	983064
Supercontig_12.5	986211	986212
Supercontig_12.5	1016953	1016954
Supercontig_12.5	1122610	1122611
Supercontig_12.5	1153663	1153664
Supercontig_12.5	1188495	1188496
Supercontig_12.5	1215706	1218433
Supercontig_12.5	1224874	1227806
Supercontig_12.5	1301167	1303268
Supercontig_12.5	1306722	1306723
Supercontig_12.5	1309656	1311474
Supercontig_12.5	1428885	1432888
Supercontig_12.5	1538082	1538083
Supercontig_12.5	1689607	1691353
Supercontig_12.5	1699662	1701724
Supercontig_12.5	1753271	1754087
Supercontig_12.5	1764971	1766696
Supercontig_12.5	1992216	1992217
Supercontig_12.5	2204943	2207820
Supercontig_12.5	2278560	2278561
Supercontig_12.5	2287873	2287874
Supercontig_12.5	2505950	2505951
Supercontig_12.5	2594064	2595689
Supercontig_12.5	2599091	2599092
Supercontig_12.5	2604606	2604607
Supercontig_12.5	2619647	2619648
Supercontig_12.5	2623001	2625365
Supercontig_12.5	2659925	2659926
Supercontig_12.5	2811042	2811666
Supercontig_12.5	2833057	2833058
Supercontig_12.5	3432831	3433645
Supercontig_12.5	3439540	3439541
Supercontig_12.5	3445637	3447403
Supercontig_12.5	3852757	3852758
Supercontig_12.5	3907215	3908228
Supercontig_12.5	3913493	3913494
Supercontig_12.5	3930347	3931421
Supercontig_12.5	4033886	4037111
Supercontig_12.5	4062021	4065182
Supercontig_12.5	4093252	4093253
Supercontig_12.5	4159900	4161283
Supercontig_12.5	4168784	4170432
Supercontig_12.5	4235324	4239204
Supercontig_12.5	4246353	4249041
Supercontig_12.5	4442403	4442404
Supercontig_12.5	4445347	4446062
Supercontig_12.5	4451481	4451482
Supercontig_12.5	4466021	4467861
Supercontig_12.5	4471093	4472213
Supercontig_12.5	4507047	4508186
Supercontig_12.5	4517152	4519711
Supercontig_12.5	4783571	4785307
Supercontig_12.5	4797976	4799804
Supercontig_12.5	5071996	5072402
Supercontig_12.5	5228370	5228963
Supercontig_12.5	5235671	5236715
Supercontig_12.5	5407533	5409526
Supercontig_12.5	5419195	5420141
Supercontig_12.5	5429123	5429124
Supercontig_12.5	5656479	5659060
Supercontig_12.5	5663576	5663577
Supercontig_12.5	5688823	5688824
Supercontig_12.5	5694927	5696765
Supercontig_12.5	5700174	5700402
Supercontig_12.5	5702465	5702466
Supercontig_12.5	5705998	5705999
Supercontig_12.5	5709672	5709673
Supercontig_12.5	5712335	5713213
Supercontig_12.5	5851551	5851552
Supercontig_12.5	5891622	5893068
Supercontig_12.5	5914604	5916605
Supercontig_12.5	5981150	5981970
Supercontig_12.5	5996980	5996981
Supercontig_12.5	6017725	6017726
Supercontig_12.5	6019733	6021202
Supercontig_12.5	6070774	6070775
Supercontig_12.5	6075820	6075821
Supercontig_12.5	6077948	6078710
Supercontig_12.5	6081182	6081183
Supercontig_12.5	6104960	6105554
Supercontig_12.5	6107686	6107687
Supercontig_12.5	6109868	6109869
Supercontig_12.5	6111952	6111953
Supercontig_12.5	6140046	6141976
Supercontig_12.5	6149176	6151741
Supercontig_12.5	6178974	6181931
Supercontig_12.5	6188438	6190616
Supercontig_12.5	6391549	6391550
Supercontig_12.5	6436019	6436020
Supercontig_12.6	165	1162
Supercontig_12.6	96204	99403
Supercontig_12.6	105515	105516
Supercontig_12.6	107673	108834
Supercontig_12.6	117204	120227
Supercontig_12.6	269787	269788
Supercontig_12.6	272831	274826
Supercontig_12.6	361884	361885
Supercontig_12.6	364013	364014
Supercontig_12.6	370728	370729
Supercontig_12.6	373348	374318
Supercontig_12.6	378372	378373
Supercontig_12.6	388944	390658
Supercontig_12.6	433854	433855
Supercontig_12.6	436159	438114
Supercontig_12.6	441360	443104
Supercontig_12.6	502125	505550
Supercontig_12.6	519300	519301
Supercontig_12.6	556854	559597
Supercontig_12.6	1070164	1070773
Supercontig_12.6	1073994	1073995
Supercontig_12.6	1085374	1088083
Supercontig_12.6	1172103	1173290
Supercontig_12.6	1176475	1179632
Supercontig_12.6	1187117	1189526
Supercontig_12.6	1192406	1192407
Supercontig_12.6	1330801	1331811
Supercontig_12.6	1336309	1339094
Supercontig_12.6	1756368	1760226
Supercontig_12.6	1766248	1768317
Supercontig_12.6	1773398	1776838
Supercontig_12.6	1795080	1798658
Supercontig_12.6	1819058	1819059
Supercontig_12.6	1821437	1823208
Supercontig_12.6	1843603	1845622
Supercontig_12.6	1849233	1850702
Supercontig_12.6	1888362	1890192
Supercontig_12.6	1908754	1910246
Supercontig_12.6	2212114	2214909
Supercontig_12.6	2250621	2250622
Supercontig_12.6	2603098	2603099
Supercontig_12.6	2644565	2644566
Supercontig_12.6	2650439	2651401
Supercontig_12.6	2677112	2678747
Supercontig_12.6	2693377	2693378
Supercontig_12.6	2699760	2699761
Supercontig_12.6	2727171	2729602
Supercontig_12.6	2754914	2754915
Supercontig_12.6	2761244	2763949
Supercontig_12.6	2766481	2766482
Supercontig_12.6	2769877	2771828
Supercontig_12.6	2780253	2780254
Supercontig_12.6	2785421	2785422
Supercontig_12.6	2787760	2787761
Supercontig_12.6	2810708	2810709
Supercontig_12.6	2823631	2825502
Supercontig_12.6	2871129	2871130
Supercontig_12.6	2873782	2873783
Supercontig_12.6	2894425	2895151
Supercontig_12.6	2899714	2899715
Supercontig_12.6	2922373	2922374
Supercontig_12.6	2941835	2943164
Supercontig_12.6	2949091	2949756
Supercontig_12.6	2952714	2953544
Supercontig_12.6	2956364	2956365
Supercontig_12.6	2971117	2971118
Supercontig_12.6	3000028	3000029
Supercontig_12.6	3077182	3079964
Supercontig_12.6	3237735	3239941
Supercontig_12.6	3335143	3338288
Supercontig_12.6	3407404	3411235
Supercontig_12.6	3417802	3420300
Supercontig_12.6	3489395	3492611
Supercontig_12.6	3507513	3509294
Supercontig_12.6	3536443	3537724
Supercontig_12.6	3631021	3631022
Supercontig_12.6	3633709	3635150
Supercontig_12.6	3638059	3638060
Supercontig_12.6	3642872	3644736
Supercontig_12.6	3782227	3783882
Supercontig_12.6	3786004	3786829
Supercontig_12.6	3790005	3790006
Supercontig_12.6	3792288	3793810
Supercontig_12.6	4011478	4015942
Supercontig_12.6	4018958	4019309
Supercontig_12.6	4067685	4067686
Supercontig_12.6	4070088	4070089
Supercontig_12.6	4163160	4163161
Supercontig_12.6	4166251	4166252
Supercontig_12.6	4197652	4197653
Supercontig_12.6	4208976	4208977
Supercontig_12.6	4214646	4218160
Supercontig_12.7	231	232
Supercontig_12.7	49471	50617
Supercontig_12.7	79007	82583
Supercontig_12.7	136248	138014
Supercontig_12.7	142944	144850
Supercontig_12.7	150443	151954
Supercontig_12.7	185811	187277
Supercontig_12.7	192913	192914
Supercontig_12.7	259805	263510
Supercontig_12.7	274565	276375
Supercontig_12.7	291682	291683
Supercontig_12.7	327131	327837
Supercontig_12.7	340914	340915
Supercontig_12.7	348786	351555
Supercontig_12.7	502687	503447
Supercontig_12.7	505619	505620
Supercontig_12.7	520025	520026
Supercontig_12.7	523246	523247
Supercontig_12.7	525376	525377
Supercontig_12.7	610374	610375
Supercontig_12.7	613532	613533
Supercontig_12.7	615769	616779
Supercontig_12.7	623604	623605
Supercontig_12.7	703597	703598
Supercontig_12.7	811292	813594
Supercontig_12.7	816022	818054
Supercontig_12.7	891466	893088
Supercontig_12.7	901533	901959
Supercontig_12.7	907640	909074
Supercontig_12.7	1007753	1010477
Supercontig_12.7	1026123	1027269
Supercontig_12.7	1040169	1042139
Supercontig_12.7	1064324	1064325
Supercontig_12.7	1071300	1071301
Supercontig_12.7	1073567	1073568
Supercontig_12.7	1076970	1079000
Supercontig_12.7	1118466	1118467
Supercontig_12.7	1121147	1124545
Supercontig_12.7	1143218	1144313
Supercontig_12.7	1148272	1149390
Supercontig_12.7	1162153	1165743
Supercontig_12.7	1268895	1273075
Supercontig_12.7	1276539	1279685
Supercontig_12.7	1283029	1283030
Supercontig_12.7	1318977	1319979
Supercontig_12.7	1322080	1322081
Supercontig_12.7	1340760	1343957
Supercontig_12.7	1434470	1436733
Supercontig_12.7	1439227	1439228
Supercontig_12.7	1442617	1444552
Supercontig_12.7	1629079	1629080
Supercontig_12.7	1767634	1767635
Supercontig_12.7	1823811	1825692
Supercontig_12.7	1832044	1834758
Supercontig_12.7	1877955	1881563
Supercontig_12.7	2040373	2040374
Supercontig_12.7	2067040	2069397
Supercontig_12.7	2076422	2077519
Supercontig_12.7	2104066	2104878
Supercontig_12.7	2112445	2112446
Supercontig_12.7	2123190	2123765
Supercontig_12.7	2135691	2136844
Supercontig_12.7	2174748	2174749
Supercontig_12.7	2200145	2200146
Supercontig_12.7	2207459	2207460
Supercontig_12.7	2216585	2216586
Supercontig_12.7	2254250	2254251
Supercontig_12.7	2260950	2260951
Supercontig_12.7	2321638	2321639
Supercontig_12.7	2338068	2338069
Supercontig_12.7	2344131	2344132
Supercontig_12.7	2357632	2357633
Supercontig_12.7	2378923	2378924
Supercontig_12.7	2393632	2393633
Supercontig_12.7	2433046	2433047
Supercontig_12.7	2455954	2455955
Supercontig_12.7	2474386	2474387
Supercontig_12.7	2481475	2482543
Supercontig_12.7	2495226	2496847
Supercontig_12.7	2499560	2499561
Supercontig_12.7	2505115	2506393
Supercontig_12.7	2524502	2526497
Supercontig_12.7	2533301	2533302
Supercontig_12.7	2535323	2535697
Supercontig_12.7	2569244	2569245
Supercontig_12.7	2576634	2576635
Supercontig_12.7	2797510	2798481
Supercontig_12.7	2809087	2810413
Supercontig_12.7	2920648	2921766
Supercontig_12.7	2924574	2924575
Supercontig_12.7	2929736	2931231
Supercontig_12.7	3252540	3252541
Supercontig_12.7	3368754	3368755
Supercontig_12.7	3370874	3371913
Supercontig_12.7	3374279	3374280
Supercontig_12.7	3406713	3406714
Supercontig_12.7	3408873	3408874
Supercontig_12.7	3422328	3422329
Supercontig_12.7	3429003	3429004
Supercontig_12.7	3436004	3439280
Supercontig_12.7	3447116	3448372
Supercontig_12.7	3678027	3679207
Supercontig_12.7	3684200	3684840
Supercontig_12.7	3700456	3700457
Supercontig_12.7	3703427	3703428
Supercontig_12.7	4203672	4204744
Supercontig_12.7	4209295	4209296
Supercontig_12.7	4212612	4216214
Supercontig_12.7	4236319	4237975
Supercontig_12.7	4252697	4254252
Supercontig_12.8	141	2975
Supercontig_12.8	9228	9229
Supercontig_12.8	15002	15003
Supercontig_12.8	20210	20211
Supercontig_12.8	23217	23218
Supercontig_12.8	38326	39515
Supercontig_12.8	48196	48197
Supercontig_12.8	52646	52647
Supercontig_12.8	60900	60901
Supercontig_12.8	64767	64768
Supercontig_12.8	74280	74281
Supercontig_12.8	91112	92399
Supercontig_12.8	97598	97599
Supercontig_12.8	108629	109059
Supercontig_12.8	117879	117880
Supercontig_12.8	131261	131262
Supercontig_12.8	144037	145398
Supercontig_12.8	159544	161099
Supercontig_12.8	172353	172354
Supercontig_12.8	178366	178367
Supercontig_12.8	186598	192064
Supercontig_12.9	243	3446
Supercontig_12.9	14476	14477
Supercontig_12.9	21843	21844
Supercontig_12.9	32264	32265
Supercontig_12.9	39872	39873
Supercontig_12.9	45675	48701
Supercontig_12.9	60512	60513
Supercontig_12.9	65345	66368
Supercontig_12.9	72553	72554
Supercontig_12.9	74813	74814
Supercontig_12.9	84065	84066
Supercontig_12.9	86871	86872
Supercontig_12.9	89670	89671
Supercontig_12.9	109485	109486
Supercontig_12.9	115211	115212
Supercontig_12.9	119336	119337
Supercontig_12.9	122183	122184
Supercontig_12.9	132737	132738
Supercontig_12.9	135879	136974
Supercontig_12.9	141569	142238

## Sheet: MACS-H3K9me3-dim1-peaks
Supercontig_12.1	167	168
Supercontig_12.1	21704	21705
Supercontig_12.1	31903	33167
Supercontig_12.1	63247	65630
Supercontig_12.1	69978	69979
Supercontig_12.1	75789	75790
Supercontig_12.1	77883	77884
Supercontig_12.1	85279	88204
Supercontig_12.1	202181	203055
Supercontig_12.1	205192	206504
Supercontig_12.1	268108	269329
Supercontig_12.1	384413	384414
Supercontig_12.1	529209	529210
Supercontig_12.1	558763	558764
Supercontig_12.1	603693	606733
Supercontig_12.1	650033	651662
Supercontig_12.1	664041	664042
Supercontig_12.1	670636	670637
Supercontig_12.1	688818	689609
Supercontig_12.1	694327	696527
Supercontig_12.1	739883	739884
Supercontig_12.1	782201	782202
Supercontig_12.1	784434	784435
Supercontig_12.1	802815	802816
Supercontig_12.1	872749	875189
Supercontig_12.1	922194	924707
Supercontig_12.1	1182750	1185737
Supercontig_12.1	1219567	1219568
Supercontig_12.1	1226332	1228973
Supercontig_12.1	1309852	1311430
Supercontig_12.1	1337983	1337984
Supercontig_12.1	1340152	1340153
Supercontig_12.1	1347502	1348994
Supercontig_12.1	1391809	1391810
Supercontig_12.1	1567922	1567923
Supercontig_12.1	1579963	1579964
Supercontig_12.1	1584159	1584592
Supercontig_12.1	1709160	1710989
Supercontig_12.1	1759636	1759637
Supercontig_12.1	1823355	1823356
Supercontig_12.1	1843028	1843029
Supercontig_12.1	1925036	1925037
Supercontig_12.1	2001897	2001898
Supercontig_12.1	2007668	2008043
Supercontig_12.1	2020417	2020418
Supercontig_12.1	2074308	2074309
Supercontig_12.1	2216803	2216804
Supercontig_12.1	2246132	2247482
Supercontig_12.1	2273558	2281836
Supercontig_12.1	2312308	2312309
Supercontig_12.1	2321703	2321704
Supercontig_12.1	2339517	2342536
Supercontig_12.1	2368025	2368026
Supercontig_12.1	2382211	2383341
Supercontig_12.1	2400522	2400523
Supercontig_12.1	2403078	2404419
Supercontig_12.1	2552760	2553526
Supercontig_12.1	2601205	2601492
Supercontig_12.1	2894998	2894999
Supercontig_12.1	2947877	2947878
Supercontig_12.1	2966229	2966230
Supercontig_12.1	2978959	2978960
Supercontig_12.1	2989768	2989769
Supercontig_12.1	3017188	3018898
Supercontig_12.1	3033037	3033038
Supercontig_12.1	3065297	3065298
Supercontig_12.1	3130233	3132485
Supercontig_12.1	3159029	3159030
Supercontig_12.1	3227106	3227107
Supercontig_12.1	3290455	3290456
Supercontig_12.1	3295960	3295961
Supercontig_12.1	3357551	3357552
Supercontig_12.1	3378436	3378437
Supercontig_12.1	3455304	3455305
Supercontig_12.1	3476827	3478734
Supercontig_12.1	3494330	3495443
Supercontig_12.1	3512871	3512872
Supercontig_12.1	3529483	3529484
Supercontig_12.1	3553910	3553911
Supercontig_12.1	3564192	3565317
Supercontig_12.1	3576673	3576674
Supercontig_12.1	3579814	3579815
Supercontig_12.1	3586277	3586708
Supercontig_12.1	3595906	3596815
Supercontig_12.1	3637502	3637503
Supercontig_12.1	3641891	3643596
Supercontig_12.1	3656864	3658234
Supercontig_12.1	3663922	3663923
Supercontig_12.1	3672291	3672886
Supercontig_12.1	3680665	3681410
Supercontig_12.1	3683924	3683925
Supercontig_12.1	3696234	3696235
Supercontig_12.1	3701363	3702442
Supercontig_12.1	3708379	3708380
Supercontig_12.1	3715481	3716671
Supercontig_12.1	3726179	3726180
Supercontig_12.1	3728696	3729652
Supercontig_12.1	3735431	3736666
Supercontig_12.1	3757268	3757269
Supercontig_12.1	3781569	3781886
Supercontig_12.1	3819796	3819797
Supercontig_12.1	3864503	3864504
Supercontig_12.1	3906149	3906150
Supercontig_12.1	3943378	3943379
Supercontig_12.1	3970670	3970671
Supercontig_12.1	3975486	3975487
Supercontig_12.1	3985559	3986549
Supercontig_12.1	4005601	4005602
Supercontig_12.1	4013068	4013069
Supercontig_12.1	4019495	4019496
Supercontig_12.1	4037420	4038253
Supercontig_12.1	4043375	4044076
Supercontig_12.1	4046160	4046161
Supercontig_12.1	4098069	4098070
Supercontig_12.1	4162813	4166587
Supercontig_12.1	4172514	4172515
Supercontig_12.1	4194741	4194742
Supercontig_12.1	4213977	4213978
Supercontig_12.1	4244083	4244084
Supercontig_12.1	4246781	4246782
Supercontig_12.1	4277467	4278092
Supercontig_12.1	4295877	4295878
Supercontig_12.1	4314703	4316188
Supercontig_12.1	4324931	4324932
Supercontig_12.1	4333329	4333330
Supercontig_12.1	4353345	4355118
Supercontig_12.1	4376094	4376095
Supercontig_12.1	4386232	4386233
Supercontig_12.1	4432375	4433566
Supercontig_12.1	4440808	4440809
Supercontig_12.1	4531434	4531435
Supercontig_12.1	4534617	4534618
Supercontig_12.1	4543642	4543643
Supercontig_12.1	4551334	4552490
Supercontig_12.1	4605415	4605416
Supercontig_12.1	4669554	4669555
Supercontig_12.1	4841361	4841362
Supercontig_12.1	4861288	4862775
Supercontig_12.1	4878875	4882627
Supercontig_12.1	4896090	4897583
Supercontig_12.1	4923888	4923889
Supercontig_12.1	4934570	4934571
Supercontig_12.1	5006833	5010076
Supercontig_12.1	5022653	5022654
Supercontig_12.1	5069549	5069550
Supercontig_12.1	5078242	5081645
Supercontig_12.1	5093605	5093606
Supercontig_12.1	5200470	5200471
Supercontig_12.1	5242744	5242745
Supercontig_12.1	5264050	5264051
Supercontig_12.1	5317738	5317739
Supercontig_12.1	5338183	5339724
Supercontig_12.1	5352212	5352213
Supercontig_12.1	5355977	5355978
Supercontig_12.1	5395014	5395015
Supercontig_12.1	5401926	5401927
Supercontig_12.1	5415637	5415638
Supercontig_12.1	5482804	5482805
Supercontig_12.1	5492118	5492119
Supercontig_12.1	5497439	5499226
Supercontig_12.1	5530083	5530749
Supercontig_12.1	5532944	5532945
Supercontig_12.1	5542295	5542296
Supercontig_12.1	5544647	5544648
Supercontig_12.1	5624569	5624570
Supercontig_12.1	5735605	5736123
Supercontig_12.1	5772154	5772831
Supercontig_12.1	5805728	5805729
Supercontig_12.1	5807750	5807751
Supercontig_12.1	5815059	5815060
Supercontig_12.1	5825445	5825446
Supercontig_12.1	5920311	5922795
Supercontig_12.1	5941530	5944082
Supercontig_12.1	5955530	5956919
Supercontig_12.1	5962320	5962321
Supercontig_12.1	5974897	5976602
Supercontig_12.1	6026521	6026522
Supercontig_12.1	6079559	6081024
Supercontig_12.1	6105890	6105891
Supercontig_12.1	6128482	6128483
Supercontig_12.1	6157737	6158228
Supercontig_12.1	6197604	6197605
Supercontig_12.1	6199742	6199743
Supercontig_12.1	6250217	6251000
Supercontig_12.1	6259247	6259248
Supercontig_12.1	6261516	6261517
Supercontig_12.1	6265728	6265729
Supercontig_12.1	6298371	6299959
Supercontig_12.1	6332146	6332147
Supercontig_12.1	6384352	6384353
Supercontig_12.1	6386597	6386598
Supercontig_12.1	6427534	6427535
Supercontig_12.1	6452522	6453703
Supercontig_12.1	6457734	6457735
Supercontig_12.1	6470202	6471610
Supercontig_12.1	6473803	6473804
Supercontig_12.1	6501778	6504925
Supercontig_12.1	6522504	6522505
Supercontig_12.1	6525371	6525805
Supercontig_12.1	6600620	6600621
Supercontig_12.1	6623010	6623630
Supercontig_12.1	6659188	6661661
Supercontig_12.1	6675434	6676455
Supercontig_12.1	6728924	6728925
Supercontig_12.1	6760802	6760803
Supercontig_12.1	6770362	6770363
Supercontig_12.1	6819120	6819389
Supercontig_12.1	6960088	6960089
Supercontig_12.1	6970553	6970554
Supercontig_12.1	6998722	7001680
Supercontig_12.1	7107346	7108370
Supercontig_12.1	7237581	7237582
Supercontig_12.1	7322718	7323247
Supercontig_12.1	7359360	7359821
Supercontig_12.1	7373641	7373642
Supercontig_12.1	7425047	7425048
Supercontig_12.1	7462986	7462987
Supercontig_12.1	7507303	7510578
Supercontig_12.1	7555884	7555885
Supercontig_12.1	7562550	7562551
Supercontig_12.1	7612583	7612584
Supercontig_12.1	7711407	7711408
Supercontig_12.1	7748216	7748217
Supercontig_12.1	7894908	7894909
Supercontig_12.1	7959510	7960799
Supercontig_12.1	8153196	8153197
Supercontig_12.1	8227203	8228779
Supercontig_12.1	8265601	8266459
Supercontig_12.1	8270942	8270943
Supercontig_12.1	8279473	8281281
Supercontig_12.1	8291283	8292586
Supercontig_12.1	8320105	8320106
Supercontig_12.1	8325027	8326398
Supercontig_12.1	8328548	8328549
Supercontig_12.1	8366322	8368817
Supercontig_12.1	8374125	8374126
Supercontig_12.1	8439841	8440905
Supercontig_12.1	8455009	8455010
Supercontig_12.1	8492681	8495323
Supercontig_12.1	8529540	8529541
Supercontig_12.1	8582705	8582706
Supercontig_12.1	8622662	8622663
Supercontig_12.1	8713804	8713805
Supercontig_12.1	8786475	8787342
Supercontig_12.1	8818216	8818811
Supercontig_12.1	8893948	8895106
Supercontig_12.1	8952962	8953669
Supercontig_12.1	8992660	8993356
Supercontig_12.1	8997548	8999716
Supercontig_12.1	9018550	9019756
Supercontig_12.1	9035306	9035307
Supercontig_12.1	9163864	9163865
Supercontig_12.1	9172879	9174807
Supercontig_12.1	9287340	9288498
Supercontig_12.1	9290625	9290626
Supercontig_12.1	9334011	9337073
Supercontig_12.1	9359277	9359278
Supercontig_12.1	9362637	9362638
Supercontig_12.1	9367782	9367783
Supercontig_12.1	9407899	9407900
Supercontig_12.1	9482167	9484672
Supercontig_12.1	9488977	9488978
Supercontig_12.1	9508272	9510348
Supercontig_12.1	9513411	9515058
Supercontig_12.1	9698201	9698202
Supercontig_12.1	9705900	9708362
Supercontig_12.1	9721819	9721820
Supercontig_12.1	9755418	9758022
Supercontig_12.1	9773330	9775122
Supercontig_12.1	9796144	9796145
Supercontig_12.1	9798647	9798648
Supercontig_12.10	115	2658
Supercontig_12.10	22013	22014
Supercontig_12.10	33269	33270
Supercontig_12.10	77890	77891
Supercontig_12.10	87825	89675
Supercontig_12.10	101888	101889
Supercontig_12.10	115587	115588
Supercontig_12.10	123245	125264
Supercontig_12.11	134	2485
Supercontig_12.11	28845	31379
Supercontig_12.12	380	4208
Supercontig_12.12	6762	6763
Supercontig_12.12	12841	12842
Supercontig_12.12	16529	19009
Supercontig_12.13	127	2509
Supercontig_12.13	10472	13397
Supercontig_12.14	607	2157
Supercontig_12.14	6302	10960
Supercontig_12.15	335	2492
Supercontig_12.15	5535	6489
Supercontig_12.15	8615	8616
Supercontig_12.16	117	8874
Supercontig_12.17	208	1435
Supercontig_12.17	3739	6595
Supercontig_12.18	277	5626
Supercontig_12.19	266	3363
Supercontig_12.2	132	8184
Supercontig_12.2	13860	13861
Supercontig_12.2	109615	109616
Supercontig_12.2	113880	113881
Supercontig_12.2	124706	124707
Supercontig_12.2	144083	146478
Supercontig_12.2	348619	348620
Supercontig_12.2	373547	373548
Supercontig_12.2	378904	378905
Supercontig_12.2	391159	392618
Supercontig_12.2	398050	400282
Supercontig_12.2	454092	454093
Supercontig_12.2	486243	486244
Supercontig_12.2	517070	517071
Supercontig_12.2	572904	577009
Supercontig_12.2	604169	604170
Supercontig_12.2	626197	626198
Supercontig_12.2	685429	687948
Supercontig_12.2	700740	702295
Supercontig_12.2	706092	707563
Supercontig_12.2	784599	784600
Supercontig_12.2	875467	876649
Supercontig_12.2	882396	882397
Supercontig_12.2	1016648	1020383
Supercontig_12.2	1066626	1068195
Supercontig_12.2	1074204	1076534
Supercontig_12.2	1096205	1096206
Supercontig_12.2	1149767	1151259
Supercontig_12.2	1158674	1158675
Supercontig_12.2	1161720	1161721
Supercontig_12.2	1217113	1217114
Supercontig_12.2	1219676	1219677
Supercontig_12.2	1240952	1240953
Supercontig_12.2	1254478	1255122
Supercontig_12.2	1344332	1344333
Supercontig_12.2	1364714	1365398
Supercontig_12.2	1380787	1380788
Supercontig_12.2	1433272	1433273
Supercontig_12.2	1437419	1442014
Supercontig_12.2	1521654	1522147
Supercontig_12.2	1607765	1607766
Supercontig_12.2	1630419	1630420
Supercontig_12.2	1639030	1639031
Supercontig_12.2	1721092	1722673
Supercontig_12.2	1728173	1728174
Supercontig_12.2	1732119	1733939
Supercontig_12.2	1749607	1749608
Supercontig_12.2	1752669	1753868
Supercontig_12.2	1797227	1797843
Supercontig_12.2	1822084	1822085
Supercontig_12.2	1989454	1991023
Supercontig_12.2	1995014	1995015
Supercontig_12.2	2000990	2000991
Supercontig_12.2	2113608	2113609
Supercontig_12.2	2169117	2170096
Supercontig_12.2	2180411	2180412
Supercontig_12.2	2222368	2222369
Supercontig_12.2	2232640	2232641
Supercontig_12.2	2239884	2239885
Supercontig_12.2	2280425	2280426
Supercontig_12.2	2389733	2389734
Supercontig_12.2	2415275	2415276
Supercontig_12.2	2418881	2419380
Supercontig_12.2	2454966	2454967
Supercontig_12.2	2576739	2579392
Supercontig_12.2	2592144	2592145
Supercontig_12.2	2716744	2716745
Supercontig_12.2	2722751	2722752
Supercontig_12.2	2791132	2791133
Supercontig_12.2	2795551	2795552
Supercontig_12.2	2849110	2853061
Supercontig_12.2	2883252	2883253
Supercontig_12.2	2903224	2904991
Supercontig_12.2	2918960	2920850
Supercontig_12.2	3089145	3089715
Supercontig_12.2	3094610	3094611
Supercontig_12.2	3159403	3159404
Supercontig_12.2	3198285	3199683
Supercontig_12.2	3245840	3245841
Supercontig_12.2	3271401	3272027
Supercontig_12.2	3274482	3274483
Supercontig_12.2	3276716	3276717
Supercontig_12.2	3303163	3305899
Supercontig_12.2	3313083	3314529
Supercontig_12.2	3319967	3321063
Supercontig_12.2	3341907	3341908
Supercontig_12.2	3367308	3368611
Supercontig_12.2	3376813	3376814
Supercontig_12.2	3385711	3386975
Supercontig_12.2	3453443	3453444
Supercontig_12.2	3481235	3481236
Supercontig_12.2	3493498	3494592
Supercontig_12.2	3499387	3499388
Supercontig_12.2	3501570	3502466
Supercontig_12.2	3540936	3540937
Supercontig_12.2	3566647	3566648
Supercontig_12.2	3602717	3603621
Supercontig_12.2	3607206	3607207
Supercontig_12.2	3631235	3631236
Supercontig_12.2	3635524	3635525
Supercontig_12.2	3642902	3644031
Supercontig_12.2	3649793	3650095
Supercontig_12.2	3654344	3654345
Supercontig_12.2	3688769	3690700
Supercontig_12.2	3693425	3694854
Supercontig_12.2	3699168	3699169
Supercontig_12.2	3710531	3712366
Supercontig_12.2	3864205	3865637
Supercontig_12.2	3889155	3889698
Supercontig_12.2	3903358	3903359
Supercontig_12.2	3906956	3906957
Supercontig_12.2	3911014	3911015
Supercontig_12.2	3925937	3929487
Supercontig_12.2	3934448	3935804
Supercontig_12.2	3981832	3981833
Supercontig_12.2	4010794	4010795
Supercontig_12.2	4098789	4100283
Supercontig_12.2	4116073	4116074
Supercontig_12.2	4120060	4121038
Supercontig_12.2	4139465	4139466
Supercontig_12.2	4144191	4145207
Supercontig_12.2	4153179	4158346
Supercontig_12.2	4206363	4206364
Supercontig_12.2	4209171	4209172
Supercontig_12.2	4242467	4243280
Supercontig_12.2	4260491	4262126
Supercontig_12.2	4345344	4347845
Supercontig_12.2	4357933	4359498
Supercontig_12.2	4445339	4445340
Supercontig_12.2	4470670	4471948
Supercontig_12.2	4475486	4477744
Supercontig_12.20	1083	1084
Supercontig_12.3	249	250
Supercontig_12.3	6842	8533
Supercontig_12.3	47642	47643
Supercontig_12.3	62371	62372
Supercontig_12.3	77143	77144
Supercontig_12.3	133295	134481
Supercontig_12.3	145909	147485
Supercontig_12.3	150791	150792
Supercontig_12.3	181798	181799
Supercontig_12.3	186306	188015
Supercontig_12.3	209167	209168
Supercontig_12.3	267877	267878
Supercontig_12.3	302853	303444
Supercontig_12.3	325958	326673
Supercontig_12.3	348000	348687
Supercontig_12.3	365529	367767
Supercontig_12.3	378277	379228
Supercontig_12.3	433340	433661
Supercontig_12.3	446278	447599
Supercontig_12.3	475491	475492
Supercontig_12.3	485435	486102
Supercontig_12.3	504835	504836
Supercontig_12.3	564368	567848
Supercontig_12.3	607590	607591
Supercontig_12.3	645353	645354
Supercontig_12.3	672914	672915
Supercontig_12.3	696184	696700
Supercontig_12.3	711715	712279
Supercontig_12.3	749747	749748
Supercontig_12.3	775346	775347
Supercontig_12.3	781379	782499
Supercontig_12.3	801444	801445
Supercontig_12.3	856237	856238
Supercontig_12.3	892690	892691
Supercontig_12.3	902567	902568
Supercontig_12.3	942559	942560
Supercontig_12.3	947097	947098
Supercontig_12.3	956536	956537
Supercontig_12.3	963637	963998
Supercontig_12.3	967520	967521
Supercontig_12.3	993905	993906
Supercontig_12.3	1023641	1023642
Supercontig_12.3	1042752	1042753
Supercontig_12.3	1054760	1058391
Supercontig_12.3	1084547	1084548
Supercontig_12.3	1113793	1113794
Supercontig_12.3	1165444	1165445
Supercontig_12.3	1192673	1192674
Supercontig_12.3	1242652	1242653
Supercontig_12.3	1253077	1253078
Supercontig_12.3	1255494	1255782
Supercontig_12.3	1270887	1274223
Supercontig_12.3	1340472	1345854
Supercontig_12.3	1387961	1389786
Supercontig_12.3	1497058	1497059
Supercontig_12.3	1562800	1562801
Supercontig_12.3	1572028	1572476
Supercontig_12.3	1598023	1598024
Supercontig_12.3	1619600	1622009
Supercontig_12.3	1702816	1705069
Supercontig_12.3	1730942	1732222
Supercontig_12.3	1737243	1738558
Supercontig_12.3	1749318	1749319
Supercontig_12.3	1801262	1801263
Supercontig_12.3	1815361	1815362
Supercontig_12.3	1893170	1893171
Supercontig_12.3	1897834	1900582
Supercontig_12.3	1975924	1975925
Supercontig_12.3	1979436	1979437
Supercontig_12.3	2024544	2024545
Supercontig_12.3	2185920	2187214
Supercontig_12.3	2233892	2236319
Supercontig_12.3	2256198	2256199
Supercontig_12.3	2275572	2275573
Supercontig_12.3	2289355	2290600
Supercontig_12.3	2294623	2295568
Supercontig_12.3	2303960	2303961
Supercontig_12.3	2416274	2416275
Supercontig_12.3	2424289	2425662
Supercontig_12.3	2443009	2443010
Supercontig_12.3	2472579	2472580
Supercontig_12.3	2480050	2480051
Supercontig_12.3	2501572	2501573
Supercontig_12.3	2520869	2522984
Supercontig_12.3	2569994	2569995
Supercontig_12.3	2581932	2581933
Supercontig_12.3	2698357	2700046
Supercontig_12.3	2726596	2726597
Supercontig_12.3	2745046	2745375
Supercontig_12.3	2748240	2748241
Supercontig_12.3	2760495	2760496
Supercontig_12.3	2762780	2762781
Supercontig_12.3	2768447	2768448
Supercontig_12.3	2821851	2823765
Supercontig_12.3	2829570	2832859
Supercontig_12.3	2881319	2882099
Supercontig_12.3	2888256	2888257
Supercontig_12.3	2890627	2890628
Supercontig_12.3	2966076	2967073
Supercontig_12.3	2971823	2973062
Supercontig_12.3	3223525	3223526
Supercontig_12.3	3513734	3513735
Supercontig_12.3	3519077	3519078
Supercontig_12.3	3521377	3521378
Supercontig_12.3	3556533	3559326
Supercontig_12.3	3578263	3578264
Supercontig_12.3	3661531	3661532
Supercontig_12.3	3860916	3860917
Supercontig_12.3	3928381	3929890
Supercontig_12.3	3985180	3985181
Supercontig_12.3	4073676	4075834
Supercontig_12.3	4093062	4095439
Supercontig_12.3	4152487	4152488
Supercontig_12.3	4249201	4249202
Supercontig_12.3	4256380	4259204
Supercontig_12.3	4280291	4281492
Supercontig_12.3	4334946	4334947
Supercontig_12.3	4443252	4443253
Supercontig_12.3	4528769	4532042
Supercontig_12.3	4580351	4582686
Supercontig_12.3	4588345	4589637
Supercontig_12.3	4591900	4594654
Supercontig_12.3	4687713	4687714
Supercontig_12.3	4853768	4854261
Supercontig_12.3	5001567	5001923
Supercontig_12.3	5046958	5049669
Supercontig_12.3	5064467	5064468
Supercontig_12.3	5085238	5085718
Supercontig_12.3	5157539	5158095
Supercontig_12.3	5169371	5170816
Supercontig_12.3	5208019	5209244
Supercontig_12.3	5212643	5214107
Supercontig_12.3	5272382	5272383
Supercontig_12.3	5274625	5274626
Supercontig_12.4	697	698
Supercontig_12.4	36911	40843
Supercontig_12.4	44794	46741
Supercontig_12.4	115079	115869
Supercontig_12.4	118079	118080
Supercontig_12.4	139905	141120
Supercontig_12.4	364644	365555
Supercontig_12.4	368033	369208
Supercontig_12.4	431751	431752
Supercontig_12.4	455884	455885
Supercontig_12.4	756476	756477
Supercontig_12.4	830541	831065
Supercontig_12.4	876143	876144
Supercontig_12.4	910268	910269
Supercontig_12.4	967786	967787
Supercontig_12.4	991560	991561
Supercontig_12.4	996086	996735
Supercontig_12.4	1002093	1002094
Supercontig_12.4	1009173	1009174
Supercontig_12.4	1017580	1017581
Supercontig_12.4	1048770	1049523
Supercontig_12.4	1058851	1058852
Supercontig_12.4	1074488	1075186
Supercontig_12.4	1085847	1087727
Supercontig_12.4	1108088	1110636
Supercontig_12.4	1125568	1125569
Supercontig_12.4	1153492	1153493
Supercontig_12.4	1172242	1173172
Supercontig_12.4	1234127	1234128
Supercontig_12.4	1273621	1273622
Supercontig_12.4	1280274	1280275
Supercontig_12.4	1308491	1309049
Supercontig_12.4	1419912	1419913
Supercontig_12.4	1443833	1444917
Supercontig_12.4	1454755	1454756
Supercontig_12.4	1476582	1476583
Supercontig_12.4	1481630	1483125
Supercontig_12.4	1550090	1550091
Supercontig_12.4	1697630	1697631
Supercontig_12.4	1761400	1761401
Supercontig_12.4	1811416	1811936
Supercontig_12.4	1864156	1864157
Supercontig_12.4	1881964	1881965
Supercontig_12.4	1902420	1902421
Supercontig_12.4	1906089	1906090
Supercontig_12.4	1930853	1932156
Supercontig_12.4	1997620	1997621
Supercontig_12.4	2018881	2019442
Supercontig_12.4	2040725	2040726
Supercontig_12.4	2048473	2048474
Supercontig_12.4	2050537	2052093
Supercontig_12.4	2130841	2131390
Supercontig_12.4	2177935	2177936
Supercontig_12.4	2246298	2246299
Supercontig_12.4	2249849	2249850
Supercontig_12.4	2314465	2314466
Supercontig_12.4	2336691	2337322
Supercontig_12.4	2350910	2350911
Supercontig_12.4	2376983	2378921
Supercontig_12.4	2388764	2392534
Supercontig_12.4	2468712	2468713
Supercontig_12.4	2496185	2496186
Supercontig_12.4	2517310	2517780
Supercontig_12.4	2545287	2545288
Supercontig_12.4	2608924	2611524
Supercontig_12.4	2620019	2622647
Supercontig_12.4	2629550	2629551
Supercontig_12.4	2661069	2664643
Supercontig_12.4	2711244	2712870
Supercontig_12.4	2718804	2720073
Supercontig_12.4	2736265	2737413
Supercontig_12.4	2903609	2903610
Supercontig_12.4	2912133	2912134
Supercontig_12.4	2997855	2997856
Supercontig_12.4	3053886	3054395
Supercontig_12.4	3081367	3082774
Supercontig_12.4	3418533	3418534
Supercontig_12.4	3542342	3542343
Supercontig_12.4	3679798	3681693
Supercontig_12.4	3723119	3723120
Supercontig_12.4	3734384	3734385
Supercontig_12.4	3743947	3745137
Supercontig_12.4	3769383	3769384
Supercontig_12.4	3850303	3850304
Supercontig_12.4	3883704	3883705
Supercontig_12.4	3996510	3996511
Supercontig_12.4	4031712	4034548
Supercontig_12.4	4047020	4047021
Supercontig_12.4	4062178	4063015
Supercontig_12.4	4168392	4168924
Supercontig_12.4	4170928	4170929
Supercontig_12.4	4178482	4178483
Supercontig_12.4	4231561	4234343
Supercontig_12.4	4239322	4240525
Supercontig_12.4	4251751	4252270
Supercontig_12.4	4264308	4264309
Supercontig_12.4	4282877	4282878
Supercontig_12.4	4295591	4295592
Supercontig_12.4	4300621	4301107
Supercontig_12.4	4323735	4323736
Supercontig_12.4	4389095	4389096
Supercontig_12.4	4430762	4430763
Supercontig_12.4	4449058	4449059
Supercontig_12.4	4455132	4455133
Supercontig_12.4	4457818	4458364
Supercontig_12.4	4482852	4483744
Supercontig_12.4	4499927	4499928
Supercontig_12.4	4626857	4626858
Supercontig_12.4	4658212	4660033
Supercontig_12.4	4757519	4757520
Supercontig_12.4	4769671	4770358
Supercontig_12.4	4772363	4772364
Supercontig_12.4	4856665	4856666
Supercontig_12.4	4898413	4898887
Supercontig_12.4	5018456	5018932
Supercontig_12.4	5037314	5038016
Supercontig_12.4	5169408	5169409
Supercontig_12.4	5186255	5186256
Supercontig_12.4	5210004	5210749
Supercontig_12.4	5213548	5213549
Supercontig_12.4	5233900	5233901
Supercontig_12.4	5246959	5248742
Supercontig_12.4	5308823	5310248
Supercontig_12.4	5322129	5322130
Supercontig_12.4	5330278	5331442
Supercontig_12.4	5391784	5391785
Supercontig_12.4	5436358	5436359
Supercontig_12.4	5464888	5464889
Supercontig_12.4	5467999	5470767
Supercontig_12.4	5475660	5475661
Supercontig_12.4	5494512	5494513
Supercontig_12.4	5659624	5660621
Supercontig_12.4	5677542	5678010
Supercontig_12.4	5757372	5759169
Supercontig_12.4	5814608	5814609
Supercontig_12.4	5856155	5856156
Supercontig_12.4	5864913	5864914
Supercontig_12.4	5872750	5877488
Supercontig_12.4	5888760	5888761
Supercontig_12.4	5915335	5915711
Supercontig_12.4	5918286	5918287
Supercontig_12.4	5931139	5931140
Supercontig_12.4	5933358	5936478
Supercontig_12.4	5952371	5952737
Supercontig_12.4	5979555	5979556
Supercontig_12.4	6000614	6000615
Supercontig_12.5	183	2274
Supercontig_12.5	7134	7135
Supercontig_12.5	17842	18745
Supercontig_12.5	147064	147065
Supercontig_12.5	177406	178027
Supercontig_12.5	185475	188082
Supercontig_12.5	191532	192204
Supercontig_12.5	194414	195792
Supercontig_12.5	254874	256913
Supercontig_12.5	263033	264085
Supercontig_12.5	296125	296126
Supercontig_12.5	308864	310836
Supercontig_12.5	338619	338620
Supercontig_12.5	493458	495393
Supercontig_12.5	508032	508033
Supercontig_12.5	580863	583337
Supercontig_12.5	585885	585886
Supercontig_12.5	612002	614387
Supercontig_12.5	627460	628486
Supercontig_12.5	711079	711080
Supercontig_12.5	782216	782217
Supercontig_12.5	794625	794948
Supercontig_12.5	827479	827480
Supercontig_12.5	852207	852208
Supercontig_12.5	854407	855022
Supercontig_12.5	891640	894006
Supercontig_12.5	921846	921847
Supercontig_12.5	929355	929356
Supercontig_12.5	966728	966729
Supercontig_12.5	969647	969648
Supercontig_12.5	983062	983063
Supercontig_12.5	986188	986189
Supercontig_12.5	1005308	1005309
Supercontig_12.5	1016774	1016775
Supercontig_12.5	1120276	1120277
Supercontig_12.5	1177280	1178233
Supercontig_12.5	1215790	1217848
Supercontig_12.5	1225794	1227467
Supercontig_12.5	1275946	1275947
Supercontig_12.5	1301352	1301353
Supercontig_12.5	1308762	1310667
Supercontig_12.5	1429430	1432435
Supercontig_12.5	1538237	1538238
Supercontig_12.5	1640127	1640431
Supercontig_12.5	1658570	1658571
Supercontig_12.5	1690546	1690547
Supercontig_12.5	1692715	1692716
Supercontig_12.5	1697956	1697957
Supercontig_12.5	1700027	1701029
Supercontig_12.5	1753664	1756005
Supercontig_12.5	1765917	1766827
Supercontig_12.5	1850192	1850193
Supercontig_12.5	1911368	1911369
Supercontig_12.5	1990834	1990835
Supercontig_12.5	2078518	2079608
Supercontig_12.5	2128300	2129157
Supercontig_12.5	2152145	2152146
Supercontig_12.5	2160237	2160238
Supercontig_12.5	2183211	2183866
Supercontig_12.5	2205671	2207498
Supercontig_12.5	2209808	2209809
Supercontig_12.5	2270357	2270358
Supercontig_12.5	2274482	2274483
Supercontig_12.5	2278557	2281974
Supercontig_12.5	2287856	2287857
Supercontig_12.5	2326829	2326830
Supercontig_12.5	2358778	2358779
Supercontig_12.5	2427138	2427139
Supercontig_12.5	2506902	2506903
Supercontig_12.5	2540993	2540994
Supercontig_12.5	2594184	2596508
Supercontig_12.5	2604433	2605296
Supercontig_12.5	2623008	2625343
Supercontig_12.5	2659730	2659731
Supercontig_12.5	2811724	2811725
Supercontig_12.5	2833188	2833189
Supercontig_12.5	3244365	3244864
Supercontig_12.5	3250638	3250639
Supercontig_12.5	3270481	3270482
Supercontig_12.5	3277410	3277411
Supercontig_12.5	3344064	3345726
Supercontig_12.5	3425415	3425416
Supercontig_12.5	3433528	3433529
Supercontig_12.5	3444587	3447465
Supercontig_12.5	3612431	3612432
Supercontig_12.5	3619118	3619119
Supercontig_12.5	3723116	3723117
Supercontig_12.5	3852710	3852711
Supercontig_12.5	3855746	3855747
Supercontig_12.5	3907236	3908257
Supercontig_12.5	3930195	3931622
Supercontig_12.5	3966503	3966504
Supercontig_12.5	3981303	3981304
Supercontig_12.5	3987099	3988741
Supercontig_12.5	3994792	3994793
Supercontig_12.5	4033888	4034579
Supercontig_12.5	4065052	4065053
Supercontig_12.5	4071479	4071480
Supercontig_12.5	4094117	4094118
Supercontig_12.5	4160047	4161257
Supercontig_12.5	4170142	4170143
Supercontig_12.5	4235820	4236630
Supercontig_12.5	4246687	4248511
Supercontig_12.5	4274805	4274806
Supercontig_12.5	4289117	4289933
Supercontig_12.5	4305004	4305005
Supercontig_12.5	4331823	4331824
Supercontig_12.5	4398801	4400098
Supercontig_12.5	4410256	4410257
Supercontig_12.5	4428453	4428454
Supercontig_12.5	4442353	4444155
Supercontig_12.5	4470920	4472373
Supercontig_12.5	4489344	4489978
Supercontig_12.5	4507069	4508348
Supercontig_12.5	4519429	4519430
Supercontig_12.5	4700850	4704113
Supercontig_12.5	4783564	4784503
Supercontig_12.5	4799455	4799837
Supercontig_12.5	4973385	4973386
Supercontig_12.5	5044492	5044493
Supercontig_12.5	5071878	5072418
Supercontig_12.5	5127936	5127937
Supercontig_12.5	5130497	5130498
Supercontig_12.5	5229001	5229563
Supercontig_12.5	5235653	5236737
Supercontig_12.5	5241854	5241855
Supercontig_12.5	5349512	5350605
Supercontig_12.5	5407032	5407033
Supercontig_12.5	5419335	5419915
Supercontig_12.5	5429129	5429130
Supercontig_12.5	5656520	5657535
Supercontig_12.5	5663136	5663565
Supercontig_12.5	5688748	5688749
Supercontig_12.5	5700132	5700133
Supercontig_12.5	5705995	5705996
Supercontig_12.5	5712367	5713274
Supercontig_12.5	5807023	5807024
Supercontig_12.5	5851185	5851186
Supercontig_12.5	5891707	5892301
Supercontig_12.5	5914018	5916428
Supercontig_12.5	5980992	5981936
Supercontig_12.5	6001179	6001180
Supercontig_12.5	6020628	6021272
Supercontig_12.5	6068956	6070803
Supercontig_12.5	6077945	6077946
Supercontig_12.5	6080625	6080626
Supercontig_12.5	6105206	6105506
Supercontig_12.5	6108739	6112016
Supercontig_12.5	6130231	6130593
Supercontig_12.5	6140049	6141398
Supercontig_12.5	6149183	6149798
Supercontig_12.5	6179449	6180555
Supercontig_12.5	6189823	6190405
Supercontig_12.5	6206472	6206473
Supercontig_12.5	6292916	6292917
Supercontig_12.5	6389525	6391518
Supercontig_12.5	6436036	6436037
Supercontig_12.6	158	1131
Supercontig_12.6	96137	98610
Supercontig_12.6	105704	106204
Supercontig_12.6	108806	108807
Supercontig_12.6	118875	120137
Supercontig_12.6	269410	269411
Supercontig_12.6	271705	271706
Supercontig_12.6	273848	274770
Supercontig_12.6	309125	310973
Supercontig_12.6	318413	322159
Supercontig_12.6	362482	363367
Supercontig_12.6	370723	370724
Supercontig_12.6	373343	375365
Supercontig_12.6	378944	378945
Supercontig_12.6	387062	389285
Supercontig_12.6	433850	435211
Supercontig_12.6	441386	443180
Supercontig_12.6	499773	505384
Supercontig_12.6	508558	508559
Supercontig_12.6	518264	519277
Supercontig_12.6	532591	532592
Supercontig_12.6	539791	539792
Supercontig_12.6	556335	559547
Supercontig_12.6	588232	588233
Supercontig_12.6	698729	698730
Supercontig_12.6	753632	754794
Supercontig_12.6	763447	763448
Supercontig_12.6	993452	993453
Supercontig_12.6	1042570	1042571
Supercontig_12.6	1070518	1072145
Supercontig_12.6	1085356	1087532
Supercontig_12.6	1140077	1140078
Supercontig_12.6	1172497	1173301
Supercontig_12.6	1177616	1177617
Supercontig_12.6	1187104	1189498
Supercontig_12.6	1192218	1192219
Supercontig_12.6	1250388	1251073
Supercontig_12.6	1330891	1331557
Supercontig_12.6	1336322	1338699
Supercontig_12.6	1482924	1482925
Supercontig_12.6	1570103	1570104
Supercontig_12.6	1756671	1759997
Supercontig_12.6	1767124	1767642
Supercontig_12.6	1773000	1776072
Supercontig_12.6	1795082	1797087
Supercontig_12.6	1822289	1823073
Supercontig_12.6	1844350	1845044
Supercontig_12.6	1849223	1850502
Supercontig_12.6	1888945	1888946
Supercontig_12.6	1909634	1909635
Supercontig_12.6	2036456	2037769
Supercontig_12.6	2062305	2063046
Supercontig_12.6	2071465	2071466
Supercontig_12.6	2165451	2166414
Supercontig_12.6	2212122	2212123
Supercontig_12.6	2239299	2239300
Supercontig_12.6	2250607	2250608
Supercontig_12.6	2273368	2273369
Supercontig_12.6	2316323	2316324
Supercontig_12.6	2360380	2360381
Supercontig_12.6	2390535	2390536
Supercontig_12.6	2414889	2414890
Supercontig_12.6	2432181	2434127
Supercontig_12.6	2563147	2563148
Supercontig_12.6	2601498	2603324
Supercontig_12.6	2614834	2614835
Supercontig_12.6	2637024	2637025
Supercontig_12.6	2644601	2644602
Supercontig_12.6	2650913	2651483
Supercontig_12.6	2670905	2670906
Supercontig_12.6	2677173	2677627
Supercontig_12.6	2680818	2682919
Supercontig_12.6	2686633	2686634
Supercontig_12.6	2699398	2699399
Supercontig_12.6	2727005	2729539
Supercontig_12.6	2739817	2739818
Supercontig_12.6	2750396	2750397
Supercontig_12.6	2755063	2756857
Supercontig_12.6	2762355	2766301
Supercontig_12.6	2769854	2771302
Supercontig_12.6	2780279	2780280
Supercontig_12.6	2810734	2810735
Supercontig_12.6	2823621	2823622
Supercontig_12.6	2836058	2836059
Supercontig_12.6	2873743	2873744
Supercontig_12.6	2880557	2880558
Supercontig_12.6	2922360	2922361
Supercontig_12.6	2942919	2942920
Supercontig_12.6	2949890	2949891
Supercontig_12.6	2951939	2956207
Supercontig_12.6	2973839	2973840
Supercontig_12.6	3046286	3046287
Supercontig_12.6	3056911	3056912
Supercontig_12.6	3075964	3079688
Supercontig_12.6	3157078	3157079
Supercontig_12.6	3237517	3237518
Supercontig_12.6	3240475	3240476
Supercontig_12.6	3260658	3261037
Supercontig_12.6	3335166	3337140
Supercontig_12.6	3339202	3339203
Supercontig_12.6	3407983	3407984
Supercontig_12.6	3411242	3411243
Supercontig_12.6	3414744	3414745
Supercontig_12.6	3417784	3419977
Supercontig_12.6	3489725	3490097
Supercontig_12.6	3492387	3492388
Supercontig_12.6	3508158	3508159
Supercontig_12.6	3511225	3511226
Supercontig_12.6	3535647	3537533
Supercontig_12.6	3631801	3631802
Supercontig_12.6	3635161	3635162
Supercontig_12.6	3638043	3638044
Supercontig_12.6	3643584	3644673
Supercontig_12.6	3782839	3782840
Supercontig_12.6	3786776	3786777
Supercontig_12.6	3792642	3793698
Supercontig_12.6	3883820	3883821
Supercontig_12.6	4012406	4014501
Supercontig_12.6	4017636	4019281
Supercontig_12.6	4023397	4023861
Supercontig_12.6	4029073	4029632
Supercontig_12.6	4067817	4067818
Supercontig_12.6	4070048	4070422
Supercontig_12.6	4163647	4163648
Supercontig_12.6	4172972	4172973
Supercontig_12.6	4199105	4199106
Supercontig_12.6	4216092	4217964
Supercontig_12.7	258	259
Supercontig_12.7	49420	51439
Supercontig_12.7	79018	82748
Supercontig_12.7	136356	138543
Supercontig_12.7	142941	147872
Supercontig_12.7	150474	151774
Supercontig_12.7	185984	186738
Supercontig_12.7	191217	192733
Supercontig_12.7	260726	262812
Supercontig_12.7	274687	274688
Supercontig_12.7	292302	292303
Supercontig_12.7	327666	330518
Supercontig_12.7	348746	351145
Supercontig_12.7	399126	400253
Supercontig_12.7	503209	504744
Supercontig_12.7	520057	520058
Supercontig_12.7	524840	524841
Supercontig_12.7	567047	567791
Supercontig_12.7	575969	575970
Supercontig_12.7	610778	611388
Supercontig_12.7	623426	623427
Supercontig_12.7	626527	627650
Supercontig_12.7	736139	737646
Supercontig_12.7	811329	811330
Supercontig_12.7	817252	817253
Supercontig_12.7	839437	839438
Supercontig_12.7	857497	857498
Supercontig_12.7	892352	892353
Supercontig_12.7	894465	894466
Supercontig_12.7	901971	901972
Supercontig_12.7	907590	908245
Supercontig_12.7	1008635	1009230
Supercontig_12.7	1027674	1027675
Supercontig_12.7	1040822	1042137
Supercontig_12.7	1064300	1064301
Supercontig_12.7	1069547	1069548
Supercontig_12.7	1074491	1074492
Supercontig_12.7	1078207	1078765
Supercontig_12.7	1118072	1118073
Supercontig_12.7	1120989	1122553
Supercontig_12.7	1124652	1124653
Supercontig_12.7	1143179	1145106
Supercontig_12.7	1148321	1148927
Supercontig_12.7	1163080	1165378
Supercontig_12.7	1268867	1271179
Supercontig_12.7	1279649	1279650
Supercontig_12.7	1283110	1283111
Supercontig_12.7	1320055	1321909
Supercontig_12.7	1342050	1343526
Supercontig_12.7	1408609	1409289
Supercontig_12.7	1434485	1436725
Supercontig_12.7	1438979	1438980
Supercontig_12.7	1444509	1444510
Supercontig_12.7	1526827	1526828
Supercontig_12.7	1629514	1629515
Supercontig_12.7	1724818	1724819
Supercontig_12.7	1767678	1767679
Supercontig_12.7	1824016	1824017
Supercontig_12.7	1834721	1834722
Supercontig_12.7	1878288	1880936
Supercontig_12.7	1945102	1945103
Supercontig_12.7	1947801	1947802
Supercontig_12.7	1967632	1967633
Supercontig_12.7	1995221	1995222
Supercontig_12.7	2067086	2067087
Supercontig_12.7	2076479	2077182
Supercontig_12.7	2089131	2089132
Supercontig_12.7	2102981	2102982
Supercontig_12.7	2105050	2105051
Supercontig_12.7	2112369	2112370
Supercontig_12.7	2122772	2123642
Supercontig_12.7	2135955	2136832
Supercontig_12.7	2207490	2207491
Supercontig_12.7	2216618	2216619
Supercontig_12.7	2310837	2310838
Supercontig_12.7	2330315	2330316
Supercontig_12.7	2336784	2336785
Supercontig_12.7	2353201	2353202
Supercontig_12.7	2378889	2378890
Supercontig_12.7	2393673	2393674
Supercontig_12.7	2433027	2433028
Supercontig_12.7	2455956	2455957
Supercontig_12.7	2480958	2481474
Supercontig_12.7	2486174	2486175
Supercontig_12.7	2495400	2495401
Supercontig_12.7	2505187	2506384
Supercontig_12.7	2524394	2525563
Supercontig_12.7	2535240	2535667
Supercontig_12.7	2547594	2547994
Supercontig_12.7	2552558	2552559
Supercontig_12.7	2569354	2569355
Supercontig_12.7	2578634	2579973
Supercontig_12.7	2585888	2587898
Supercontig_12.7	2638811	2638812
Supercontig_12.7	2708785	2708786
Supercontig_12.7	2724414	2724415
Supercontig_12.7	2797497	2797988
Supercontig_12.7	2809937	2810803
Supercontig_12.7	2835141	2835142
Supercontig_12.7	2877353	2877354
Supercontig_12.7	2891932	2891933
Supercontig_12.7	2921163	2922424
Supercontig_12.7	2924586	2924587
Supercontig_12.7	2929642	2930833
Supercontig_12.7	3066761	3067950
Supercontig_12.7	3131239	3131240
Supercontig_12.7	3181030	3181031
Supercontig_12.7	3190498	3190499
Supercontig_12.7	3252597	3252598
Supercontig_12.7	3329394	3329395
Supercontig_12.7	3372463	3374042
Supercontig_12.7	3384291	3384292
Supercontig_12.7	3407293	3407637
Supercontig_12.7	3409835	3409836
Supercontig_12.7	3431206	3431683
Supercontig_12.7	3436525	3439442
Supercontig_12.7	3446148	3448616
Supercontig_12.7	3520429	3520430
Supercontig_12.7	3544343	3544344
Supercontig_12.7	3678761	3680409
Supercontig_12.7	3684844	3684845
Supercontig_12.7	3700432	3701049
Supercontig_12.7	3703242	3703243
Supercontig_12.7	4105295	4105296
Supercontig_12.7	4204074	4205102
Supercontig_12.7	4209277	4210672
Supercontig_12.7	4214341	4215372
Supercontig_12.7	4237118	4237119
Supercontig_12.7	4253498	4255159
Supercontig_12.8	167	3450
Supercontig_12.8	6200	6201
Supercontig_12.8	23169	23170
Supercontig_12.8	38308	38309
Supercontig_12.8	52655	52656
Supercontig_12.8	60397	60898
Supercontig_12.8	74293	74294
Supercontig_12.8	82419	82420
Supercontig_12.8	85346	85347
Supercontig_12.8	91432	92261
Supercontig_12.8	96507	97722
Supercontig_12.8	109084	109085
Supercontig_12.8	120432	120433
Supercontig_12.8	131277	131278
Supercontig_12.8	150420	150421
Supercontig_12.8	169744	169745
Supercontig_12.8	176227	176228
Supercontig_12.8	181923	181924
Supercontig_12.8	186594	191844
Supercontig_12.9	223	224
Supercontig_12.9	2696	3455
Supercontig_12.9	13411	13412
Supercontig_12.9	39879	39880
Supercontig_12.9	47017	48660
Supercontig_12.9	60511	60512
Supercontig_12.9	66361	66362
Supercontig_12.9	72567	72568
Supercontig_12.9	74859	74860
Supercontig_12.9	84087	84088
Supercontig_12.9	86871	86872
Supercontig_12.9	98686	98687
Supercontig_12.9	101676	101677
Supercontig_12.9	104653	104654
Supercontig_12.9	115209	115210
Supercontig_12.9	119325	119326
Supercontig_12.9	135918	136968
Supercontig_12.9	140799	141582

## Sheet: SICER-H3K9me3-WT-peaks
Supercontig_12.1	1	1501
Supercontig_12.1	20501	34501
Supercontig_12.1	62501	89001
Supercontig_12.1	134001	135001
Supercontig_12.1	199001	209501
Supercontig_12.1	266501	291501
Supercontig_12.1	384001	385501
Supercontig_12.1	558501	559501
Supercontig_12.1	669001	698001
Supercontig_12.1	871501	925001
Supercontig_12.1	1182001	1186501
Supercontig_12.1	1219001	1229501
Supercontig_12.1	1337001	1350501
Supercontig_12.1	1549501	1551001
Supercontig_12.1	1944501	1947501
Supercontig_12.1	2271001	2342501
Supercontig_12.1	2381501	2404501
Supercontig_12.1	3062001	3065501
Supercontig_12.1	3476501	3495501
Supercontig_12.1	3553001	3566001
Supercontig_12.1	3579501	3580501
Supercontig_12.1	3595001	3664501
Supercontig_12.1	3678501	3989501
Supercontig_12.1	4005001	4099001
Supercontig_12.1	4160501	4196001
Supercontig_12.1	4212501	4214501
Supercontig_12.1	4313501	4356501
Supercontig_12.1	4375501	4377001
Supercontig_12.1	4531001	4544001
Supercontig_12.1	4877501	4883501
Supercontig_12.1	4923501	4925501
Supercontig_12.1	5006001	5011001
Supercontig_12.1	5077501	5082501
Supercontig_12.1	5263001	5265501
Supercontig_12.1	5317501	5340001
Supercontig_12.1	5394501	5402001
Supercontig_12.1	5481501	5499501
Supercontig_12.1	5529501	5545501
Supercontig_12.1	5734501	5773001
Supercontig_12.1	5805001	5809001
Supercontig_12.1	5919501	5944501
Supercontig_12.1	5954501	5977001
Supercontig_12.1	6196501	6200001
Supercontig_12.1	6248001	6263501
Supercontig_12.1	6297501	6333501
Supercontig_12.1	6383001	6459001
Supercontig_12.1	6470001	6474501
Supercontig_12.1	6501501	6505001
Supercontig_12.1	6520501	6529001
Supercontig_12.1	6600001	6601001
Supercontig_12.1	6998001	7003001
Supercontig_12.1	7373501	7374001
Supercontig_12.1	7423501	7427501
Supercontig_12.1	7506501	7511501
Supercontig_12.1	7711001	7712501
Supercontig_12.1	8227001	8267501
Supercontig_12.1	8279001	8293501
Supercontig_12.1	8992001	9000001
Supercontig_12.1	9163501	9175001
Supercontig_12.1	9286501	9338001
Supercontig_12.1	9359001	9360501
Supercontig_12.1	9406501	9408001
Supercontig_12.1	9481501	9515501
Supercontig_12.1	9697001	9701001
Supercontig_12.1	9705501	9759501
Supercontig_12.1	9772001	9798501
Supercontig_12.10	1	125001
Supercontig_12.11	1	31501
Supercontig_12.12	1	19501
Supercontig_12.13	1	13501
Supercontig_12.14	1	11501
Supercontig_12.15	1	9001
Supercontig_12.16	1	8501
Supercontig_12.17	1	6501
Supercontig_12.18	1	6001
Supercontig_12.19	1	4501
Supercontig_12.2	1	9501
Supercontig_12.2	13001	17001
Supercontig_12.2	108001	147501
Supercontig_12.2	390501	401001
Supercontig_12.2	516001	518501
Supercontig_12.2	572001	577501
Supercontig_12.2	684501	688501
Supercontig_12.2	699501	709001
Supercontig_12.2	873001	883001
Supercontig_12.2	1016001	1021001
Supercontig_12.2	1066001	1077501
Supercontig_12.2	1092501	1151501
Supercontig_12.2	1155001	1366501
Supercontig_12.2	1437001	1444001
Supercontig_12.2	1720001	1735001
Supercontig_12.2	1989001	2002501
Supercontig_12.2	2113001	2171001
Supercontig_12.2	2230501	2234001
Supercontig_12.2	2791001	2791501
Supercontig_12.2	2795001	2796501
Supercontig_12.2	2848501	2853501
Supercontig_12.2	2902501	2921501
Supercontig_12.2	3040501	3042001
Supercontig_12.2	3245501	3248001
Supercontig_12.2	3302501	3322001
Supercontig_12.2	3366001	3388001
Supercontig_12.2	3492501	3503001
Supercontig_12.2	3602001	3714501
Supercontig_12.2	3888001	3937001
Supercontig_12.2	4097501	4122001
Supercontig_12.2	4138501	4146001
Supercontig_12.2	4152001	4159501
Supercontig_12.2	4205501	4209501
Supercontig_12.2	4241001	4262501
Supercontig_12.2	4344501	4359501
Supercontig_12.2	4469501	4478501
Supercontig_12.20	1	1501
Supercontig_12.3	1	10001
Supercontig_12.3	61501	78001
Supercontig_12.3	133001	148001
Supercontig_12.3	180501	189001
Supercontig_12.3	267001	269001
Supercontig_12.3	301001	329001
Supercontig_12.3	345501	381001
Supercontig_12.3	430001	449001
Supercontig_12.3	473501	486501
Supercontig_12.3	564001	568501
Supercontig_12.3	672001	673001
Supercontig_12.3	683501	968001
Supercontig_12.3	1040501	1060001
Supercontig_12.3	1252501	1275001
Supercontig_12.3	1338501	1346001
Supercontig_12.3	1386501	1390001
Supercontig_12.3	1702501	1750001
Supercontig_12.3	1814001	1817501
Supercontig_12.3	2184501	2238001
Supercontig_12.3	2288501	2296501
Supercontig_12.3	2423001	2445001
Supercontig_12.3	2759501	2763501
Supercontig_12.3	2821001	2834001
Supercontig_12.3	2881001	2891001
Supercontig_12.3	2965501	2974001
Supercontig_12.3	3518001	3522001
Supercontig_12.3	3554501	3560501
Supercontig_12.3	3578001	3579001
Supercontig_12.3	4073001	4096001
Supercontig_12.3	4255501	4282501
Supercontig_12.3	4528001	4533001
Supercontig_12.3	4577501	4597001
Supercontig_12.3	4827501	4858001
Supercontig_12.3	5045501	5050501
Supercontig_12.3	5061501	5088501
Supercontig_12.3	5207001	5215001
Supercontig_12.3	5271501	5274501
Supercontig_12.4	1	3001
Supercontig_12.4	36501	47501
Supercontig_12.4	113001	142001
Supercontig_12.4	363001	374001
Supercontig_12.4	872001	1089501
Supercontig_12.4	1106001	1112001
Supercontig_12.4	1125001	1173501
Supercontig_12.4	1273001	1275001
Supercontig_12.4	1417501	1420501
Supercontig_12.4	1443001	1485001
Supercontig_12.4	1697001	1700001
Supercontig_12.4	1761001	1762001
Supercontig_12.4	1880501	1933501
Supercontig_12.4	2018001	2051001
Supercontig_12.4	2336001	2380501
Supercontig_12.4	2388501	2393001
Supercontig_12.4	2545001	2547501
Supercontig_12.4	2608001	2623001
Supercontig_12.4	2660501	2665001
Supercontig_12.4	2710501	2738001
Supercontig_12.4	2997001	3000001
Supercontig_12.4	3052001	3083501
Supercontig_12.4	3742501	3770501
Supercontig_12.4	4031501	4064001
Supercontig_12.4	4167501	4180501
Supercontig_12.4	4230501	4242001
Supercontig_12.4	4250001	4302001
Supercontig_12.4	4386501	4389501
Supercontig_12.4	4448001	4460001
Supercontig_12.4	4481001	4484501
Supercontig_12.4	4625001	4660501
Supercontig_12.4	4769001	4772501
Supercontig_12.4	5017001	5039001
Supercontig_12.4	5209001	5250501
Supercontig_12.4	5308001	5333001
Supercontig_12.4	5813501	5815501
Supercontig_12.4	5847501	5866001
Supercontig_12.4	5871001	5879501
Supercontig_12.4	5887501	5889501
Supercontig_12.4	5913001	5938001
Supercontig_12.4	5950001	6000501
Supercontig_12.5	1	22501
Supercontig_12.5	146501	148001
Supercontig_12.5	176501	196501
Supercontig_12.5	254001	267001
Supercontig_12.5	493001	508501
Supercontig_12.5	580501	615001
Supercontig_12.5	779001	797501
Supercontig_12.5	851001	856001
Supercontig_12.5	890001	1229501
Supercontig_12.5	1300001	1312001
Supercontig_12.5	1428001	1433501
Supercontig_12.5	1537001	1538501
Supercontig_12.5	1689001	1702001
Supercontig_12.5	1752501	1767501
Supercontig_12.5	1990001	1992501
Supercontig_12.5	2204501	2208501
Supercontig_12.5	2278001	2282501
Supercontig_12.5	2287501	2288001
Supercontig_12.5	2505501	2507001
Supercontig_12.5	2592501	2626001
Supercontig_12.5	2659001	2661001
Supercontig_12.5	2832501	2833501
Supercontig_12.5	3432001	3448001
Supercontig_12.5	3612001	3613001
Supercontig_12.5	3851001	3853001
Supercontig_12.5	3906501	3932001
Supercontig_12.5	4032501	4065501
Supercontig_12.5	4092001	4096001
Supercontig_12.5	4159501	4171001
Supercontig_12.5	4235001	4249501
Supercontig_12.5	4442001	4472501
Supercontig_12.5	4506501	4520001
Supercontig_12.5	4783001	4800501
Supercontig_12.5	5071501	5072501
Supercontig_12.5	5227001	5238001
Supercontig_12.5	5406501	5421001
Supercontig_12.5	5656001	5714001
Supercontig_12.5	5851001	5852001
Supercontig_12.5	5890501	5917001
Supercontig_12.5	5980001	6022001
Supercontig_12.5	6067001	6082501
Supercontig_12.5	6104501	6113001
Supercontig_12.5	6139501	6153001
Supercontig_12.5	6175501	6192501
Supercontig_12.5	6389001	6392001
Supercontig_12.5	6434001	6436001
Supercontig_12.6	1	2001
Supercontig_12.6	95501	100001
Supercontig_12.6	105001	120501
Supercontig_12.6	269001	275501
Supercontig_12.6	309501	311501
Supercontig_12.6	314001	320001
Supercontig_12.6	360501	393001
Supercontig_12.6	432501	445001
Supercontig_12.6	501501	506501
Supercontig_12.6	556001	561001
Supercontig_12.6	1069501	1089001
Supercontig_12.6	1171501	1193501
Supercontig_12.6	1328501	1340001
Supercontig_12.6	1756001	1760501
Supercontig_12.6	1766001	1777501
Supercontig_12.6	1794001	1824001
Supercontig_12.6	1843001	1875501
Supercontig_12.6	1905001	1908501
Supercontig_12.6	1934501	1959001
Supercontig_12.6	1983501	1991001
Supercontig_12.6	2031501	2033001
Supercontig_12.6	2383501	2387501
Supercontig_12.6	2420001	2424501
Supercontig_12.6	2724501	2747501
Supercontig_12.6	2783501	3082001
Supercontig_12.6	3237001	3241001
Supercontig_12.6	3334501	3339501
Supercontig_12.6	3407001	3421001
Supercontig_12.6	3488001	3494001
Supercontig_12.6	3506001	3538001
Supercontig_12.6	3630501	3646001
Supercontig_12.6	3781501	3795001
Supercontig_12.6	4010501	4020501
Supercontig_12.6	4028501	4029501
Supercontig_12.6	4066501	4071001
Supercontig_12.6	4161001	4218001
Supercontig_12.7	1	2001
Supercontig_12.7	78501	83501
Supercontig_12.7	135501	153001
Supercontig_12.7	185501	193001
Supercontig_12.7	259501	264501
Supercontig_12.7	274001	292501
Supercontig_12.7	326001	352501
Supercontig_12.7	502001	526001
Supercontig_12.7	610001	624001
Supercontig_12.7	703001	704501
Supercontig_12.7	810501	818501
Supercontig_12.7	889501	910001
Supercontig_12.7	1007001	1031501
Supercontig_12.7	1039001	1079501
Supercontig_12.7	1117001	1149501
Supercontig_12.7	1161501	1166501
Supercontig_12.7	1268501	1283501
Supercontig_12.7	1318001	1345001
Supercontig_12.7	1434001	1445001
Supercontig_12.7	1628501	1630001
Supercontig_12.7	1767001	1769501
Supercontig_12.7	1823001	1835501
Supercontig_12.7	1877501	1882001
Supercontig_12.7	2064501	2070501
Supercontig_12.7	2075501	2105501
Supercontig_12.7	2123001	2126501
Supercontig_12.7	2134001	2484001
Supercontig_12.7	2494501	2506501
Supercontig_12.7	2524001	2536001
Supercontig_12.7	2568501	2569501
Supercontig_12.7	2576001	2579501
Supercontig_12.7	2796501	2811001
Supercontig_12.7	2920001	2932001
Supercontig_12.7	3252001	3254001
Supercontig_12.7	3368001	3375501
Supercontig_12.7	3405001	3441001
Supercontig_12.7	3445501	3449501
Supercontig_12.7	3677501	3704001
Supercontig_12.7	4203501	4217001
Supercontig_12.7	4234501	4255001
Supercontig_12.8	1	192001
Supercontig_12.9	1	142001

## Sheet: SICER-H3K9me3-dim1-peaks
Supercontig_12.1	1	1501
Supercontig_12.1	20501	34001
Supercontig_12.1	62501	89001
Supercontig_12.1	199501	208501
Supercontig_12.1	267001	288501
Supercontig_12.1	383501	386501
Supercontig_12.1	528501	530501
Supercontig_12.1	602501	607001
Supercontig_12.1	663501	664501
Supercontig_12.1	669501	697501
Supercontig_12.1	802001	804501
Supercontig_12.1	871501	925001
Supercontig_12.1	1112001	1112501
Supercontig_12.1	1182001	1186501
Supercontig_12.1	1218001	1229501
Supercontig_12.1	1336501	1350501
Supercontig_12.1	1579001	1580501
Supercontig_12.1	1708501	1711501
Supercontig_12.1	1842501	1843501
Supercontig_12.1	2271001	2343501
Supercontig_12.1	2381501	2404501
Supercontig_12.1	2978501	2979501
Supercontig_12.1	3015501	3021001
Supercontig_12.1	3061501	3065501
Supercontig_12.1	3157501	3159501
Supercontig_12.1	3357001	3358001
Supercontig_12.1	3377001	3379001
Supercontig_12.1	3454001	3456501
Supercontig_12.1	3476501	3495501
Supercontig_12.1	3529001	3530001
Supercontig_12.1	3552001	3566001
Supercontig_12.1	3576501	3580501
Supercontig_12.1	3585501	3587001
Supercontig_12.1	3595501	3638001
Supercontig_12.1	3640501	3664501
Supercontig_12.1	3671001	3674001
Supercontig_12.1	3680001	3709501
Supercontig_12.1	3714001	3730001
Supercontig_12.1	3734501	3987501
Supercontig_12.1	4004501	4040501
Supercontig_12.1	4043001	4099001
Supercontig_12.1	4162001	4197001
Supercontig_12.1	4212501	4215001
Supercontig_12.1	4276001	4278001
Supercontig_12.1	4313501	4356501
Supercontig_12.1	4375501	4377001
Supercontig_12.1	4385501	4386501
Supercontig_12.1	4432001	4433501
Supercontig_12.1	4531001	4544501
Supercontig_12.1	4550501	4553001
Supercontig_12.1	4861001	4863501
Supercontig_12.1	4878501	4883001
Supercontig_12.1	4923001	4925501
Supercontig_12.1	4932501	4935001
Supercontig_12.1	5006501	5011001
Supercontig_12.1	5021501	5024501
Supercontig_12.1	5078001	5082501
Supercontig_12.1	5262001	5265501
Supercontig_12.1	5317501	5340501
Supercontig_12.1	5355001	5357001
Supercontig_12.1	5394501	5402001
Supercontig_12.1	5481501	5499501
Supercontig_12.1	5529501	5545501
Supercontig_12.1	5734501	5773001
Supercontig_12.1	5805001	5809001
Supercontig_12.1	5814001	5815501
Supercontig_12.1	5918501	5945001
Supercontig_12.1	5955001	5977501
Supercontig_12.1	6078501	6082001
Supercontig_12.1	6196501	6200501
Supercontig_12.1	6249001	6267001
Supercontig_12.1	6298001	6333501
Supercontig_12.1	6383001	6460001
Supercontig_12.1	6470001	6474501
Supercontig_12.1	6501501	6506001
Supercontig_12.1	6520501	6528501
Supercontig_12.1	6600001	6601501
Supercontig_12.1	6760001	6761501
Supercontig_12.1	6998001	7002501
Supercontig_12.1	7373001	7374001
Supercontig_12.1	7423501	7427001
Supercontig_12.1	7506501	7511501
Supercontig_12.1	7561501	7563001
Supercontig_12.1	7711001	7712501
Supercontig_12.1	7959001	7962001
Supercontig_12.1	8225001	8267501
Supercontig_12.1	8279001	8293501
Supercontig_12.1	8365501	8371001
Supercontig_12.1	8373501	8374501
Supercontig_12.1	8454501	8455501
Supercontig_12.1	8529001	8530001
Supercontig_12.1	8622001	8623001
Supercontig_12.1	8893501	8895501
Supercontig_12.1	8991501	9001501
Supercontig_12.1	9034501	9035501
Supercontig_12.1	9163501	9175001
Supercontig_12.1	9286501	9337501
Supercontig_12.1	9358501	9363001
Supercontig_12.1	9406501	9408501
Supercontig_12.1	9481501	9515501
Supercontig_12.1	9697501	9701001
Supercontig_12.1	9705001	9758501
Supercontig_12.1	9772501	9798501
Supercontig_12.10	1	125001
Supercontig_12.11	1	31501
Supercontig_12.12	1	19501
Supercontig_12.13	1	13501
Supercontig_12.14	1	11501
Supercontig_12.15	1	9001
Supercontig_12.16	1	8501
Supercontig_12.17	1	6501
Supercontig_12.18	1	6001
Supercontig_12.19	1	4501
Supercontig_12.2	1	9001
Supercontig_12.2	13001	16001
Supercontig_12.2	109001	147501
Supercontig_12.2	348001	349501
Supercontig_12.2	373501	374001
Supercontig_12.2	390501	401001
Supercontig_12.2	453001	454501
Supercontig_12.2	515501	520501
Supercontig_12.2	572001	577501
Supercontig_12.2	684501	688501
Supercontig_12.2	699501	708001
Supercontig_12.2	874001	883001
Supercontig_12.2	1016001	1021001
Supercontig_12.2	1065001	1077001
Supercontig_12.2	1094001	1152001
Supercontig_12.2	1155001	1366501
Supercontig_12.2	1436001	1443501
Supercontig_12.2	1629501	1631501
Supercontig_12.2	1720501	1734501
Supercontig_12.2	1749001	1750001
Supercontig_12.2	1796501	1799501
Supercontig_12.2	1989001	2002001
Supercontig_12.2	2113001	2171001
Supercontig_12.2	2230501	2235001
Supercontig_12.2	2239501	2240001
Supercontig_12.2	2454001	2455501
Supercontig_12.2	2591001	2592501
Supercontig_12.2	2715501	2717501
Supercontig_12.2	2791001	2791501
Supercontig_12.2	2795001	2796501
Supercontig_12.2	2848501	2853501
Supercontig_12.2	2902001	2921501
Supercontig_12.2	3159001	3160001
Supercontig_12.2	3198001	3200501
Supercontig_12.2	3245501	3248001
Supercontig_12.2	3302501	3322501
Supercontig_12.2	3366001	3387501
Supercontig_12.2	3493001	3503001
Supercontig_12.2	3601501	3713001
Supercontig_12.2	3863001	3866001
Supercontig_12.2	3888501	3936501
Supercontig_12.2	3981501	3982001
Supercontig_12.2	4009501	4013001
Supercontig_12.2	4098001	4121501
Supercontig_12.2	4138501	4146001
Supercontig_12.2	4151501	4159001
Supercontig_12.2	4205501	4209501
Supercontig_12.2	4241501	4262501
Supercontig_12.2	4344501	4360001
Supercontig_12.2	4470001	4478501
Supercontig_12.20	1	1501
Supercontig_12.3	1	10001
Supercontig_12.3	61501	78001
Supercontig_12.3	133001	151501
Supercontig_12.3	180501	189001
Supercontig_12.3	208501	209501
Supercontig_12.3	267001	269001
Supercontig_12.3	301501	327501
Supercontig_12.3	346501	381001
Supercontig_12.3	430501	448501
Supercontig_12.3	474501	486501
Supercontig_12.3	564001	568501
Supercontig_12.3	607501	608001
Supercontig_12.3	672001	673501
Supercontig_12.3	683501	968001
Supercontig_12.3	1041501	1059501
Supercontig_12.3	1252001	1274501
Supercontig_12.3	1340001	1346001
Supercontig_12.3	1386501	1390001
Supercontig_12.3	1702001	1750001
Supercontig_12.3	1814001	1817501
Supercontig_12.3	2185001	2238501
Supercontig_12.3	2288501	2296501
Supercontig_12.3	2303001	2305001
Supercontig_12.3	2416001	2416501
Supercontig_12.3	2423501	2445001
Supercontig_12.3	2472001	2473001
Supercontig_12.3	2519001	2525501
Supercontig_12.3	2568501	2572001
Supercontig_12.3	2696501	2700501
Supercontig_12.3	2759501	2764001
Supercontig_12.3	2820001	2834001
Supercontig_12.3	2881001	2892001
Supercontig_12.3	2965501	2974001
Supercontig_12.3	3222501	3224001
Supercontig_12.3	3518001	3522001
Supercontig_12.3	3554501	3560501
Supercontig_12.3	3578001	3579001
Supercontig_12.3	4073001	4098001
Supercontig_12.3	4151001	4153001
Supercontig_12.3	4255001	4282001
Supercontig_12.3	4332001	4335501
Supercontig_12.3	4528001	4532501
Supercontig_12.3	4578501	4596501
Supercontig_12.3	4828501	4856501
Supercontig_12.3	5000501	5003001
Supercontig_12.3	5045501	5050501
Supercontig_12.3	5063501	5088001
Supercontig_12.3	5207001	5215001
Supercontig_12.3	5271501	5274501
Supercontig_12.4	1	2001
Supercontig_12.4	36501	47501
Supercontig_12.4	113501	141501
Supercontig_12.4	363501	373501
Supercontig_12.4	431501	432501
Supercontig_12.4	455501	456501
Supercontig_12.4	755501	757001
Supercontig_12.4	874501	1089001
Supercontig_12.4	1107001	1112001
Supercontig_12.4	1124501	1173501
Supercontig_12.4	1273001	1275501
Supercontig_12.4	1418001	1420501
Supercontig_12.4	1443001	1484501
Supercontig_12.4	1549501	1550501
Supercontig_12.4	1697001	1700001
Supercontig_12.4	1761001	1762501
Supercontig_12.4	1880001	1932501
Supercontig_12.4	2018001	2052501
Supercontig_12.4	2177001	2178501
Supercontig_12.4	2244501	2252001
Supercontig_12.4	2336001	2379501
Supercontig_12.4	2388501	2393501
Supercontig_12.4	2544001	2548001
Supercontig_12.4	2608001	2623001
Supercontig_12.4	2629001	2630501
Supercontig_12.4	2660501	2665001
Supercontig_12.4	2710501	2714001
Supercontig_12.4	2718001	2738001
Supercontig_12.4	2997001	3000001
Supercontig_12.4	3052001	3084001
Supercontig_12.4	3542001	3543001
Supercontig_12.4	3679001	3682501
Supercontig_12.4	3734001	3735001
Supercontig_12.4	3743001	3770501
Supercontig_12.4	4031501	4064001
Supercontig_12.4	4167501	4180001
Supercontig_12.4	4230501	4241501
Supercontig_12.4	4250001	4301501
Supercontig_12.4	4387001	4389501
Supercontig_12.4	4448001	4459501
Supercontig_12.4	4481501	4484501
Supercontig_12.4	4624501	4661001
Supercontig_12.4	4768501	4772501
Supercontig_12.4	4898001	4899501
Supercontig_12.4	5017001	5039001
Supercontig_12.4	5168001	5170001
Supercontig_12.4	5209001	5249501
Supercontig_12.4	5307501	5332501
Supercontig_12.4	5390501	5393001
Supercontig_12.4	5436001	5437001
Supercontig_12.4	5463001	5471501
Supercontig_12.4	5474501	5476001
Supercontig_12.4	5756001	5760501
Supercontig_12.4	5848001	5848501
Supercontig_12.4	5853001	5865501
Supercontig_12.4	5872001	5878501
Supercontig_12.4	5888001	5889001
Supercontig_12.4	5914001	5937501
Supercontig_12.4	5951001	6000501
Supercontig_12.5	1	19001
Supercontig_12.5	146501	148001
Supercontig_12.5	177001	196501
Supercontig_12.5	254501	266001
Supercontig_12.5	493001	508501
Supercontig_12.5	580001	615001
Supercontig_12.5	779001	796501
Supercontig_12.5	851001	856001
Supercontig_12.5	891001	1219001
Supercontig_12.5	1224001	1228001
Supercontig_12.5	1300501	1312001
Supercontig_12.5	1428501	1433501
Supercontig_12.5	1689501	1702001
Supercontig_12.5	1751501	1768001
Supercontig_12.5	1989501	1992501
Supercontig_12.5	2077501	2081001
Supercontig_12.5	2151501	2154001
Supercontig_12.5	2183001	2184001
Supercontig_12.5	2202001	2211501
Supercontig_12.5	2274001	2275001
Supercontig_12.5	2277501	2282501
Supercontig_12.5	2287001	2288501
Supercontig_12.5	2426501	2428501
Supercontig_12.5	2505501	2507001
Supercontig_12.5	2593501	2626001
Supercontig_12.5	2658501	2661001
Supercontig_12.5	2810501	2812501
Supercontig_12.5	2832501	2833501
Supercontig_12.5	3276501	3278001
Supercontig_12.5	3343501	3348501
Supercontig_12.5	3424001	3425501
Supercontig_12.5	3432501	3447501
Supercontig_12.5	3612001	3613001
Supercontig_12.5	3850501	3857001
Supercontig_12.5	3906001	3932001
Supercontig_12.5	3981001	3990501
Supercontig_12.5	3993001	3996501
Supercontig_12.5	4032501	4066001
Supercontig_12.5	4092001	4096001
Supercontig_12.5	4159001	4171001
Supercontig_12.5	4235001	4249501
Supercontig_12.5	4304001	4305501
Supercontig_12.5	4397501	4400501
Supercontig_12.5	4427001	4430501
Supercontig_12.5	4441501	4472501
Supercontig_12.5	4489001	4490501
Supercontig_12.5	4506501	4520001
Supercontig_12.5	4783001	4800501
Supercontig_12.5	5227501	5237501
Supercontig_12.5	5406001	5421001
Supercontig_12.5	5656001	5714501
Supercontig_12.5	5850501	5852001
Supercontig_12.5	5890501	5917001
Supercontig_12.5	5980501	6022001
Supercontig_12.5	6067501	6081501
Supercontig_12.5	6104501	6113001
Supercontig_12.5	6139501	6152001
Supercontig_12.5	6178501	6191001
Supercontig_12.5	6388501	6392501
Supercontig_12.5	6435001	6436001
Supercontig_12.6	1	1501
Supercontig_12.6	95501	99501
Supercontig_12.6	105001	120501
Supercontig_12.6	269001	275501
Supercontig_12.6	362001	390501
Supercontig_12.6	433001	444001
Supercontig_12.6	499001	509501
Supercontig_12.6	556001	560501
Supercontig_12.6	762001	764501
Supercontig_12.6	993001	994001
Supercontig_12.6	1069501	1088501
Supercontig_12.6	1138501	1141001
Supercontig_12.6	1171501	1193501
Supercontig_12.6	1250001	1252001
Supercontig_12.6	1329001	1339501
Supercontig_12.6	1569501	1571501
Supercontig_12.6	1756001	1760501
Supercontig_12.6	1766001	1777001
Supercontig_12.6	1794501	1824501
Supercontig_12.6	1843001	1881001
Supercontig_12.6	1905001	1909001
Supercontig_12.6	1935001	1959001
Supercontig_12.6	1982501	1991001
Supercontig_12.6	2019501	2021001
Supercontig_12.6	2031001	2034001
Supercontig_12.6	2070501	2073501
Supercontig_12.6	2361501	2362501
Supercontig_12.6	2384001	2387501
Supercontig_12.6	2419501	2424001
Supercontig_12.6	2563001	2564501
Supercontig_12.6	2572001	2574001
Supercontig_12.6	2724501	2750001
Supercontig_12.6	2783501	3080501
Supercontig_12.6	3237001	3241001
Supercontig_12.6	3334501	3339501
Supercontig_12.6	3407001	3420501
Supercontig_12.6	3489001	3493001
Supercontig_12.6	3507501	3538001
Supercontig_12.6	3630501	3646001
Supercontig_12.6	3782001	3794001
Supercontig_12.6	4011001	4020001
Supercontig_12.6	4066501	4071001
Supercontig_12.6	4162501	4218001
Supercontig_12.7	1	1501
Supercontig_12.7	49001	53001
Supercontig_12.7	78501	83501
Supercontig_12.7	135501	153001
Supercontig_12.7	185501	193001
Supercontig_12.7	259501	264501
Supercontig_12.7	274001	293001
Supercontig_12.7	326501	352501
Supercontig_12.7	398501	400501
Supercontig_12.7	502501	526001
Supercontig_12.7	575501	576001
Supercontig_12.7	608501	628001
Supercontig_12.7	735501	738501
Supercontig_12.7	810501	818001
Supercontig_12.7	891001	909001
Supercontig_12.7	1007501	1028001
Supercontig_12.7	1039001	1079501
Supercontig_12.7	1117501	1149501
Supercontig_12.7	1161501	1166501
Supercontig_12.7	1268001	1281001
Supercontig_12.7	1318501	1344001
Supercontig_12.7	1432501	1445001
Supercontig_12.7	1628501	1630001
Supercontig_12.7	1767001	1770001
Supercontig_12.7	1823001	1835501
Supercontig_12.7	1877501	1882001
Supercontig_12.7	2066001	2069501
Supercontig_12.7	2074501	2105501
Supercontig_12.7	2120001	2125001
Supercontig_12.7	2134501	2490501
Supercontig_12.7	2494501	2506501
Supercontig_12.7	2523501	2536501
Supercontig_12.7	2547001	2548501
Supercontig_12.7	2568501	2570001
Supercontig_12.7	2575501	2581001
Supercontig_12.7	2584501	2588501
Supercontig_12.7	2708001	2709501
Supercontig_12.7	2724001	2725001
Supercontig_12.7	2796501	2811001
Supercontig_12.7	2833501	2835501
Supercontig_12.7	2875501	2879501
Supercontig_12.7	2920501	2932001
Supercontig_12.7	3180501	3182001
Supercontig_12.7	3252001	3254001
Supercontig_12.7	3329001	3330001
Supercontig_12.7	3368001	3375501
Supercontig_12.7	3406001	3440501
Supercontig_12.7	3445501	3449501
Supercontig_12.7	3519001	3520501
Supercontig_12.7	3678001	3704001
Supercontig_12.7	4203501	4216501
Supercontig_12.7	4235501	4255001
Supercontig_12.8	1	192001
Supercontig_12.9	1	142001

## Sheet: SICER-H3K27me2me3-WT-peaks
Supercontig_12.1	1	22501
Supercontig_12.1	33001	51501
Supercontig_12.1	57501	64001
Supercontig_12.1	89001	99001
Supercontig_12.1	134001	136001
Supercontig_12.1	179001	199501
Supercontig_12.1	208001	225001
Supercontig_12.1	242501	267501
Supercontig_12.1	288001	305501
Supercontig_12.1	313501	320501
Supercontig_12.1	329501	334001
Supercontig_12.1	369501	377501
Supercontig_12.1	442001	445001
Supercontig_12.1	480001	488001
Supercontig_12.1	6375501	6377501
Supercontig_12.1	6454001	6456501
Supercontig_12.1	8718501	8723001
Supercontig_12.1	8866501	8873001
Supercontig_12.1	8889001	8892001
Supercontig_12.1	9649001	9653001
Supercontig_12.1	9666001	9675501
Supercontig_12.1	9680001	9702501
Supercontig_12.1	9757501	9798501
Supercontig_12.18	1501	3001
Supercontig_12.2	1	23001
Supercontig_12.2	26001	42501
Supercontig_12.2	49501	58001
Supercontig_12.2	69001	79001
Supercontig_12.2	105001	109001
Supercontig_12.2	147001	151001
Supercontig_12.2	418001	421001
Supercontig_12.2	486501	488001
Supercontig_12.2	559001	573001
Supercontig_12.2	581001	588001
Supercontig_12.2	867001	870501
Supercontig_12.2	1463001	1467501
Supercontig_12.2	1676001	1688501
Supercontig_12.2	1693001	1694501
Supercontig_12.2	1703001	1709501
Supercontig_12.2	1733501	1739001
Supercontig_12.2	3791001	3792501
Supercontig_12.2	4044001	4048001
Supercontig_12.2	4092501	4094501
Supercontig_12.2	4158501	4168001
Supercontig_12.2	4428501	4430001
Supercontig_12.2	4435001	4438001
Supercontig_12.2	4445001	4455001
Supercontig_12.2	4460501	4478501
Supercontig_12.20	1	1501
Supercontig_12.3	1	17001
Supercontig_12.3	21501	35501
Supercontig_12.3	74501	75001
Supercontig_12.3	87001	91501
Supercontig_12.3	156001	169001
Supercontig_12.3	196501	202001
Supercontig_12.3	216001	255001
Supercontig_12.3	261001	302001
Supercontig_12.3	327001	330501
Supercontig_12.3	341001	347501
Supercontig_12.3	380501	401501
Supercontig_12.3	413001	417501
Supercontig_12.3	423501	431001
Supercontig_12.3	447001	464001
Supercontig_12.3	554001	560501
Supercontig_12.3	571001	576501
Supercontig_12.3	1337001	1340501
Supercontig_12.3	4515001	4518001
Supercontig_12.3	4533001	4537501
Supercontig_12.3	4560001	4562001
Supercontig_12.3	4571501	4579501
Supercontig_12.3	4596501	4600001
Supercontig_12.3	4624001	4663001
Supercontig_12.3	4673001	4694501
Supercontig_12.3	4721501	4830001
Supercontig_12.3	4856501	4880501
Supercontig_12.3	4909001	4911501
Supercontig_12.3	4926001	4932501
Supercontig_12.3	4960501	5001001
Supercontig_12.3	5013001	5034001
Supercontig_12.3	5052001	5064001
Supercontig_12.3	5080001	5080501
Supercontig_12.3	5088501	5099001
Supercontig_12.3	5114501	5120001
Supercontig_12.3	5128001	5132501
Supercontig_12.3	5143001	5147501
Supercontig_12.3	5180501	5185001
Supercontig_12.3	5203501	5208001
Supercontig_12.3	5219001	5221501
Supercontig_12.3	5224501	5233501
Supercontig_12.3	5242501	5274501
Supercontig_12.4	1	34001
Supercontig_12.4	54001	57501
Supercontig_12.4	66501	75001
Supercontig_12.4	99001	114501
Supercontig_12.4	140501	144501
Supercontig_12.4	173001	211501
Supercontig_12.4	222501	228001
Supercontig_12.4	245501	257001
Supercontig_12.4	274501	287001
Supercontig_12.4	293001	297001
Supercontig_12.4	304001	364501
Supercontig_12.4	372001	399501
Supercontig_12.4	405001	415501
Supercontig_12.4	437001	439501
Supercontig_12.4	462501	478001
Supercontig_12.4	491501	497501
Supercontig_12.4	502501	519001
Supercontig_12.4	535501	538001
Supercontig_12.4	543001	570501
Supercontig_12.4	575001	599001
Supercontig_12.4	604501	622501
Supercontig_12.4	629001	665001
Supercontig_12.4	672501	676501
Supercontig_12.4	694501	700501
Supercontig_12.4	705001	748001
Supercontig_12.4	756501	766001
Supercontig_12.4	771501	775001
Supercontig_12.4	789001	792001
Supercontig_12.4	798001	801001
Supercontig_12.4	832001	840501
Supercontig_12.4	857501	860001
Supercontig_12.4	3025001	3028501
Supercontig_12.4	5013001	5017501
Supercontig_12.4	5038501	5045501
Supercontig_12.4	5069501	5100501
Supercontig_12.4	5141001	5158001
Supercontig_12.4	5201001	5209501
Supercontig_12.4	5248501	5254501
Supercontig_12.4	5807501	5812501
Supercontig_12.4	5829501	5835001
Supercontig_12.4	5846501	5855501
Supercontig_12.4	5864001	5872501
Supercontig_12.4	5878001	5891501
Supercontig_12.4	5903001	5904001
Supercontig_12.4	5912001	5915001
Supercontig_12.4	5928001	5931001
Supercontig_12.4	5937001	5953501
Supercontig_12.4	5985501	6000501
Supercontig_12.5	6501	7501
Supercontig_12.5	21501	25001
Supercontig_12.5	78501	87501
Supercontig_12.5	252501	255001
Supercontig_12.5	528001	531001
Supercontig_12.5	554001	580001
Supercontig_12.5	617501	622501
Supercontig_12.5	636501	665501
Supercontig_12.5	674501	677001
Supercontig_12.5	680001	689001
Supercontig_12.5	771001	781501
Supercontig_12.5	796001	800001
Supercontig_12.5	5942501	5947501
Supercontig_12.5	5954501	5958001
Supercontig_12.5	5968001	5979501
Supercontig_12.5	6022001	6068001
Supercontig_12.5	6081001	6090501
Supercontig_12.5	6095501	6103501
Supercontig_12.5	6114001	6126001
Supercontig_12.5	6150501	6179001
Supercontig_12.5	6190501	6204501
Supercontig_12.5	6211001	6243501
Supercontig_12.5	6263001	6266001
Supercontig_12.5	6377001	6389501
Supercontig_12.5	6410001	6436001
Supercontig_12.6	1	11501
Supercontig_12.6	15501	30501
Supercontig_12.6	35501	42001
Supercontig_12.6	47001	51501
Supercontig_12.6	54501	57001
Supercontig_12.6	64001	68001
Supercontig_12.6	82001	93501
Supercontig_12.6	121001	136001
Supercontig_12.6	141001	167501
Supercontig_12.6	179001	219001
Supercontig_12.6	233001	243501
Supercontig_12.6	341001	362001
Supercontig_12.6	390501	398001
Supercontig_12.6	408501	424001
Supercontig_12.6	427501	433001
Supercontig_12.6	443001	484001
Supercontig_12.6	488001	489501
Supercontig_12.6	3458001	3460501
Supercontig_12.6	3467501	3477501
Supercontig_12.6	3487501	3507501
Supercontig_12.6	3538501	3550001
Supercontig_12.6	3553501	3556001
Supercontig_12.6	3640501	3641001
Supercontig_12.6	3646001	3651001
Supercontig_12.6	3670001	3676001
Supercontig_12.6	3698501	3782501
Supercontig_12.6	3794001	3819501
Supercontig_12.6	3825001	3847001
Supercontig_12.6	3868001	3872501
Supercontig_12.6	3876001	3879501
Supercontig_12.6	3886501	3902001
Supercontig_12.6	3918001	3929501
Supercontig_12.6	4053001	4058501
Supercontig_12.6	4132501	4135001
Supercontig_12.6	4142501	4177501
Supercontig_12.6	4208001	4218001
Supercontig_12.7	1	14001
Supercontig_12.7	18001	21001
Supercontig_12.7	51001	52501
Supercontig_12.7	96501	115501
Supercontig_12.7	155001	159001
Supercontig_12.7	238501	259501
Supercontig_12.7	304501	321001
Supercontig_12.7	370501	373001
Supercontig_12.7	387001	391501
Supercontig_12.7	437501	441001
Supercontig_12.7	660501	677501
Supercontig_12.7	692501	722001
Supercontig_12.7	884001	891001
Supercontig_12.7	909001	934001
Supercontig_12.7	940501	949001
Supercontig_12.7	1344501	1356501
Supercontig_12.7	1585501	1614501
Supercontig_12.7	3374501	3377001
Supercontig_12.7	3650001	3665501
Supercontig_12.7	3671501	3678001
Supercontig_12.7	3760501	3764501
Supercontig_12.7	4106501	4113001
Supercontig_12.7	4165501	4173501
Supercontig_12.7	4196001	4204001
Supercontig_12.7	4215001	4224001
Supercontig_12.7	4230501	4255001
Supercontig_12.8	47001	48501
Supercontig_12.8	72501	75001
Supercontig_12.8	83001	101501
Supercontig_12.8	108501	109501
Supercontig_12.9	1	23001
Supercontig_12.9	39501	45001
Supercontig_12.9	84001	84501

## Sheet: SICER-H3K27me2me3-dim1-peaks
Supercontig_12.1	1	112001
Supercontig_12.1	116001	138501
Supercontig_12.1	166501	175001
Supercontig_12.1	178501	231501
Supercontig_12.1	239001	306501
Supercontig_12.1	312001	324501
Supercontig_12.1	361001	363501
Supercontig_12.1	370001	377501
Supercontig_12.1	441501	445001
Supercontig_12.1	479001	488001
Supercontig_12.1	667501	670501
Supercontig_12.1	693001	698501
Supercontig_12.1	1316501	1323501
Supercontig_12.1	1349501	1352501
Supercontig_12.1	1997001	2003001
Supercontig_12.1	2023001	2026501
Supercontig_12.1	2270501	2283001
Supercontig_12.1	5922001	5923001
Supercontig_12.1	6240501	6250001
Supercontig_12.1	6261501	6281001
Supercontig_12.1	6454001	6460001
Supercontig_12.1	8172501	8176001
Supercontig_12.1	8187501	8192001
Supercontig_12.1	8207001	8209001
Supercontig_12.1	8221001	8225001
Supercontig_12.1	8367501	8370501
Supercontig_12.1	8715501	8722001
Supercontig_12.1	8827001	8829501
Supercontig_12.1	8864501	8868001
Supercontig_12.1	9266001	9268001
Supercontig_12.1	9491501	9493501
Supercontig_12.1	9520501	9523001
Supercontig_12.1	9649001	9654001
Supercontig_12.1	9662501	9798501
Supercontig_12.12	6001	7001
Supercontig_12.15	8001	9001
Supercontig_12.16	4001	6001
Supercontig_12.18	1	6001
Supercontig_12.2	1	59001
Supercontig_12.2	68001	80501
Supercontig_12.2	91501	154001
Supercontig_12.2	365001	367501
Supercontig_12.2	378501	380001
Supercontig_12.2	385501	388001
Supercontig_12.2	417501	420501
Supercontig_12.2	485501	488001
Supercontig_12.2	584001	587501
Supercontig_12.2	777501	797001
Supercontig_12.2	813501	819501
Supercontig_12.2	1464001	1466501
Supercontig_12.2	1490001	1492501
Supercontig_12.2	1676001	1679001
Supercontig_12.2	1750501	1754001
Supercontig_12.2	3303501	3315501
Supercontig_12.2	3565001	3567001
Supercontig_12.2	3688001	3700501
Supercontig_12.2	3764501	3766501
Supercontig_12.2	3779501	3781501
Supercontig_12.2	3790001	3793501
Supercontig_12.2	3840001	3842001
Supercontig_12.2	3869501	3871501
Supercontig_12.2	3887001	3890001
Supercontig_12.2	3927001	3929501
Supercontig_12.2	4038001	4053501
Supercontig_12.2	4064501	4067501
Supercontig_12.2	4083501	4086001
Supercontig_12.2	4091001	4100001
Supercontig_12.2	4120001	4123001
Supercontig_12.2	4132501	4135501
Supercontig_12.2	4145001	4147501
Supercontig_12.2	4151501	4181501
Supercontig_12.2	4195501	4197501
Supercontig_12.2	4202501	4205001
Supercontig_12.2	4224001	4244001
Supercontig_12.2	4258001	4285001
Supercontig_12.2	4288001	4337001
Supercontig_12.2	4346001	4352501
Supercontig_12.2	4367001	4369001
Supercontig_12.2	4409001	4411001
Supercontig_12.2	4416501	4418501
Supercontig_12.2	4426001	4478501
Supercontig_12.20	1	1501
Supercontig_12.3	1	112001
Supercontig_12.3	118001	128001
Supercontig_12.3	134001	141001
Supercontig_12.3	146501	305501
Supercontig_12.3	320001	350001
Supercontig_12.3	376501	408001
Supercontig_12.3	412501	433001
Supercontig_12.3	440001	464001
Supercontig_12.3	467501	477001
Supercontig_12.3	485001	494501
Supercontig_12.3	501501	505001
Supercontig_12.3	510001	513001
Supercontig_12.3	525501	534001
Supercontig_12.3	548001	586501
Supercontig_12.3	592001	605501
Supercontig_12.3	683001	693501
Supercontig_12.3	1727501	1733501
Supercontig_12.3	4387001	4390001
Supercontig_12.3	4465501	4476501
Supercontig_12.3	4494001	4497501
Supercontig_12.3	4513501	4519501
Supercontig_12.3	4522501	4544001
Supercontig_12.3	4558001	4612001
Supercontig_12.3	4616501	4883501
Supercontig_12.3	4887501	4888501
Supercontig_12.3	4906501	4913501
Supercontig_12.3	4917501	4947001
Supercontig_12.3	4960001	5150001
Supercontig_12.3	5154001	5274501
Supercontig_12.4	1	88501
Supercontig_12.4	94001	157501
Supercontig_12.4	163501	229001
Supercontig_12.4	235501	417501
Supercontig_12.4	436001	478001
Supercontig_12.4	481501	497501
Supercontig_12.4	502501	665001
Supercontig_12.4	671501	778501
Supercontig_12.4	785001	802001
Supercontig_12.4	810001	813501
Supercontig_12.4	830501	834001
Supercontig_12.4	841501	845001
Supercontig_12.4	856501	862001
Supercontig_12.4	870001	875501
Supercontig_12.4	4323001	4329001
Supercontig_12.4	5038501	5045501
Supercontig_12.4	5148001	5156001
Supercontig_12.4	5167001	5169501
Supercontig_12.4	5192501	5196001
Supercontig_12.4	5204501	5210501
Supercontig_12.4	5246501	5253501
Supercontig_12.4	5269001	5272001
Supercontig_12.4	5302501	5306001
Supercontig_12.4	5331501	5335001
Supercontig_12.4	5757001	5761501
Supercontig_12.4	5800001	5838501
Supercontig_12.4	5842001	6000501
Supercontig_12.5	6001	7501
Supercontig_12.5	17501	26001
Supercontig_12.5	76501	82501
Supercontig_12.5	562501	578001
Supercontig_12.5	637001	665501
Supercontig_12.5	674501	685501
Supercontig_12.5	771001	783501
Supercontig_12.5	1705501	1708001
Supercontig_12.5	5496501	5500501
Supercontig_12.5	5942501	5982001
Supercontig_12.5	6005001	6132501
Supercontig_12.5	6137501	6270001
Supercontig_12.5	6275001	6278501
Supercontig_12.5	6292501	6294001
Supercontig_12.5	6319501	6329501
Supercontig_12.5	6339001	6350501
Supercontig_12.5	6360501	6371001
Supercontig_12.5	6375001	6436001
Supercontig_12.6	1	257501
Supercontig_12.6	269001	294001
Supercontig_12.6	298501	309501
Supercontig_12.6	319501	325501
Supercontig_12.6	339001	398501
Supercontig_12.6	403501	511501
Supercontig_12.6	516501	582001
Supercontig_12.6	588001	591501
Supercontig_12.6	595501	609001
Supercontig_12.6	624501	626501
Supercontig_12.6	1187001	1189501
Supercontig_12.6	1494501	1497001
Supercontig_12.6	1726001	1730001
Supercontig_12.6	1930501	1936001
Supercontig_12.6	1948001	1965001
Supercontig_12.6	2012001	2016501
Supercontig_12.6	2586001	2587501
Supercontig_12.6	3229001	3236001
Supercontig_12.6	3296001	3304001
Supercontig_12.6	3320001	3344501
Supercontig_12.6	3350501	3358501
Supercontig_12.6	3390001	3394001
Supercontig_12.6	3416001	3438001
Supercontig_12.6	3449001	3509501
Supercontig_12.6	3518001	3600501
Supercontig_12.6	3610001	3617501
Supercontig_12.6	3629001	3653001
Supercontig_12.6	3656001	3685501
Supercontig_12.6	3696501	3864001
Supercontig_12.6	3867501	3937001
Supercontig_12.6	3943001	3948501
Supercontig_12.6	3964501	3968001
Supercontig_12.6	3972001	3995501
Supercontig_12.6	4005001	4085001
Supercontig_12.6	4107001	4136001
Supercontig_12.6	4140501	4218001
Supercontig_12.7	1	32501
Supercontig_12.7	36001	56501
Supercontig_12.7	66501	86001
Supercontig_12.7	89001	130501
Supercontig_12.7	135001	159501
Supercontig_12.7	186001	193001
Supercontig_12.7	198001	207501
Supercontig_12.7	213001	228501
Supercontig_12.7	238001	277501
Supercontig_12.7	298001	328501
Supercontig_12.7	347001	365501
Supercontig_12.7	369501	394501
Supercontig_12.7	398501	443001
Supercontig_12.7	450501	480001
Supercontig_12.7	488001	495501
Supercontig_12.7	538501	542001
Supercontig_12.7	550001	556001
Supercontig_12.7	563501	571501
Supercontig_12.7	583001	586501
Supercontig_12.7	662501	672001
Supercontig_12.7	696001	715501
Supercontig_12.7	884001	893501
Supercontig_12.7	908001	949001
Supercontig_12.7	957001	960501
Supercontig_12.7	1029501	1032501
Supercontig_12.7	1091501	1098001
Supercontig_12.7	1151501	1163501
Supercontig_12.7	1177001	1204001
Supercontig_12.7	1212501	1231001
Supercontig_12.7	1237001	1249501
Supercontig_12.7	1257001	1264501
Supercontig_12.7	1309001	1319501
Supercontig_12.7	1342501	1359501
Supercontig_12.7	1571501	1577001
Supercontig_12.7	1585501	1614001
Supercontig_12.7	1621001	1626001
Supercontig_12.7	1702501	1705501
Supercontig_12.7	3380001	3382501
Supercontig_12.7	3387501	3389001
Supercontig_12.7	3636001	3639501
Supercontig_12.7	3650501	3654001
Supercontig_12.7	3662001	3665501
Supercontig_12.7	3671001	3675501
Supercontig_12.7	3762501	3765001
Supercontig_12.7	3947501	3951501
Supercontig_12.7	3955001	3956501
Supercontig_12.7	3972001	3975501
Supercontig_12.7	4010001	4047001
Supercontig_12.7	4058001	4061501
Supercontig_12.7	4074501	4077001
Supercontig_12.7	4080001	4121001
Supercontig_12.7	4125001	4127501
Supercontig_12.7	4137001	4140501
Supercontig_12.7	4146501	4152001
Supercontig_12.7	4158001	4175001
Supercontig_12.7	4184001	4255001
Supercontig_12.8	1	101501
Supercontig_12.8	108501	109501
Supercontig_12.8	117001	119001
Supercontig_12.8	135501	137001
Supercontig_12.8	144001	145501
Supercontig_12.8	177001	179001
Supercontig_12.8	185501	189001
Supercontig_12.9	1	142001

## Sheet: H3K9me3_peak_dim1-minus-WT_MACS
Supercontig_12.1	529209	529210
Supercontig_12.1	603693	606733
Supercontig_12.1	650033	651662
Supercontig_12.1	664041	664042
Supercontig_12.1	739883	739884
Supercontig_12.1	782201	782202
Supercontig_12.1	784434	784435
Supercontig_12.1	802815	802816
Supercontig_12.1	1309852	1311430
Supercontig_12.1	1391809	1391810
Supercontig_12.1	1567922	1567923
Supercontig_12.1	1579963	1579964
Supercontig_12.1	1584159	1584592
Supercontig_12.1	1709160	1710989
Supercontig_12.1	1759636	1759637
Supercontig_12.1	1823355	1823356
Supercontig_12.1	1843028	1843029
Supercontig_12.1	1925036	1925037
Supercontig_12.1	2001897	2001898
Supercontig_12.1	2007668	2008043
Supercontig_12.1	2020417	2020418
Supercontig_12.1	2074308	2074309
Supercontig_12.1	2216803	2216804
Supercontig_12.1	2246132	2247482
Supercontig_12.1	2368025	2368026
Supercontig_12.1	2552760	2553526
Supercontig_12.1	2601205	2601492
Supercontig_12.1	2894998	2894999
Supercontig_12.1	2947877	2947878
Supercontig_12.1	2966229	2966230
Supercontig_12.1	2978959	2978960
Supercontig_12.1	2989768	2989769
Supercontig_12.1	3017188	3018898
Supercontig_12.1	3033037	3033038
Supercontig_12.1	3130233	3132485
Supercontig_12.1	3159029	3159030
Supercontig_12.1	3227106	3227107
Supercontig_12.1	3290455	3290456
Supercontig_12.1	3295960	3295961
Supercontig_12.1	3357551	3357552
Supercontig_12.1	3378436	3378437
Supercontig_12.1	3455304	3455305
Supercontig_12.1	3512871	3512872
Supercontig_12.1	3529483	3529484
Supercontig_12.1	3576673	3576674
Supercontig_12.1	3579814	3579815
Supercontig_12.1	3672291	3672886
Supercontig_12.1	4244083	4244084
Supercontig_12.1	4246781	4246782
Supercontig_12.1	4277467	4278092
Supercontig_12.1	4295877	4295878
Supercontig_12.1	4376094	4376095
Supercontig_12.1	4386232	4386233
Supercontig_12.1	4432375	4433566
Supercontig_12.1	4440808	4440809
Supercontig_12.1	4551334	4552490
Supercontig_12.1	4605415	4605416
Supercontig_12.1	4669554	4669555
Supercontig_12.1	4841361	4841362
Supercontig_12.1	4861288	4862775
Supercontig_12.1	4896090	4897583
Supercontig_12.1	4934570	4934571
Supercontig_12.1	5022653	5022654
Supercontig_12.1	5069549	5069550
Supercontig_12.1	5093605	5093606
Supercontig_12.1	5200470	5200471
Supercontig_12.1	5242744	5242745
Supercontig_12.1	5352212	5352213
Supercontig_12.1	5355977	5355978
Supercontig_12.1	5415637	5415638
Supercontig_12.1	5624569	5624570
Supercontig_12.1	5815059	5815060
Supercontig_12.1	5825445	5825446
Supercontig_12.1	6026521	6026522
Supercontig_12.1	6079559	6081024
Supercontig_12.1	6105890	6105891
Supercontig_12.1	6128482	6128483
Supercontig_12.1	6157737	6158228
Supercontig_12.1	6265728	6265729
Supercontig_12.1	6623010	6623630
Supercontig_12.1	6659188	6661661
Supercontig_12.1	6675434	6676455
Supercontig_12.1	6728924	6728925
Supercontig_12.1	6760802	6760803
Supercontig_12.1	6770362	6770363
Supercontig_12.1	6819120	6819389
Supercontig_12.1	6960088	6960089
Supercontig_12.1	6970553	6970554
Supercontig_12.1	7107346	7108370
Supercontig_12.1	7237581	7237582
Supercontig_12.1	7322718	7323247
Supercontig_12.1	7359360	7359821
Supercontig_12.1	7425047	7425048
Supercontig_12.1	7462986	7462987
Supercontig_12.1	7555884	7555885
Supercontig_12.1	7562550	7562551
Supercontig_12.1	7612583	7612584
Supercontig_12.1	7748216	7748217
Supercontig_12.1	7894908	7894909
Supercontig_12.1	7959510	7960799
Supercontig_12.1	8153196	8153197
Supercontig_12.1	8270942	8270943
Supercontig_12.1	8320105	8320106
Supercontig_12.1	8325027	8326398
Supercontig_12.1	8328548	8328549
Supercontig_12.1	8366322	8368817
Supercontig_12.1	8374125	8374126
Supercontig_12.1	8439841	8440905
Supercontig_12.1	8455009	8455010
Supercontig_12.1	8492681	8495323
Supercontig_12.1	8529540	8529541
Supercontig_12.1	8582705	8582706
Supercontig_12.1	8622662	8622663
Supercontig_12.1	8713804	8713805
Supercontig_12.1	8786475	8787342
Supercontig_12.1	8818216	8818811
Supercontig_12.1	8952962	8953669
Supercontig_12.1	9018550	9019756
Supercontig_12.1	9035306	9035307
Supercontig_12.1	9362637	9362638
Supercontig_12.1	9367782	9367783
Supercontig_12.2	373547	373548
Supercontig_12.2	378904	378905
Supercontig_12.2	454092	454093
Supercontig_12.2	486243	486244
Supercontig_12.2	604169	604170
Supercontig_12.2	626197	626198
Supercontig_12.2	784599	784600
Supercontig_12.2	1380787	1380788
Supercontig_12.2	1433272	1433273
Supercontig_12.2	1521654	1522147
Supercontig_12.2	1607765	1607766
Supercontig_12.2	1630419	1630420
Supercontig_12.2	1639030	1639031
Supercontig_12.2	1749607	1749608
Supercontig_12.2	1752669	1753868
Supercontig_12.2	1797227	1797843
Supercontig_12.2	1822084	1822085
Supercontig_12.2	2180411	2180412
Supercontig_12.2	2222368	2222369
Supercontig_12.2	2239884	2239885
Supercontig_12.2	2280425	2280426
Supercontig_12.2	2389733	2389734
Supercontig_12.2	2415275	2415276
Supercontig_12.2	2418881	2419380
Supercontig_12.2	2576739	2579392
Supercontig_12.2	2592144	2592145
Supercontig_12.2	2716744	2716745
Supercontig_12.2	2722751	2722752
Supercontig_12.2	2883252	2883253
Supercontig_12.2	3089145	3089715
Supercontig_12.2	3094610	3094611
Supercontig_12.2	3159403	3159404
Supercontig_12.2	3198285	3199683
Supercontig_12.2	3271401	3272027
Supercontig_12.2	3274482	3274483
Supercontig_12.2	3276716	3276717
Supercontig_12.2	3341907	3341908
Supercontig_12.2	3453443	3453444
Supercontig_12.2	3481235	3481236
Supercontig_12.2	3540936	3540937
Supercontig_12.2	3566647	3566648
Supercontig_12.2	3864205	3865637
Supercontig_12.2	3981832	3981833
Supercontig_12.2	4010794	4010795
Supercontig_12.2	4445339	4445340
Supercontig_12.3	47642	47643
Supercontig_12.3	150791	150792
Supercontig_12.3	209167	209168
Supercontig_12.3	504835	504836
Supercontig_12.3	607590	607591
Supercontig_12.3	645353	645354
Supercontig_12.3	993905	993906
Supercontig_12.3	1023641	1023642
Supercontig_12.3	1084547	1084548
Supercontig_12.3	1113793	1113794
Supercontig_12.3	1165444	1165445
Supercontig_12.3	1192673	1192674
Supercontig_12.3	1242652	1242653
Supercontig_12.3	1497058	1497059
Supercontig_12.3	1562800	1562801
Supercontig_12.3	1572028	1572476
Supercontig_12.3	1598023	1598024
Supercontig_12.3	1619600	1622009
Supercontig_12.3	1801262	1801263
Supercontig_12.3	1893170	1893171
Supercontig_12.3	1897834	1900582
Supercontig_12.3	1975924	1975925
Supercontig_12.3	1979436	1979437
Supercontig_12.3	2024544	2024545
Supercontig_12.3	2256198	2256199
Supercontig_12.3	2275572	2275573
Supercontig_12.3	2303960	2303961
Supercontig_12.3	2416274	2416275
Supercontig_12.3	2472579	2472580
Supercontig_12.3	2480050	2480051
Supercontig_12.3	2501572	2501573
Supercontig_12.3	2520869	2522984
Supercontig_12.3	2569994	2569995
Supercontig_12.3	2581932	2581933
Supercontig_12.3	2698357	2700046
Supercontig_12.3	2726596	2726597
Supercontig_12.3	2745046	2745375
Supercontig_12.3	2748240	2748241
Supercontig_12.3	2768447	2768448
Supercontig_12.3	3223525	3223526
Supercontig_12.3	3513734	3513735
Supercontig_12.3	3661531	3661532
Supercontig_12.3	3860916	3860917
Supercontig_12.3	3928381	3929890
Supercontig_12.3	3985180	3985181
Supercontig_12.3	4152487	4152488
Supercontig_12.3	4249201	4249202
Supercontig_12.3	4334946	4334947
Supercontig_12.3	4443252	4443253
Supercontig_12.3	4687713	4687714
Supercontig_12.3	5001567	5001923
Supercontig_12.3	5157539	5158095
Supercontig_12.3	5169371	5170816
Supercontig_12.3	5272382	5272383
Supercontig_12.4	431751	431752
Supercontig_12.4	756476	756477
Supercontig_12.4	830541	831065
Supercontig_12.4	1234127	1234128
Supercontig_12.4	1280274	1280275
Supercontig_12.4	1308491	1309049
Supercontig_12.4	1550090	1550091
Supercontig_12.4	1811416	1811936
Supercontig_12.4	1864156	1864157
Supercontig_12.4	1997620	1997621
Supercontig_12.4	2130841	2131390
Supercontig_12.4	2177935	2177936
Supercontig_12.4	2246298	2246299
Supercontig_12.4	2249849	2249850
Supercontig_12.4	2314465	2314466
Supercontig_12.4	2468712	2468713
Supercontig_12.4	2496185	2496186
Supercontig_12.4	2517310	2517780
Supercontig_12.4	2629550	2629551
Supercontig_12.4	2903609	2903610
Supercontig_12.4	2912133	2912134
Supercontig_12.4	3418533	3418534
Supercontig_12.4	3542342	3542343
Supercontig_12.4	3679798	3681693
Supercontig_12.4	3723119	3723120
Supercontig_12.4	3734384	3734385
Supercontig_12.4	3850303	3850304
Supercontig_12.4	3883704	3883705
Supercontig_12.4	3996510	3996511
Supercontig_12.4	4323735	4323736
Supercontig_12.4	4430762	4430763
Supercontig_12.4	4499927	4499928
Supercontig_12.4	4757519	4757520
Supercontig_12.4	4856665	4856666
Supercontig_12.4	4898413	4898887
Supercontig_12.4	5169408	5169409
Supercontig_12.4	5186255	5186256
Supercontig_12.4	5391784	5391785
Supercontig_12.4	5436358	5436359
Supercontig_12.4	5464888	5464889
Supercontig_12.4	5467999	5470767
Supercontig_12.4	5475660	5475661
Supercontig_12.4	5494512	5494513
Supercontig_12.4	5659624	5660621
Supercontig_12.4	5677542	5678010
Supercontig_12.4	5757372	5759169
Supercontig_12.5	296125	296126
Supercontig_12.5	308864	310836
Supercontig_12.5	338619	338620
Supercontig_12.5	627460	628486
Supercontig_12.5	711079	711080
Supercontig_12.5	827479	827480
Supercontig_12.5	1275946	1275947
Supercontig_12.5	1640127	1640431
Supercontig_12.5	1658570	1658571
Supercontig_12.5	1850192	1850193
Supercontig_12.5	1911368	1911369
Supercontig_12.5	2078518	2079608
Supercontig_12.5	2128300	2129157
Supercontig_12.5	2152145	2152146
Supercontig_12.5	2160237	2160238
Supercontig_12.5	2183211	2183866
Supercontig_12.5	2209808	2209809
Supercontig_12.5	2270357	2270358
Supercontig_12.5	2274482	2274483
Supercontig_12.5	2326829	2326830
Supercontig_12.5	2358778	2358779
Supercontig_12.5	2427138	2427139
Supercontig_12.5	2540993	2540994
Supercontig_12.5	3244365	3244864
Supercontig_12.5	3250638	3250639
Supercontig_12.5	3270481	3270482
Supercontig_12.5	3277410	3277411
Supercontig_12.5	3344064	3345726
Supercontig_12.5	3425415	3425416
Supercontig_12.5	3619118	3619119
Supercontig_12.5	3723116	3723117
Supercontig_12.5	3855746	3855747
Supercontig_12.5	3966503	3966504
Supercontig_12.5	3981303	3981304
Supercontig_12.5	3987099	3988741
Supercontig_12.5	3994792	3994793
Supercontig_12.5	4071479	4071480
Supercontig_12.5	4274805	4274806
Supercontig_12.5	4289117	4289933
Supercontig_12.5	4305004	4305005
Supercontig_12.5	4331823	4331824
Supercontig_12.5	4398801	4400098
Supercontig_12.5	4410256	4410257
Supercontig_12.5	4428453	4428454
Supercontig_12.5	4489344	4489978
Supercontig_12.5	4700850	4704113
Supercontig_12.5	4973385	4973386
Supercontig_12.5	5044492	5044493
Supercontig_12.5	5127936	5127937
Supercontig_12.5	5130497	5130498
Supercontig_12.5	5241854	5241855
Supercontig_12.5	5349512	5350605
Supercontig_12.5	5807023	5807024
Supercontig_12.5	6130231	6130593
Supercontig_12.5	6206472	6206473
Supercontig_12.5	6292916	6292917
Supercontig_12.6	309125	310973
Supercontig_12.6	318413	322159
Supercontig_12.6	508558	508559
Supercontig_12.6	532591	532592
Supercontig_12.6	539791	539792
Supercontig_12.6	588232	588233
Supercontig_12.6	698729	698730
Supercontig_12.6	753632	754794
Supercontig_12.6	763447	763448
Supercontig_12.6	993452	993453
Supercontig_12.6	1042570	1042571
Supercontig_12.6	1140077	1140078
Supercontig_12.6	1250388	1251073
Supercontig_12.6	1482924	1482925
Supercontig_12.6	1570103	1570104
Supercontig_12.6	2036456	2037769
Supercontig_12.6	2062305	2063046
Supercontig_12.6	2071465	2071466
Supercontig_12.6	2165451	2166414
Supercontig_12.6	2239299	2239300
Supercontig_12.6	2273368	2273369
Supercontig_12.6	2316323	2316324
Supercontig_12.6	2360380	2360381
Supercontig_12.6	2390535	2390536
Supercontig_12.6	2414889	2414890
Supercontig_12.6	2432181	2434127
Supercontig_12.6	2563147	2563148
Supercontig_12.6	2614834	2614835
Supercontig_12.6	2637024	2637025
Supercontig_12.6	2670905	2670906
Supercontig_12.6	2739817	2739818
Supercontig_12.6	2750396	2750397
Supercontig_12.6	2755063	2756857
Supercontig_12.6	3157078	3157079
Supercontig_12.6	3260658	3261037
Supercontig_12.6	3883820	3883821
Supercontig_12.6	4023397	4023861
Supercontig_12.7	399126	400253
Supercontig_12.7	567047	567791
Supercontig_12.7	575969	575970
Supercontig_12.7	626527	627650
Supercontig_12.7	736139	737646
Supercontig_12.7	839437	839438
Supercontig_12.7	857497	857498
Supercontig_12.7	1408609	1409289
Supercontig_12.7	1526827	1526828
Supercontig_12.7	1724818	1724819
Supercontig_12.7	1945102	1945103
Supercontig_12.7	1947801	1947802
Supercontig_12.7	1967632	1967633
Supercontig_12.7	1995221	1995222
Supercontig_12.7	2112369	2112370
Supercontig_12.7	2486174	2486175
Supercontig_12.7	2547594	2547994
Supercontig_12.7	2552558	2552559
Supercontig_12.7	2569354	2569355
Supercontig_12.7	2585888	2587898
Supercontig_12.7	2638811	2638812
Supercontig_12.7	2708785	2708786
Supercontig_12.7	2724414	2724415
Supercontig_12.7	2835141	2835142
Supercontig_12.7	2877353	2877354
Supercontig_12.7	2891932	2891933
Supercontig_12.7	3066761	3067950
Supercontig_12.7	3131239	3131240
Supercontig_12.7	3181030	3181031
Supercontig_12.7	3190498	3190499
Supercontig_12.7	3329394	3329395
Supercontig_12.7	3384291	3384292
Supercontig_12.7	3520429	3520430
Supercontig_12.7	3544343	3544344
Supercontig_12.7	4105295	4105296

## Sheet: H3K9m3_peak_dim1-minus-WT_Sicer
Supercontig_12.1	528501	530501
Supercontig_12.1	602501	607001
Supercontig_12.1	663501	664501
Supercontig_12.1	802001	804501
Supercontig_12.1	1112001	1112501
Supercontig_12.1	1579001	1580501
Supercontig_12.1	1708501	1711501
Supercontig_12.1	1842501	1843501
Supercontig_12.1	2978501	2979501
Supercontig_12.1	3015501	3021001
Supercontig_12.1	3157501	3159501
Supercontig_12.1	3357001	3358001
Supercontig_12.1	3377001	3379001
Supercontig_12.1	3454001	3456501
Supercontig_12.1	3529001	3530001
Supercontig_12.1	3585501	3587001
Supercontig_12.1	3671001	3674001
Supercontig_12.1	4276001	4278001
Supercontig_12.1	4385501	4386501
Supercontig_12.1	4432001	4433501
Supercontig_12.1	4550501	4553001
Supercontig_12.1	4861001	4863501
Supercontig_12.1	4932501	4935001
Supercontig_12.1	5021501	5024501
Supercontig_12.1	5355001	5357001
Supercontig_12.1	5814001	5815501
Supercontig_12.1	6078501	6082001
Supercontig_12.1	6760001	6761501
Supercontig_12.1	7561501	7563001
Supercontig_12.1	7959001	7962001
Supercontig_12.1	8365501	8371001
Supercontig_12.1	8373501	8374501
Supercontig_12.1	8454501	8455501
Supercontig_12.1	8529001	8530001
Supercontig_12.1	8622001	8623001
Supercontig_12.1	8893501	8895501
Supercontig_12.1	9034501	9035501
Supercontig_12.2	348001	349501
Supercontig_12.2	373501	374001
Supercontig_12.2	453001	454501
Supercontig_12.2	1629501	1631501
Supercontig_12.2	1749001	1750001
Supercontig_12.2	1796501	1799501
Supercontig_12.2	2239501	2240001
Supercontig_12.2	2454001	2455501
Supercontig_12.2	2591001	2592501
Supercontig_12.2	2715501	2717501
Supercontig_12.2	3159001	3160001
Supercontig_12.2	3198001	3200501
Supercontig_12.2	3863001	3866001
Supercontig_12.2	3981501	3982001
Supercontig_12.2	4009501	4013001
Supercontig_12.3	208501	209501
Supercontig_12.3	607501	608001
Supercontig_12.3	2303001	2305001
Supercontig_12.3	2416001	2416501
Supercontig_12.3	2472001	2473001
Supercontig_12.3	2519001	2525501
Supercontig_12.3	2568501	2572001
Supercontig_12.3	2696501	2700501
Supercontig_12.3	3222501	3224001
Supercontig_12.3	4151001	4153001
Supercontig_12.3	4332001	4335501
Supercontig_12.3	5000501	5003001
Supercontig_12.4	431501	432501
Supercontig_12.4	455501	456501
Supercontig_12.4	755501	757001
Supercontig_12.4	1549501	1550501
Supercontig_12.4	2177001	2178501
Supercontig_12.4	2244501	2252001
Supercontig_12.4	2629001	2630501
Supercontig_12.4	3542001	3543001
Supercontig_12.4	3679001	3682501
Supercontig_12.4	3734001	3735001
Supercontig_12.4	4898001	4899501
Supercontig_12.4	5168001	5170001
Supercontig_12.4	5390501	5393001
Supercontig_12.4	5436001	5437001
Supercontig_12.4	5463001	5471501
Supercontig_12.4	5474501	5476001
Supercontig_12.4	5756001	5760501
Supercontig_12.5	2077501	2081001
Supercontig_12.5	2151501	2154001
Supercontig_12.5	2183001	2184001
Supercontig_12.5	2274001	2275001
Supercontig_12.5	2426501	2428501
Supercontig_12.5	2810501	2812501
Supercontig_12.5	3276501	3278001
Supercontig_12.5	3343501	3348501
Supercontig_12.5	3424001	3425501
Supercontig_12.5	3981001	3990501
Supercontig_12.5	3993001	3996501
Supercontig_12.5	4304001	4305501
Supercontig_12.5	4397501	4400501
Supercontig_12.5	4427001	4430501
Supercontig_12.5	4489001	4490501
Supercontig_12.6	762001	764501
Supercontig_12.6	993001	994001
Supercontig_12.6	1138501	1141001
Supercontig_12.6	1250001	1252001
Supercontig_12.6	1569501	1571501
Supercontig_12.6	2019501	2021001
Supercontig_12.6	2070501	2073501
Supercontig_12.6	2361501	2362501
Supercontig_12.6	2563001	2564501
Supercontig_12.6	2572001	2574001
Supercontig_12.7	49001	53001
Supercontig_12.7	398501	400501
Supercontig_12.7	575501	576001
Supercontig_12.7	735501	738501
Supercontig_12.7	2547001	2548501
Supercontig_12.7	2584501	2588501
Supercontig_12.7	2708001	2709501
Supercontig_12.7	2724001	2725001
Supercontig_12.7	2833501	2835501
Supercontig_12.7	2875501	2879501
Supercontig_12.7	3180501	3182001
Supercontig_12.7	3329001	3330001
Supercontig_12.7	3519001	3520501

[truncated: 13 more sheets: K27m2m3_dim1-minus-WT_SICER, K27m2m3_WT-minus-dim1_SICER, WT_N3752_5mC-peaks_merge_850bp, dim1_N1634_5mC-pks_merge_850bp, dim1_N5496_5mC-pks_merge_850bp, dim1_N1634_5mC-pks-UPgenes, dim1_N1634_5mC-pks-DOWNgenes, WT-vs-dim1-N1634_diff-5mC-peaks, dim1_N1634-vs-WT_diff-5mC-peaks, dim1_N5496-vs-WT_diff-5mC-peaks, genes_near_5mC-peaks_500bp, genes_far_5mC_7500bp-neg-ctl, 1001-unchanged-gene-list]
